# Supplementary material
Source: PubMed Central journal article supplement (PMC3397382)
Supplement: NIHMS389565-supplement-4_si_004.pdf [file NIHMS389565-supplement-4_si_004.pdf]

# *Supplemental Information*

*for*

## Bifunctional Catalyst Promotes Highly Enantioselective Bromolactonizations to Generate Stereogenic C–Br Bonds

Daniel H. Paull, Chao Fang, James R. Donald, Andrew Pansick, and Stephen F. Martin\*

Department of Chemistry and Biochemistry, The University of Texas at Austin, Austin, Texas 78712

*[sfmartin@mail.utexas.edu](mailto:sfmartin@mail.utexas.edu)*

## *Table of Contents*

|                                                                     |         |
|---------------------------------------------------------------------|---------|
| General procedures                                                  | S3      |
| Synthesis and characterization of catalyst <b>5</b>                 | S4–S7   |
| Synthesis and characterization of olefinic acids                    | S7–S10  |
| Representative enantioselective bromolactonization procedure        | S10     |
| Characterization of new bromolactones                               | S10–S16 |
| HPLC traces for all bromolactones                                   | S17–S32 |
| <sup>1</sup> H and <sup>13</sup> C NMR spectra (by compound number) | S33–S86 |
| X-ray crystal structures                                            | S87     |
| References                                                          | S88     |

## General

Solvents were purified before use as follows unless otherwise noted. Dichloromethane ( $\text{CH}_2\text{Cl}_2$ ) and benzene were distilled from calcium hydride immediately prior to use. Tetrahydrofuran and diethyl ether were dried by filtration through two columns of activated, neutral alumina according to the procedure described by Grubbs.<sup>1</sup> Methanol (MeOH), acetonitrile (MeCN), and dimethylformamide (DMF) were dried by filtration through two columns of activated molecular sieves, and toluene was dried by filtration through one column of activated, neutral alumina followed by one column of Q5 reactant. These solvents were determined to have less than 50 ppm  $\text{H}_2\text{O}$  by Karl Fischer coulometric moisture analysis. Chloroform and acetone were distilled from  $\text{CaSO}_4$  and stored over 4 Å molecular sieves. Reagents were reagent grade and used without purification unless otherwise noted. Trifluoromethanesulfonic anhydride ( $\text{Tf}_2\text{O}$ ) was freshly distilled from  $\text{P}_2\text{O}_5$ . Alkyl halides were passed through a plug of silica and distilled. KCN was crushed and heated at 80 °C under vacuum for 3 h prior to use. Zinc powder was activated and stored under argon. Triethylamine ( $\text{Et}_3\text{N}$ ), ethylene diamine, diisopropylethylamine (Hünig's base), and diisopropylamine were refluxed with, distilled from, and stored over KOH. In nickel(0), palladium(0), and copper(I)-catalyzed reactions, all solvents were freed from oxygen by three freeze-pump-thaw cycles prior to use. All reactions were performed in flame-dried glassware under nitrogen or argon; reaction temperatures refer to the temperature of the cooling/heating bath.

Analytical HPLC separations were performed using a Pirkel Covalent (S,S) Whelk-O1 (Regis Technologies, Inc.), or a Chiralcel OD-H (Daicel Chemical Industries, Ltd.) column, as indicated. Infrared (IR) spectra were obtained either neat on sodium chloride or as solutions in the solvent indicated and reported as wavenumbers ( $\text{cm}^{-1}$ ). Proton nuclear magnetic resonance ( $^1\text{H}$  NMR) and carbon nuclear magnetic resonance ( $^{13}\text{C}$  NMR) spectra were obtained at the indicated field as solutions in  $\text{CDCl}_3$  unless otherwise indicated. Chemical shifts are referenced to the deuterated solvent (*e.g.*, for  $\text{CDCl}_3$ ,  $\delta = 7.26$  ppm and 77.0 ppm for  $^1\text{H}$  and  $^{13}\text{C}$  NMR, respectively) and are reported in parts per million (ppm,  $\delta$ ) relative to tetramethylsilane (TMS,  $\delta = 0.00$  ppm). Coupling constants ( $J$ ) are reported in Hz and the splitting abbreviations used are: s, singlet; d, doublet; t, triplet; q, quartet; m, multiplet; comp, overlapping multiplets of magnetically nonequivalent protons; br, broad; app, apparent.

## Synthesis of Catalyst 5

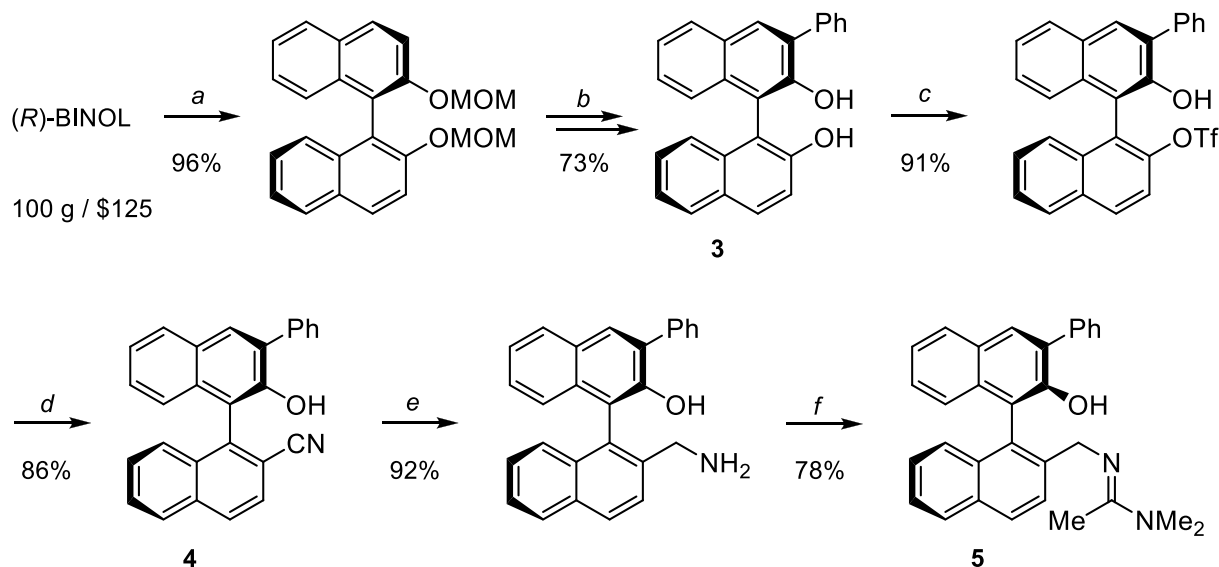

(a) Maruoka, et al.<sup>2</sup> (b) Shi, et al.<sup>3</sup> (c) EtN(*i*-Pr)<sub>2</sub>, Tf<sub>2</sub>O, DCM, -78 °C; (d) KCN, Ni(PPh<sub>3</sub>)<sub>2</sub>Br<sub>2</sub>/PPh<sub>3</sub>/Zn, CH<sub>3</sub>CN, 70 °C; (e) BH<sub>3</sub>-THF, 0 °C to reflux; HCl(aq), THF, reflux; (f) *N,N*-dimethylacetamide dimethylacetal, CH<sub>3</sub>CN.

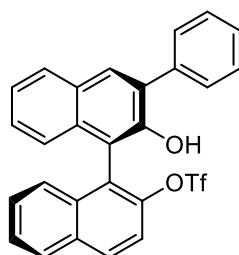

**(R)-2'-Hydroxy-3'-phenyl-1,1'-binaphthyl-2-yl trifluoromethanesulfonate.** EtN(*i*-Pr)<sub>2</sub> (4.52 g, 35.1 mmol) was added to a solution of (R)-3-phenyl-BINOL (**3**) (12.0 g, 33.2 mmol) (prepared in 4 steps from (R)-BINOL by the methods of Maruoka<sup>2</sup> and Shi<sup>3</sup> in 70% overall yield) in CH<sub>2</sub>Cl<sub>2</sub> (140 mL), and the mixture was cooled to -78 °C. A solution of trifluoromethanesulfonic anhydride (9.34 g, 33.2 mmol) in CH<sub>2</sub>Cl<sub>2</sub> (10 mL) was added, and the mixture was stirred at -78 °C for 30 min. The reaction was quenched with saturated aqueous NaHCO<sub>3</sub> (100 mL), and the layers were separated. The aqueous fraction was extracted with CH<sub>2</sub>Cl<sub>2</sub> (30 mL), and the combined organic fractions were dried (Na<sub>2</sub>SO<sub>4</sub>) and purified by column chromatography eluting with CH<sub>2</sub>Cl<sub>2</sub> to give 16.2 g (99%) of the mono-triflate as a nearly pure off-white solid. The subsequent reaction is particularly sensitive to the purity of the triflate so it must be repurified by column chromatography eluting with Et<sub>2</sub>O/hexanes (1:6) to give 14.9 g (91%) of the mono-triflate as a white solid: mp 68–69 °C; <sup>1</sup>H NMR (CDCl<sub>3</sub>, 400 MHz) δ 8.11 (d, *J* = 8.8 Hz, 1 H), 8.02 (d, *J* = 8.0 Hz, 1 H), 7.96 (s, 1 H), 7.90 (d, *J* = 8.4 Hz, 1 H), 7.68–

7.64 (comp, 2 H), 7.60–7.34 (comp, 8 H), 7.28 (td,  $J = 6.8, 1.6$  Hz, 1 H), 7.03 (d,  $J = 8.4$ , 1 H), 5.27 (s, 1 H);  $^{13}\text{C}$  NMR ( $\text{CDCl}_3$ , 100 MHz)  $\delta$  149.1, 146.0, 136.8, 133.4, 133.1, 132.8, 131.0, 130.5, 129.5, 129.2, 128.9, 128.4, 128.3, 128.2, 127.9, 127.3, 127.0, 126.7, 126.2, 124.4, 124.1, 119.8, 116.7, 112.9; IR (neat) 3538, 3061, 1421, 1215, 1140, 949, 836  $\text{cm}^{-1}$ ; HRMS (ESI)  $m/z$  calcd for  $[\text{C}_{27}\text{H}_{17}\text{F}_3\text{NaO}_4\text{S}]^+$  ( $\text{M}+\text{Na}$ ), 517.0692; found 517.0692;  $[\alpha]^{25}_{\text{D}} +20.7$  ( $c = 1.0$ ,  $\text{CHCl}_3$ ).

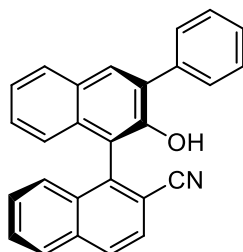

**(*R*)-2'-Hydroxy-3'-phenyl-1,1'-binaphthyl-2-carbonitrile (4).** A mixture of the triflate (above) (1.4 g, 2.8 mmol) (the purity of the triflate was critical), KCN (300 mg, 4.6 mmol),  $\text{Ni}(\text{PPh}_3)_2\text{Br}_2$  (200 mg, 0.27 mmol),  $\text{PPh}_3$  (200 mg, 0.76 mmol), and zinc (70 mg, 1.1 mmol) in oxygen-free  $\text{CH}_3\text{CN}$  (4 mL) was stirred at room temperature until the red-brown catalyst had formed (ca. 10 min). The reaction was then stirred at 70 °C for 2 h. The mixture was poured into  $\text{Et}_2\text{O}$  (100 mL), filtered, and concentrated under reduced pressure. The crude residue was purified by column chromatography eluting with  $\text{CH}_2\text{Cl}_2$  to give 905 mg (86%) of **4** as a pale yellow solid, which was used in the next step. Analytically pure material was available by triturating with  $\text{Et}_2\text{O}$  to give 830 mg (79%) of **4** as a white solid: mp 204–205 °C;  $^1\text{H}$  NMR ( $\text{CDCl}_3$ , 400 MHz)  $\delta$  8.02 (d,  $J = 8.8$  Hz, 1 H), 7.98 (d,  $J = 8.4$  Hz, 1 H), 7.95 (s, 1 H), 7.89 (d,  $J = 8.0$  Hz, 1 H), 7.81 (d,  $J = 8.4$  Hz, 1 H), 7.67–7.59 (comp, 3 H), 7.54–7.48 (comp, 3 H), 7.47–7.34 (comp, 3 H), 7.27 (td,  $J = 7.2, 1.2$  Hz, 1 H), 6.94 (d,  $J = 8.4$ , 1 H), 5.32 (s, 1 H);  $^{13}\text{C}$  NMR ( $\text{CDCl}_3$ , 100 MHz)  $\delta$  148.6, 140.8, 136.47, 135.0, 133.2, 132.3, 131.0, 130.3, 129.5, 129.4, 129.2, 128.9, 128.5, 128.4, 128.4, 127.9, 127.2, 127.1, 127.1, 124.2, 124.1, 118.5, 116.3, 112.3; IR (neat) 3535, 3365, 2228, 1428, 1260, 909, 732  $\text{cm}^{-1}$ ; HRMS (ESI)  $m/z$  calcd for  $[\text{C}_{27}\text{H}_{17}\text{NNaO}]^+$  ( $\text{M}+\text{Na}$ ), 394.1202; found 394.1202;  $[\alpha]^{25}_{\text{D}} -23.0$  ( $c = 1.0$ ,  $\text{CHCl}_3$ ).

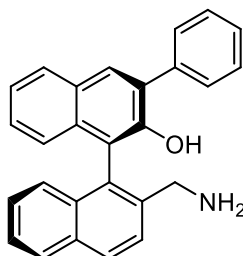

**(*R*)-2'-(Aminomethyl)-3-phenyl-1,1'-binaphthyl-2-ol.** A freshly prepared solution of  $\text{BH}_3$  in THF (20 mL, 1 M, 20 mmol)<sup>4</sup> was added to a solution of nitrile **4** (2.1 g, 5.7 mmol) in THF (10 mL) at 0 °C, and the solution was stirred at room temperature for 20 min. The temperature was gradually raised to 70 °C over 20 min, and

mixture was heated under reflux for 30 min. The mixture was cooled to 0°C, and MeOH (5 mL) was added dropwise. The solution was stirred at room temperature for 20 min and concentrated under reduced pressure. The crude solid was dissolved in THF (40 mL) and HCl [6 mL, 1 M (aq)] was added. The mixture was stirred for 5 min at room temperature, and then heated under reflux for 2 min. The solution was allowed to cool to room temperature over ca. 20 min. The mixture was poured into saturated aqueous NaHCO<sub>3</sub> (100 mL), and the organic solvent was removed under reduced pressure (20 torr, room temperature). The aqueous mixture was extracted with CH<sub>2</sub>Cl<sub>2</sub> (3 x 50 mL), and the combined organic fractions were dried (Na<sub>2</sub>SO<sub>4</sub>) and concentrated under reduced pressure. The crude residue was purified by column chromatography eluting with Et<sub>3</sub>N/CH<sub>2</sub>Cl<sub>2</sub> (1:50). The resulting solid was dissolved in CH<sub>3</sub>CN (100 mL), filtered, and concentrated under reduced pressure to give 2.0 g (92%) of the amine as a pale yellow solid: mp 123–124 °C; <sup>1</sup>H NMR (CDCl<sub>3</sub>, 400 MHz) δ 7.93 (s, 1 H), 7.91–7.85 (comp, 3 H), 7.69–7.66 (comp, 2 H), 7.45 (d, *J* = 8.4 Hz, 1 H), 7.43–7.36 (comp, 3 H), 7.33–7.26 (comp, 2 H), 7.23–7.09 (comp, 3 H), 6.78 (d, *J* = 8.4 Hz, 1 H), 4.04 (br s, 3 H), 3.61 (d, *J* = 12.0 Hz, 1 H), 3.50 (d, *J* = 12.0 Hz, 1 H); <sup>13</sup>C NMR (CDCl<sub>3</sub>, 100 MHz) δ 150.6, 138.8, 138.5, 133.7, 133.5, 133.3, 133.2, 132.6, 129.9, 129.8, 129.0, 128.8, 128.1, 128.0, 127.9, 127.1, 126.7, 126.5, 126.4, 126.2, 125.8, 124.8, 123.5, 120.7, 45.3; IR (neat) 3055, 1407, 908, 732 cm<sup>-1</sup>; HRMS (ESI) *m/z* calcd for [C<sub>27</sub>H<sub>22</sub>NO]<sup>+</sup> (M+H), 376.1696; found 376.1693; [α]<sub>D</sub><sup>24</sup> +21.3 (c = 1.0, CHCl<sub>3</sub>).

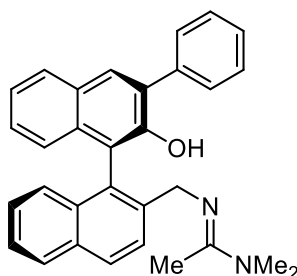

**(*R,E*)-*N'*-((2'-Hydroxy-3'-phenyl-1,1'-binaphthyl-2-yl)methyl)-*N,N*-dimethylacetimidamide (5).** *N,N*-Dimethylacetamide dimethylacetal (0.49 g, 3.3 mmol)<sup>5</sup> was added to a solution of the amine (above) (1.2 g, 3.2 mmol) in CH<sub>3</sub>CN (6 mL), and the solution was stirred at room temperature for 1 h. The mixture was concentrated under reduced pressure, and the crude residue was purified by column chromatography eluting with Et<sub>3</sub>N/MeOH/CH<sub>3</sub>CN/CH<sub>2</sub>Cl<sub>2</sub> (2:3:15:80). The resulting solid was dissolved in CH<sub>3</sub>CN (100 mL), filtered, and concentrated under reduced pressure. The yellow solid was dissolved in Et<sub>2</sub>O (10 mL), filtered, and precipitated from Et<sub>2</sub>O/hexanes to give 1.1 g (78%) of **5** as a yellow powder: mp 189–190 °C; <sup>1</sup>H NMR (CDCl<sub>3</sub>, 400 MHz) δ 9.42 (br s, 1 H), 7.94 (s, 1 H), 7.89 (d, *J* = 8.4 Hz, 1 H), 7.85 (d, *J* = 8.0 Hz, 2 H), 7.75–7.72 (comp, 2 H), 7.49 (d, *J* = 8.4 Hz, 1 H), 7.41–7.35 (comp, 3 H), 7.32–7.22 (comp, 2 H), 7.20–7.14 (comp, 2 H), 7.12 (t, *J* = 8.0 Hz, 1 H), 6.89 (d, *J* = 8.4 Hz, 1 H), 4.28 (d, *J* = 12.8 Hz, 1 H), 4.18 (d, *J* = 12.8 Hz, 1 H), 2.76 (s, 6 H), 1.85 (s, 3 H); <sup>13</sup>C NMR (CDCl<sub>3</sub>, 100 MHz) δ 159.3, 153.1, 139.5, 137.8, 137.7, 134.7, 133.9, 133.5, 133.3,

130.0, 129.2, 128.6, 128.3, 127.9, 127.8, 127.7, 127.5, 127.0, 126.6, 126.0, 125.7, 125.4, 125.0, 122.9, 122.5, 53.9, 38.7, 13.6; IR (neat) 3053, 1632, 1411, 908, 731  $\text{cm}^{-1}$ ; HRMS (ESI)  $m/z$  calcd for  $[\text{C}_{31}\text{H}_{29}\text{N}_2\text{O}]^+$  (M+H), 445.2274; found 445.2275;  $[\alpha]_D^{24} +197.7$  ( $c = 1.0$ ,  $\text{CHCl}_3$ ).

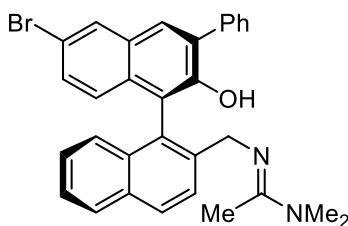

**(*R,E*)-*N'*-((6'-Bromo-2'-hydroxy-3'-phenyl-1,1'-binaphthyl-2-yl)methyl)-*N,N*-dimethylacetimidamide (6-Br-5).** A solution of 2,4,4,6-tetrabromocyclohexadienone (TBCO) (0.092 g, 0.225 mmol) in  $\text{CH}_2\text{Cl}_2$  (1 mL) was added dropwise to a solution of **5** (0.100 g, 0.225 mmol) and propionic acid (0.033 g, 0.450 mmol) in toluene (2 mL) at  $-50^\circ\text{C}$ , and the reaction was stirred for 20 min. The reaction was quenched with saturated aqueous  $\text{Na}_2\text{SO}_3$  (3 mL), and the mixture was stirred vigorously at room temperature. The mixture was diluted with  $\text{Et}_2\text{O}$  (10 mL), washed with water (3 mL) and 5% aqueous  $\text{Na}_2\text{CO}_3$  (2 x 5 mL). The organic fraction was dried ( $\text{MgSO}_4$ ) and purified by column chromatography, eluting with  $\text{Et}_3\text{N}/\text{MeOH}/\text{CH}_3\text{CN}/\text{CH}_2\text{Cl}_2$  (2:3:15:80). The resulting solid was dissolved in  $\text{CH}_3\text{CN}$  (20 mL), filtered, and concentrated under reduced pressure. The yellow solid was dissolved in  $\text{Et}_2\text{O}$  (10 mL), filtered, and precipitated from  $\text{Et}_2\text{O}$ /hexanes to give 0.100 g (85%) of 6-Br-**5** as a yellow powder: mp  $115\text{--}116^\circ\text{C}$ ;  $^1\text{H}$  NMR ( $\text{CDCl}_3$ , 400 MHz)  $\delta$  8.88 (br s, 1 H), 7.98 (d,  $J = 1.2$  Hz, 1 H), 7.89–7.82 (comp, 3 H), 7.73–7.70 (comp, 2 H), 7.48–7.44 (m, 1 H), 7.41–7.35 (comp, 4 H), 7.33–7.27 (m, 1 H), 7.19 (td,  $J = 8.4, 1.2$  Hz, 1 H), 7.16–7.12 (comp, 2 H), 6.71 (d,  $J = 8.8$  Hz, 1 H), 4.28 (d,  $J = 13.2$  Hz, 1 H), 4.17 (d,  $J = 13.2$  Hz, 1 H), 2.78 (s, 6 H), 1.89 (s, 3 H);  $^{13}\text{C}$  NMR ( $\text{CDCl}_3$ , 100 MHz)  $\delta$  159.6, 154.8, 149.2, 139.3, 136.8, 136.1, 134.0, 133.4, 133.3, 132.6, 129.9, 129.7, 128.7, 128.4, 128.2, 127.9, 127.7, 127.5, 126.9, 126.7, 126.6, 126.2, 125.5, 122.2, 116.0, 53.5, 38.9, 13.8; IR (neat) 3055, 2930, 1633, 1415, 908, 731  $\text{cm}^{-1}$ ; HRMS (ESI)  $m/z$  calcd for  $[\text{C}_{31}\text{H}_{28}\text{BrN}_2\text{O}]^+$  (M+H), 523.1380; found 523.1377;  $[\alpha]_D^{25} +130.1$  ( $c = 1.0$ ,  $\text{CHCl}_3$ ).

## Synthesis of Olefinic Acids

All olefinic acids were made by literature procedures as follows: (*Z*)-5-alkyl-4-enoic acids **6a-e** were made at the specified temperature by the method of Yeung, et al.,<sup>6</sup> and were isolated as the specified mixture of *Z* and *E* isomers (determined by  $^1\text{H}$  NMR); (*E*)-6-methylhept-4-enoic acid (**E-6c**) was made by the method of Kaga, et al.;<sup>7</sup> (*E*)-5-aryl-4-enoic acids **6f-h** were made by the method of Yeung, et al.;<sup>6</sup> 4-aryl-4-enoic acids **9a-c** were made by the method of Yeung, et al.;<sup>8</sup> (*E*)-4-methylhex-4-enoic acid (**9d**) was made by the methods of Back, et

al., and Mane, et al.;<sup>9</sup> 2-(2-phenylallyloxy)acetic acid (**9e**) was made by the method of Fujioka, et al.;<sup>10</sup> (*E*)-2-(2-methylbut-2-enyloxy)acetic acid (**9f**) was made by the method of Suginome, et al.;<sup>11</sup> cyclohexa-2,5-dienecarboxylic acid **12** was made by Birch reduction of benzoic acid.<sup>12</sup> Characterization data is reported below for compounds that have not previously been characterized.

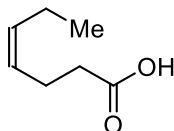

**(Z)-Hept-4-enoic acid (6a).** Wittig reaction executed on a 10.0 mmol scale at  $-40\text{ }^{\circ}\text{C}$ , to give 1.09 g (85%) of **6a** as a clear, colorless oil: 20:1 *Z/E* ratio;  $^1\text{H}$  NMR ( $\text{CDCl}_3$ , 400 MHz)  $\delta$  5.48–5.40 (m, 1 H), 5.35–5.29 (m, 1 H), 2.44–2.33 (comp, 4 H), 2.15–2.02 (m, 2 H), 0.96 (t,  $J = 7.6$  Hz, 3 H);  $^{13}\text{C}$  NMR ( $\text{CDCl}_3$ , 100 MHz)  $\delta$  179.8, 133.5, 126.3, 34.2, 22.4, 20.5, 14.2; IR (neat)  $1712\text{ cm}^{-1}$ ; HRMS (ESI)  $m/z$  calcd for  $[\text{C}_7\text{H}_{11}\text{O}_2]^-$  (M–H), 127.0765; found 127.0762.

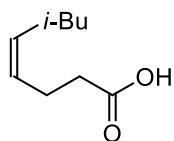

**(Z)-7-Methyloct-4-enoic acid (6b).** Wittig reaction executed on a 5.0 mmol scale at  $-55\text{ }^{\circ}\text{C}$ , to give 0.7 g (90%) of **6b** as a clear, colorless oil: 22:1 *Z/E* ratio;  $^1\text{H}$  NMR ( $\text{CDCl}_3$ , 400 MHz)  $\delta$  10.71 (br s, 1 H), 5.49–5.36 (comp, 2 H), 2.43–2.33 (comp, 4 H), 1.94 (t,  $J = 6.8$  Hz, 2 H), 1.61 (septet,  $J = 6.6$  Hz, 1 H), 0.89 (d,  $J = 6.6$  Hz, 6 H);  $^{13}\text{C}$  NMR ( $\text{CDCl}_3$ , 100 MHz)  $\delta$  179.7, 130.5, 127.6, 36.3, 36.2, 34.1, 28.5, 22.6, 22.3; IR (neat) 2957, 1713, 1413, 1291,  $933\text{ cm}^{-1}$ ; HRMS (ESI)  $m/z$  calcd for  $[\text{C}_9\text{H}_{15}\text{O}_2]^-$  (M–H), 155.1078; found 155.1075.

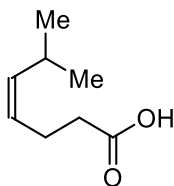

**(Z)-6-Methylhept-4-enoic acid (6c).** Wittig reaction executed on a 7.8 mmol scale at  $-40\text{ }^{\circ}\text{C}$ , to give 0.7 g (62%) of **6c** as a clear, colorless oil: 26:1 *Z/E* ratio;  $^1\text{H}$  NMR ( $\text{CDCl}_3$ , 400 MHz)  $\delta$  11.25 (br s, 1 H), 5.30–5.18 (comp, 2 H), 2.65–2.58 (m, 1 H), 2.44–2.37 (comp 4 H), 0.94 (d,  $J = 6.8$  Hz, 6 H);  $^{13}\text{C}$  NMR ( $\text{CDCl}_3$ , 100 MHz)  $\delta$  179.8, 139.3, 124.5, 34.4, 26.5, 23.1, 22.6; IR (neat) 2960, 1713, 1413, 1281, 931,  $746\text{ cm}^{-1}$ ; HRMS (ESI)  $m/z$  calcd  $[\text{C}_8\text{H}_{13}\text{O}_2]^-$  (M–H), 141.0921; found 141.0919.

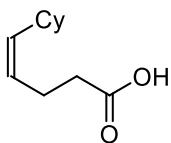

**(Z)-5-Cyclohexylpent-4-enoic acid (6d).** Wittig reaction executed on a 5.0 mmol scale at  $-50\text{ }^{\circ}\text{C}$ ; additional purification by heating at  $80\text{ }^{\circ}\text{C}$  under vacuum for 5 h gave 0.3 g (34%) of **6d** as a clear, colorless oil:  $>50:1$  *Z/E* ratio;  $^1\text{H}$  NMR ( $\text{CDCl}_3$ , 400 MHz)  $\delta$  11.33 (br s, 1 H), 5.31–5.19 (comp, 2 H), 2.42–2.35 (comp, 4 H), 2.32–2.20 (m, 1 H), 1.72–1.56 (comp, 5 H), 1.34–1.00 (comp, 5 H);  $^{13}\text{C}$  NMR ( $\text{CDCl}_3$ , 100 MHz)  $\delta$  179.86, 137.86, 124.99, 36.30, 34.46, 33.23, 25.99, 25.87, 22.73; IR (neat) 2925, 2850, 1712, 1448, 1279,  $947\text{ cm}^{-1}$ ; HRMS (ESI)  $m/z$  calcd for  $[\text{C}_{11}\text{H}_{17}\text{O}_2]^-$  (M–H), 181.1234; found 181.1231.

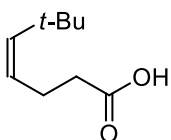

**(Z)-6,6-Dimethylhept-4-enoic acid (6e).** Wittig reaction executed on a 5.0 mmol scale to give 0.6 g (82%) of **6e** as a clear, colorless oil:  $>50:1$  *Z/E* ratio;  $^1\text{H}$  NMR ( $\text{CDCl}_3$ , 400 MHz)  $\delta$  11.57 (br s, 1 H), 5.38 (dt,  $J = 12.0, 1.6\text{ Hz}$ , 1 H), 5.16–5.08 (m, 1 H), 2.56–2.49 (comp, 2 H), 2.43–2.38 (comp, 2 H), 1.12 (s, 9 H);  $^{13}\text{C}$  NMR ( $\text{CDCl}_3$ , 100 MHz)  $\delta$  179.8, 141.5, 125.8, 34.6, 33.3, 31.1, 31.0, 26.9, 23.5; IR (neat) 2958, 1713, 1414, 1283,  $1209, 935\text{ cm}^{-1}$ ; HRMS (ESI)  $m/z$  calcd for  $[\text{C}_9\text{H}_{15}\text{O}_2]^-$  (M–H), 155.1078; found 155.1076.

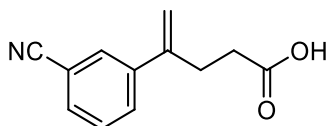

**4-(3-Cyanophenyl)pent-4-enoic acid (9b)** was isolated in 30% yield (2 steps) as a white solid: mp  $70\text{--}71\text{ }^{\circ}\text{C}$ ;  $^1\text{H}$  NMR ( $\text{CDCl}_3$ , 300 MHz)  $\delta$  11.21 (br s, 1 H), 7.69–7.56 (comp, 3 H), 7.48–7.43 (m, 1 H), 5.38 (s, 1 H), 5.23 (s, 1 H), 2.84 (t,  $J = 7.5\text{ Hz}$ , 2 H), 2.54 (t,  $J = 7.2\text{ Hz}$ , 2 H);  $^{13}\text{C}$  NMR ( $\text{CDCl}_3$ , 75 MHz)  $\delta$  178.8, 144.6, 141.8, 131.1, 130.4, 129.8, 129.3, 118.7, 115.1, 112.7, 32.5, 29.7; IR (neat) 3087, 2919, 2231, 1711, 1416, 1275,  $1215, 902, 804\text{ cm}^{-1}$ ; HRMS (CI)  $m/z$  calcd for  $[\text{C}_{12}\text{H}_{11}\text{NO}_2]^+$  (M+H), 201.0790; found 201.0789.

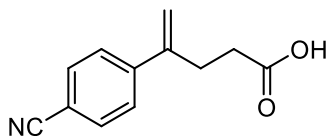

**4-(4-Cyanophenyl)pent-4-enoic acid (9c)** was isolated in 43% yield (2 steps) as a white solid: mp  $89\text{--}90\text{ }^{\circ}\text{C}$ ;  $^1\text{H}$  NMR ( $\text{CDCl}_3$ , 300 MHz)  $\delta$  10.48 (br s, 1 H), 7.63 (dd,  $J = 6.6, 1.8\text{ Hz}$ , 2 H), 7.49 (dd,  $J = 6.6, 2.1\text{ Hz}$ , 2

H), 5.43 (s, 1 H), 5.26 (s, 1 H), 2.84 (t,  $J = 7.5$  Hz, 2 H), 2.54 (t,  $J = 7.2$  Hz, 2 H);  $^{13}\text{C}$  NMR ( $\text{CDCl}_3$ , 75 MHz)  $\delta$  178.5, 145.1, 145.1, 132.3, 126.7, 118.7, 115.8, 111.3, 32.6, 29.6; IR (neat) 2926, 2232, 1704, 908, 841  $\text{cm}^{-1}$ ; HRMS (CI)  $m/z$  calcd for  $[\text{C}_{12}\text{H}_{11}\text{NO}_2]^+$  (M+H), 201.0790; found 201.0789.

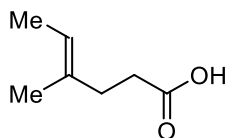

**(E)-4-Methylhex-4-enoic acid (9d)** was isolated in 76% yield as a clear, colorless oil: 36:1 *E/Z* ratio;  $^1\text{H}$  NMR ( $\text{CDCl}_3$ , 400 MHz)  $\delta$  11.64 (br s, 1 H), 5.29–5.23 (m, 1 H), 2.48–2.43 (comp, 2 H), 2.31 (t,  $J = 7.6$  Hz, 2 H), 1.62 (t,  $J = 1.0$ , 3 H), 1.59–1.55 (comp, 3 H);  $^{13}\text{C}$  NMR ( $\text{CDCl}_3$ , 100 MHz)  $\delta$  180.2, 133.6, 119.4, 32.2, 32.9, 15.5, 13.3; IR (neat) 2980, 2920, 1712, 1413, 1300, 938  $\text{cm}^{-1}$ ; HRMS (ESI)  $m/z$  calcd for  $[\text{C}_7\text{H}_{11}\text{O}_2]^-$  (M–H), 127.0765; found 127.0765.

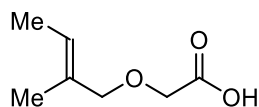

**(E)-2-(2-Methylbut-2-enyloxy)acetic acid (9f)** was isolated in 92% yield as a white solid: mp 46–47 °C, >50:1 *E/Z* ratio;  $^1\text{H}$  NMR ( $\text{CDCl}_3$ , 400 MHz)  $\delta$  10.43 (br s, 1 H), 5.57–5.50 (m, 1 H), 4.06 (s, 2 H), 3.98 (s, 2 H), 1.67–1.63 (comp, 6 H);  $^{13}\text{C}$  NMR ( $\text{CDCl}_3$ , 100 MHz)  $\delta$  175.5, 140.5, 131.5, 124.7, 65.7, 13.4, 13.2; IR (neat) 2919, 1731, 1432, 1245, 1112  $\text{cm}^{-1}$ ; HRMS (ESI)  $m/z$  calcd for  $[\text{C}_7\text{H}_{11}\text{O}_3]^-$  (M–H), 143.0714; found 143.0712.

## General Procedure for Enantioselective Bromolactonization

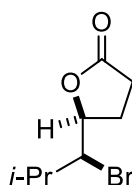

**(S)-5-((S)-1-Bromo-2-methylpropyl)dihydrofuran-2(3H)-one (7c).** A solution of TBCO (0.197 g, 0.480 mmol) in  $\text{CH}_2\text{Cl}_2$  (4 mL) was added dropwise to a solution of (Z)-6-methylhept-4-enoic acid **6c** (0.057 g, 0.400 mmol) and catalyst **5** (0.018 g, 0.040 mmol) in toluene (8 mL) at  $-50$  °C, and the solution was stirred for 14 h. The reaction was quenched with saturated aqueous  $\text{Na}_2\text{SO}_3$  (10 mL), and the mixture was warmed to room temperature with vigorous stirring. The mixture was diluted with  $\text{Et}_2\text{O}$  (40 mL) and water (10 mL), and the organic fraction was washed with 5% aqueous  $\text{Na}_2\text{CO}_3$  (2 x 20 mL), dried ( $\text{MgSO}_4$ ), filtered and concentrated

under reduced pressure. The crude residue was purified by column chromatography, eluting with DCM/toluene (2:1) to give 0.083 g (94%) of **7c** as a clear, colorless oil:  $^1\text{H}$  NMR ( $\text{CDCl}_3$ , 400 MHz)  $\delta$  4.76–4.71 (m, 1 H), 3.87 (dd,  $J$  = 6.0, 3.6 Hz, 1 H), 2.76–2.66 (m, 1 H), 2.59–1.48 (m, 1 H), 2.44–2.33 (m, 1 H), 2.22–2.06 (comp, 2 H), 1.10 (d,  $J$  = 6.4 Hz, 6 H);  $^{13}\text{C}$  NMR ( $\text{CDCl}_3$ , 100 MHz)  $\delta$  176.4, 79.9, 66.8, 32.8, 28.3, 26.7, 21.2, 20.3; IR (neat) 2966, 2933, 2876, 1769, 1176, 1022, 908  $\text{cm}^{-1}$ ; HRMS (ESI)  $m/z$  calcd for  $[\text{C}_8\text{H}_{13}\text{BrNaO}_2]^+$  ( $\text{M}+\text{Na}$ ), 242.9991; found 242.9992;  $[\alpha]^{25}_{\text{D}} +53.0$  ( $c$  = 1.0,  $\text{CHCl}_3$ ); HPLC (210 nm): Whelk-O1 (20% *i*-PrOH / hexanes, 1.2 mL/min) 17.4 min (minor), 20.3 min (major); 97:3 er.

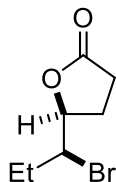

**(S)-5-((S)-1-Bromopropyl)dihydrofuran-2(3H)-one (7a).** Isolated 0.074 g (90%) of **7a** as a clear, colorless oil:  $^1\text{H}$  NMR ( $\text{CDCl}_3$ , 300 MHz)  $\delta$  4.72–4.64 (m, 1 H), 4.04–3.93 (m, 1 H), 2.78–2.65 (m, 1 H), 2.62–2.33 (comp, 2 H), 2.28–2.14 (m, 1 H), 2.05–1.88 (comp, 2 H), 1.12 (t,  $J$  = 7.2 Hz, 3 H);  $^{13}\text{C}$  NMR ( $\text{CDCl}_3$ , 75 MHz)  $\delta$  176.5, 80.7, 59.8, 28.2, 27.9, 25.3, 12.4; IR (neat) 1774  $\text{cm}^{-1}$ ; HRMS (CI)  $m/z$  calcd for  $[\text{C}_7\text{H}_{12}\text{BrO}_2]^+$  ( $\text{M}+\text{H}$ ), 207.0021; found 207.0022;  $[\alpha]^{23}_{\text{D}} +5.3$  ( $c$  = 1.0,  $\text{CHCl}_3$ ); HPLC (210 nm): Whelk-O1 (20% *i*-PrOH / hexanes, 1.2 mL/min) 15.5 min (minor), 18.9 min (major); 85:15 er.

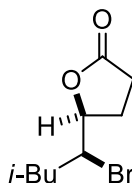

**(S)-5-((S)-1-Bromo-3-methylbutyl)dihydrofuran-2(3H)-one (7b).** Reaction executed on a 0.21 mmol scale, to give 0.043 g (87%) of **7b** as a clear, colorless oil:  $^1\text{H}$  NMR ( $\text{CDCl}_3$ , 300 MHz)  $\delta$  4.63 (ddd,  $J$  = 7.8, 6.3, 3.3 Hz, 1 H), 4.13 (dt,  $J$  = 10.5, 3.6 Hz, 1 H), 2.76–2.65 (m, 1 H), 2.61–2.45 (m, 1 H), 2.45–2.34 (m, 1 H), 2.27–2.15 (m, 1 H), 2.00–1.88 (comp, 2 H), 1.62–1.53 (m, 1 H), 0.97 (d,  $J$  = 6.3 Hz, 3 H), 0.91 (d,  $J$  = 6.6 Hz, 3 H);  $^{13}\text{C}$  NMR ( $\text{CDCl}_3$ , 75 MHz)  $\delta$  176.5, 81.1, 56.2, 43.0, 28.2, 25.9, 25.3, 23.0, 20.8; IR (neat) 2959, 2872, 1779, 1468, 1369, 1179, 1056, 1014, 913  $\text{cm}^{-1}$ ; HRMS (CI)  $m/z$  calcd for  $[\text{C}_9\text{H}_{16}\text{O}_2\text{Br}]^+$  ( $\text{M}+\text{H}$ ), 235.0334; found 235.0336;  $[\alpha]^{24}_{\text{D}} +2.7$  ( $c$  = 1.0,  $\text{CHCl}_3$ ); HPLC (210 nm): Whelk-O1 (20% *i*-PrOH / hexanes, 1.2 mL/min) 12.2 min (minor), 17.5 min (major); 95:5 er.

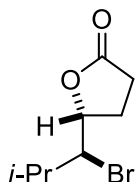

**(R)-5-((S)-1-Bromo-2-methylpropyl)dihydrofuran-2(3H)-one (diastereo-7c).** Isolated 0.087 g (98%) of **diastereo-7c** as a clear, colorless oil:  $^1\text{H}$  NMR ( $\text{CDCl}_3$ , 300 MHz)  $\delta$  4.64 (m, 1 H), 3.95 (dd,  $J = 9.0, 3.3$  Hz, 1 H), 2.61–2.50 (comp, 3 H), 2.22–2.10 (comp, 2 H), 1.04 (d,  $J = 6.6$  Hz, 3 H), 1.00 (d,  $J = 6.3$  Hz, 3 H);  $^{13}\text{C}$  NMR ( $\text{CDCl}_3$ , 75 MHz)  $\delta$  176.3, 79.5, 65.8, 30.1, 28.5, 27.6, 21.3, 16.9; IR (neat) 2967, 1785, 1463, 1174, 1022, 912  $\text{cm}^{-1}$ ; HRMS (CI)  $m/z$  calcd for  $[\text{C}_8\text{H}_{14}\text{O}_2\text{Br}]^+$  ( $\text{M}+\text{H}$ ), 221.0177; found 221.0178;  $[\alpha]^{24}_{\text{D}} +13.7$  ( $c = 1.0$ ,  $\text{CHCl}_3$ ); HPLC (210 nm): OD-H (0.5% *i*-PrOH / hexanes, 1.0 mL/min) 27.6 min (major), 31.3 min (minor); 71:29 er.

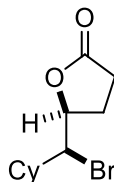

**(S)-5-((S)-Bromo(cyclohexyl)methyl)dihydrofuran-2(3H)-one (7d).** Isolated 0.098 g (94%) of **7d** as a clear, colorless oil:  $^1\text{H}$  NMR ( $\text{CDCl}_3$ , 400 MHz)  $\delta$  4.84–4.76 (m, 1 H), 3.86 (dd,  $J = 6.8, 3.2$  Hz, 1 H), 2.79–2.67 (m, 1 H), 2.58–2.46 (m, 1 H), 2.43–2.31 (m, 1 H), 2.27–2.14 (m, 1 H), 2.10–2.01 (m, 1 H), 1.92–1.72 (comp, 4 H), 1.71–1.62 (m, 1 H), 1.38–1.08 (comp, 5 H);  $^{13}\text{C}$  NMR ( $\text{CDCl}_3$ , 100 MHz)  $\delta$  176.6, 78.8, 66.4, 42.3, 31.3, 31.2, 28.2, 26.6, 26.1, 26.0, 25.9; IR (neat) 2926, 2852, 1768, 1177  $\text{cm}^{-1}$ ; HRMS (ESI)  $m/z$  calcd for  $[\text{C}_{11}\text{H}_{17}\text{BrNaO}_2]^+$  ( $\text{M}+\text{Na}$ ), 283.0304; found 283.0305;  $[\alpha]^{24}_{\text{D}} +40.7$  ( $c = 1.0$ ,  $\text{CHCl}_3$ ); HPLC (210 nm): Whelk-O1 (20% *i*-PrOH / hexanes, 1.2 mL/min) 17.1 min (minor), 24.0 min (major); 98.5:1.5 er.

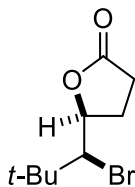

**(S)-5-((S)-1-Bromo-2,2-dimethylpropyl)dihydrofuran-2(3H)-one (7e).** Isolated 0.091 g (97%) of **7e** as a white solid: mp 126–127  $^{\circ}\text{C}$ ;  $^1\text{H}$  NMR ( $\text{CDCl}_3$ , 300 MHz)  $\delta$  4.85 (ddd,  $J = 8.1, 6.0, 1.2$  Hz, 1 H), 3.85 (d,  $J = 0.9$  Hz, 1 H), 2.76–2.65 (m, 1 H), 2.53–2.40 (m, 1 H), 2.39–2.31 (m, 1 H), 2.27–2.17 (m, 1 H), 1.16 (s, 9 H);  $^{13}\text{C}$  NMR ( $\text{CDCl}_3$ , 75 MHz)  $\delta$  176.9, 77.3, 72.4, 36.7, 28.3, 27.6, 27.4; IR (neat) 2977, 2938, 1766, 1353, 1184, 1065, 1025, 993, 921  $\text{cm}^{-1}$ ; HRMS (CI)  $m/z$  calcd for  $[\text{C}_9\text{H}_{16}\text{O}_2\text{Br}]^+$  ( $\text{M}+\text{H}$ ), 235.0334; found 235.0334;  $[\alpha]^{24}_{\text{D}}$

+55.7 (c = 1.0, CHCl<sub>3</sub>); HPLC (210 nm): Whelk-O1 (20% *i*-PrOH / hexanes, 1.2 mL/min) 10.7 min (minor), 14.3 min (major); 97:3 er.

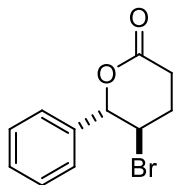

**(5*R*,6*S*)-5-Bromo-6-phenyltetrahydro-2*H*-pyran-2-one (8f).** Reaction executed on a 0.100 mmol scale at –60 °C, to give 0.024 g (94%) of **8f** as a white solid: mp 132–133 °C; spectra matched previously reported data;<sup>6</sup> [ $\alpha$ ]<sub>D</sub><sup>23</sup> –6.0 (c = 1.0, CHCl<sub>3</sub>); HPLC (210 nm): Whelk-O1 (3% CH<sub>3</sub>CN / 20% *i*-PrOH / hexanes, 1.2 mL/min) 14.6 min (minor), 19.8 min (major); 98:2 er.

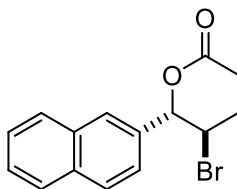

**(5*R*,6*S*)-5-Bromo-6-(naphthalen-2-yl)tetrahydro-2*H*-pyran-2-one (8g).** Isolated 0.118 g (97%) of **8g** as a white solid: mp 107–108 °C; spectra matched previously reported data;<sup>6</sup> [ $\alpha$ ]<sub>D</sub><sup>22</sup> +32.5 (c = 1.0, CHCl<sub>3</sub>); HPLC (225 nm): Whelk-O1 (6% CH<sub>3</sub>CN / 20% *i*-PrOH / hexanes, 1.2 mL/min) 14.0 min (minor), 24.5 min (major); 96:4 er.

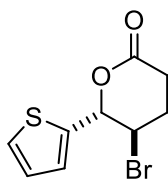

**(5*R*,6*S*)-5-Bromo-6-(thiophen-2-yl)tetrahydro-2*H*-pyran-2-one (8h).** Isolated 0.096 g (92%) of **8h** as a white solid: mp 95–96 °C; spectra matched previously reported data;<sup>6</sup> [ $\alpha$ ]<sub>D</sub><sup>22</sup> +5.7 (c = 1.0, CHCl<sub>3</sub>); HPLC (233 nm): Whelk-O1 (3% CH<sub>3</sub>CN / 20% *i*-PrOH / hexanes, 1.2 mL/min) 12.9 min (minor), 21.6 min (major); 94:6 er.

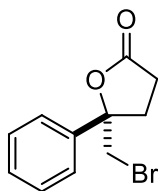

**(S)-5-(Bromomethyl)-5-phenyldihydrofuran-2(3H)-one (10a).** Isolated 0.101 g (99%) of **10a** as a semi-solid; spectra consistent with the data previously reported for the enantiomer of **10a**;  $[\alpha]^{25}_{\text{D}} -26.3$  ( $c = 1.0$ ,  $\text{CHCl}_3$ ); HPLC (210 nm): Whelk-O1 (20% *i*-PrOH / hexanes, 1.2 mL/min) 16.0 min (minor), 23.8 min (major); 86:14 er.

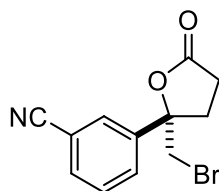

**(S)-3-(2-(Bromomethyl)-5-oxotetrahydrofuran-2-yl)benzonitrile (10b).** Reaction executed on 0.1 mmol scale, to give 0.025 g (89%) of **10b** as a clear, colorless oil:  $^1\text{H}$  NMR ( $\text{CDCl}_3$ , 300 MHz)  $\delta$  7.75–7.66 (comp, 3 H), 7.59–7.53 (m, 1 H), 3.72 (d,  $J = 11.4$  Hz, 1 H), 3.68 (d,  $J = 11.1$  Hz, 1 H), 2.90–2.77 (comp, 2 H), 2.65–2.53 (comp, 2 H);  $^{13}\text{C}$  NMR ( $\text{CDCl}_3$ , 75 MHz)  $\delta$  174.6, 142.4, 132.3, 129.8, 129.5, 128.8, 118.1, 113.1, 85.4, 40.1, 32.4, 28.7; IR (neat) 2962, 2231, 1788, 1483, 1421, 1243, 1164, 1041, 921  $\text{cm}^{-1}$ ; HRMS (CI)  $m/z$  calcd for  $[\text{C}_{12}\text{H}_{11}\text{NO}_2\text{Br}]^+$  ( $\text{M}+\text{H}$ ), 279.9973; found 279.9973;  $[\alpha]^{25}_{\text{D}} -35.3$  ( $c = 1.0$ ,  $\text{CHCl}_3$ ); HPLC (225 nm): Whelk-O1 (6%  $\text{CH}_3\text{CN}$  / 20% *i*-PrOH / hexanes, 1.2 mL/min) 11.5 min (minor), 12.5 min (major); 91:9 er.

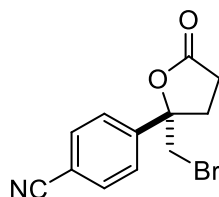

**(S)-4-(2-(Bromomethyl)-5-oxotetrahydrofuran-2-yl)benzonitrile (10c).** Isolated 0.102 g (92%) of **10c** as a white solid: mp 154–155  $^{\circ}\text{C}$ ;  $^1\text{H}$  NMR ( $\text{CDCl}_3$ , 300 MHz)  $\delta$  7.73 (d,  $J = 8.7$  Hz, 2 H), 7.56 (d,  $J = 8.7$  Hz, 2 H), 3.72 (d,  $J = 11.4$  Hz, 1 H), 3.68 (d,  $J = 11.4$  Hz, 1 H), 2.89–2.82 (comp, 2 H), 2.59–2.52 (comp, 2 H);  $^{13}\text{C}$  NMR ( $\text{CDCl}_3$ , 75 MHz)  $\delta$  174.6, 145.8, 132.6, 125.9, 118.0, 112.8, 85.7, 40.0, 32.5, 28.8; IR (neat) 2962, 2230, 1787, 1162, 1044, 841  $\text{cm}^{-1}$ ; HRMS (CI)  $m/z$  calcd for  $[\text{C}_{12}\text{H}_{11}\text{NO}_2\text{Br}]^+$  ( $\text{M}+\text{H}$ ), 279.9973; found 279.9975;  $[\alpha]^{25}_{\text{D}} -36.0$  ( $c = 0.5$ ,  $\text{CHCl}_3$ ); HPLC (230 nm): Whelk-O1 (6%  $\text{CH}_3\text{CN}$  / 20% *i*-PrOH / hexanes, 1.2 mL/min) 13.8 min (minor), 15.2 min (major); 94:6 er.

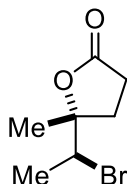

**(R)-5-((S)-1-bromoethyl)-5-methyldihydrofuran-2(3H)-one (10d).** Isolated 0.074 g (89%) of **10d** as a clear, colorless oil:  $^1\text{H}$  NMR ( $\text{CDCl}_3$ , 300 MHz)  $\delta$  4.18 (q,  $J = 6.9$  Hz, 1 H), 2.67 (dt,  $J = 8.1, 0.9$  Hz, 2 H), 2.67 (dt,  $J = 13.2, 9.2$  Hz, 1 H), 2.11 (dt,  $J = 13.2, 7.8$  Hz, 1 H), 1.74 (d,  $J = 6.6$  Hz, 3 H), 1.52 (s, 3 H);  $^{13}\text{C}$  NMR ( $\text{CDCl}_3$ , 75 MHz)  $\delta$  175.8, 87.2, 54.9, 32.0, 29.1, 21.5, 20.8; IR (neat) 2983, 2937, 1778, 1451, 1384, 1192, 1147, 1074, 940  $\text{cm}^{-1}$ ; HRMS (CI)  $m/z$  calcd for  $[\text{C}_7\text{H}_{12}\text{O}_2\text{Br}]$  ( $\text{M}+\text{H}$ ) $^+$ , 207.0021; found 207.0022;  $[\alpha]^{23}_{\text{D}} +5.3$  ( $c = 1.0$ ,  $\text{CHCl}_3$ ); HPLC (210 nm): Whelk-O1 (20% *i*-PrOH / hexanes, 1.2 mL/min) 13.1 min (minor), 14.4 min (major); 71:29 er.

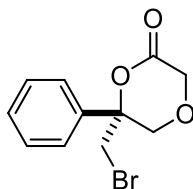

**(R)-6-(Bromomethyl)-6-phenyl-1,4-dioxan-2-one (11e).** Isolated 0.106 g (98%) of **11e** as a white solid: mp 88–90  $^{\circ}\text{C}$ ; spectra matched previously reported data;<sup>10</sup>  $[\alpha]^{23}_{\text{D}} -10.0$  ( $c = 1.0$ ,  $\text{CHCl}_3$ ); HPLC (210 nm): Whelk-O1 (20% *i*-PrOH / hexanes, 1.2 mL/min) 18.9 min (minor), 22.7 min (major); 86:14 er.

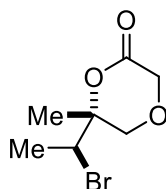

**(R)-6-((S)-1-bromoethyl)-6-methyl-1,4-dioxan-2-one (11f).** Isolated 0.083 g (93%) of **11f** as a clear, colorless oil:  $^1\text{H}$  NMR ( $\text{CDCl}_3$ , 300 MHz)  $\delta$  4.35–4.28 (comp, 3 H), 4.05 (d,  $J = 12.9$  Hz, 1 H), 3.76 (d, 12.6 Hz, 1 H), 1.78 (d,  $J = 6.9$  Hz, 3 H), 1.53 (s, 3 H);  $^{13}\text{C}$  NMR ( $\text{CDCl}_3$ , 75 MHz)  $\delta$  166.4, 84.1, 69.8, 65.4, 49.4, 19.5, 17.6; IR (neat) 2986, 2941, 1747, 1456, 1268, 1104  $\text{cm}^{-1}$ ; HRMS (CI)  $m/z$  calcd for  $[\text{C}_7\text{H}_{12}\text{O}_3\text{Br}]^+$  ( $\text{M}+\text{H}$ ) $^+$ , 222.9970; found 222.9972;  $[\alpha]^{24}_{\text{D}} -26.7$  ( $c = 0.5$ ,  $\text{CHCl}_3$ ); HPLC (210 nm): Whelk-O1 (20% *i*-PrOH / hexanes, 1.2 mL/min) 9.9 min (major), 11.2 min (minor); 85:15 er.

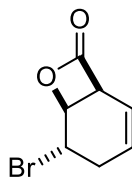

**(1*S*,5*S*,6*S*)-5-bromo-7-oxabicyclo[4.2.0]oct-2-en-8-one (13).** Reaction executed in CH<sub>2</sub>Cl<sub>2</sub>/toluene (1:1, 12 mL) for 4 d, to give 0.058 g (72%) of **13** as a white solid: mp 96–98 °C; spectra matched the data previously reported for racemic **13**;<sup>13</sup> [ $\alpha$ ]<sub>D</sub><sup>23</sup> +49.0 (c = 1.0, CHCl<sub>3</sub>); HPLC (210 nm): OD-H (1% *i*-PrOH / hexanes, 1.0 mL/min) 31.0 min (minor), 33.5 min (major); 73:27 er.

## HPLC traces

(7a) Whelk-O1, 20% IPA / hexanes, 1.2 mL/min. obs: 210 nm.

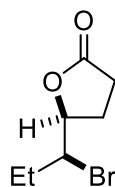

RAC:

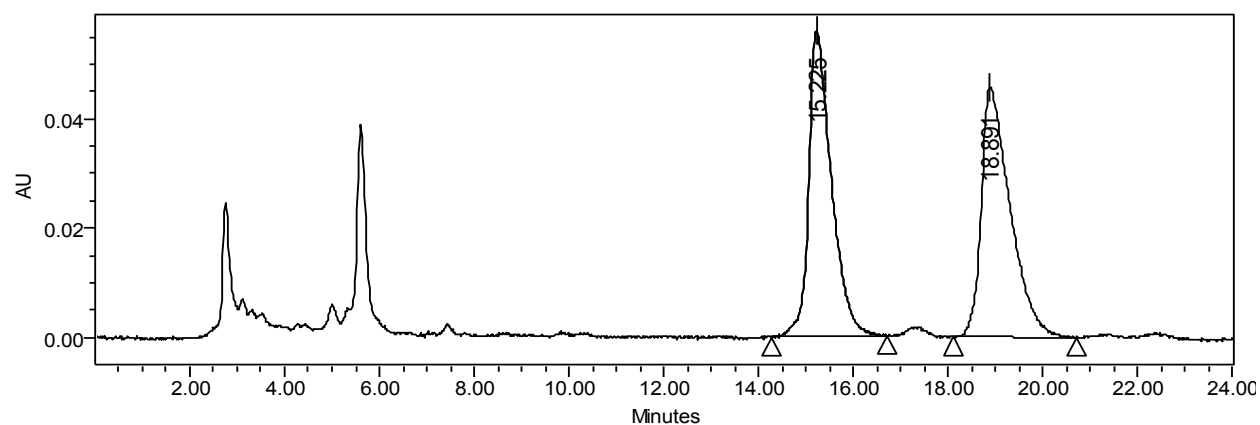

ENT:

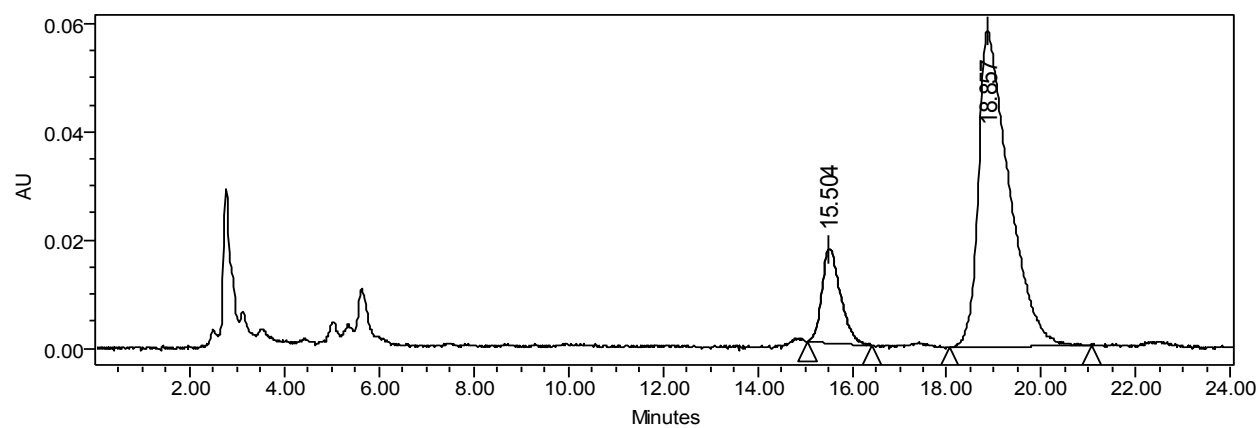

|   | Name | Retention Time | Area    | % Area | Height | Int Type |
|---|------|----------------|---------|--------|--------|----------|
| 2 |      | 18.857         | 2630209 | 84.59  | 58453  | bb       |
| 1 |      | 15.504         | 479232  | 15.41  | 17316  | bb       |

(7b) Whelk-O1, 20% IPA / hexanes, 1.2 mL/min. obs: 210 nm.

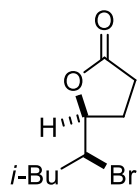

RAC:

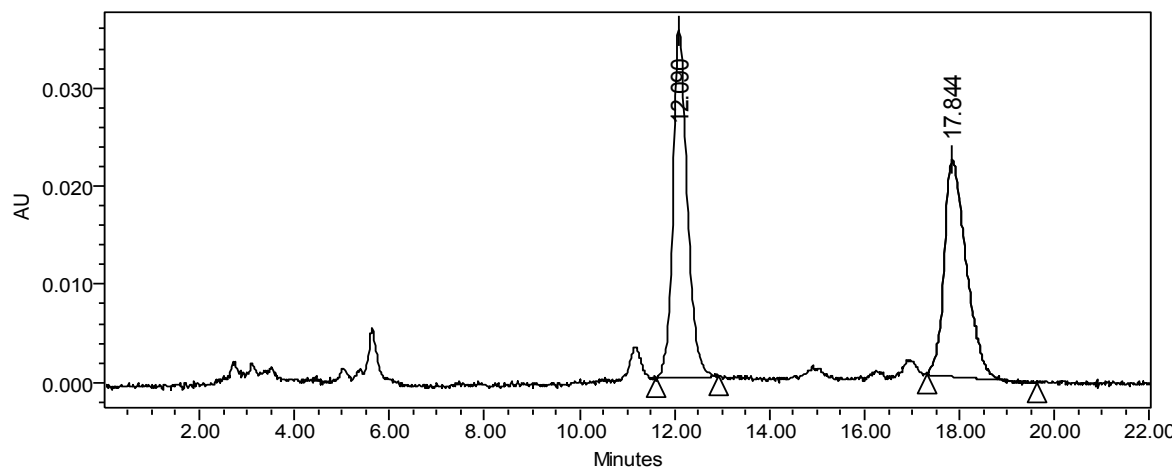

ENT:

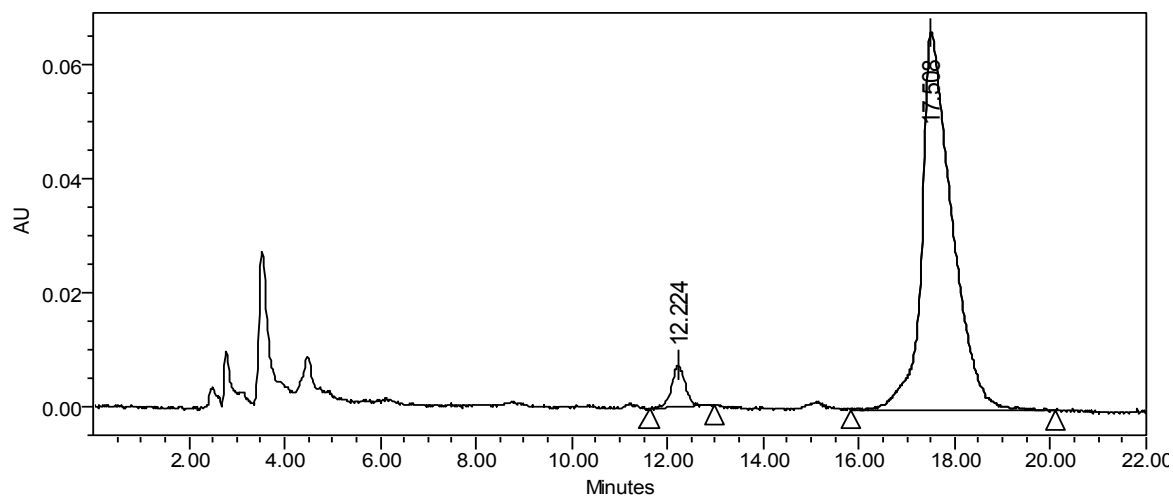

|   | Name | Retention Time | Area    | % Area | Height | Int Type |
|---|------|----------------|---------|--------|--------|----------|
| 1 |      | 12.224         | 144669  | 4.75   | 7408   | bb       |
| 2 |      | 17.508         | 2903611 | 95.25  | 66296  | bb       |

(7c) Whelk-O1, 20% IPA / hexanes, 1.2 mL/min. obs: 210 nm.

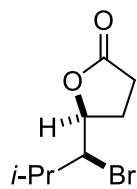

RAC:

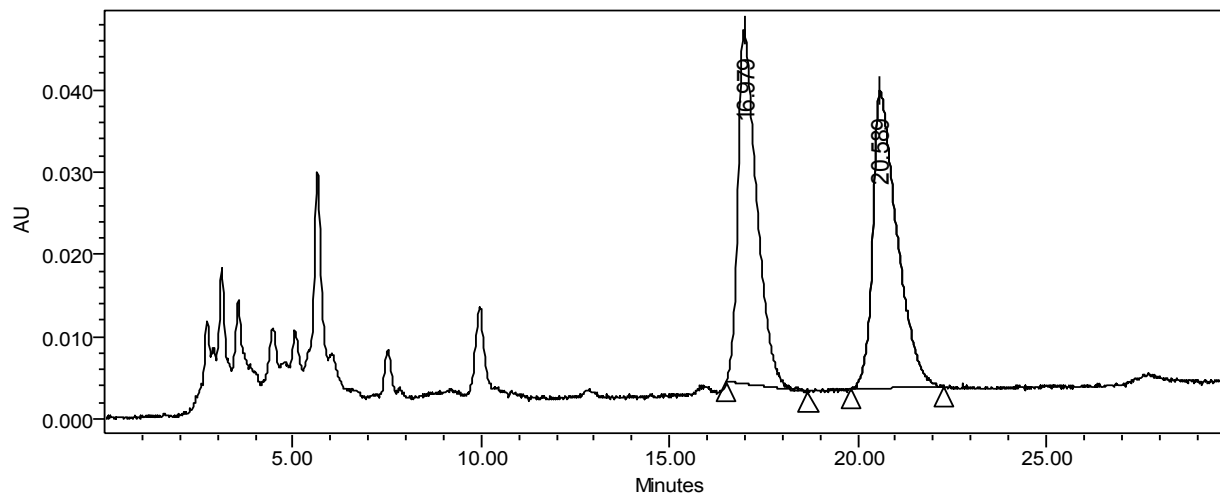

ENT:

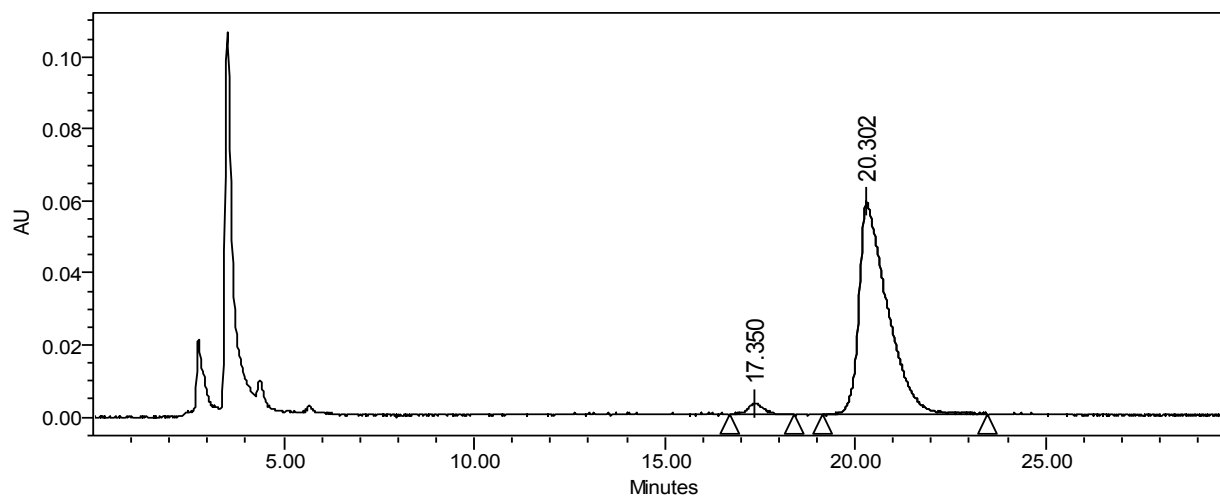

|   | Name | Retention Time | Area    | % Area | Height | Int Type |
|---|------|----------------|---------|--------|--------|----------|
| 2 |      | 20.302         | 3023955 | 97.11  | 58999  | bb       |
| 1 |      | 17.350         | 89957   | 2.89   | 2986   | bb       |

(diastero-7c) OD-H, 0.5% IPA / hexanes, 1.0 mL/min. obs: 210 nm

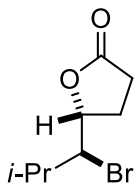

RAC:

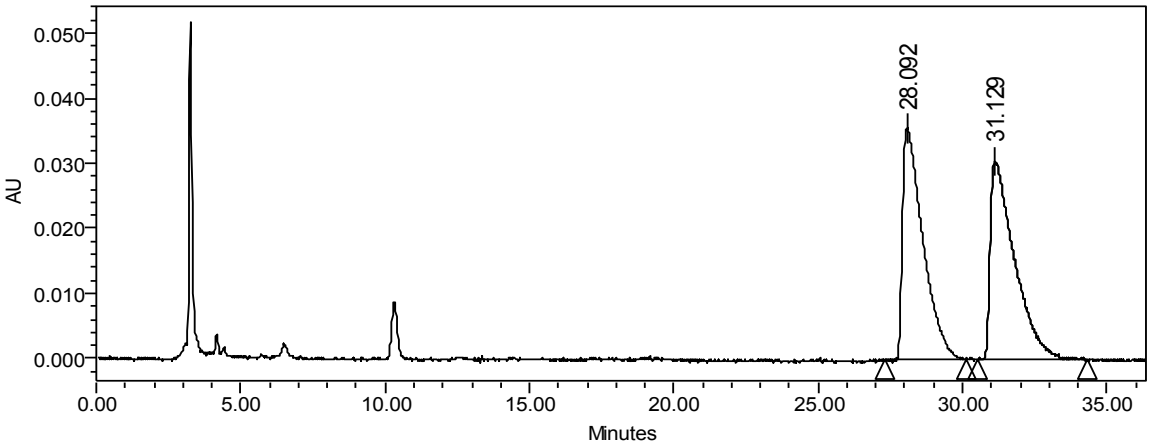

ENT:

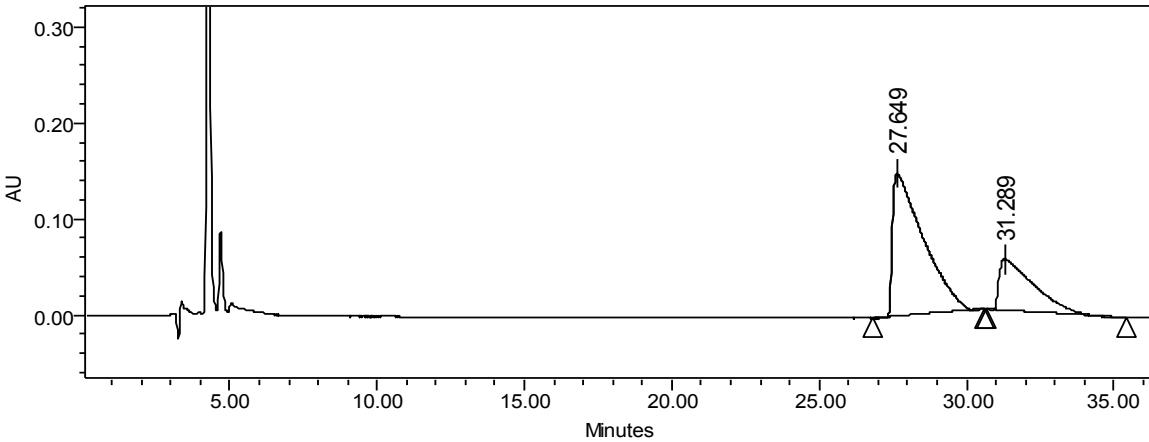

|   | Name | Retention Time | Area     | % Area | Height | Int Type |
|---|------|----------------|----------|--------|--------|----------|
| 1 |      | 27.649         | 10784723 | 71.47  | 148189 | bb       |
| 2 |      | 31.289         | 4305392  | 28.53  | 52596  | bb       |

(7d) Whelk-O1, 20% IPA / hexanes, 1.2 mL/min. obs: 210 nm.

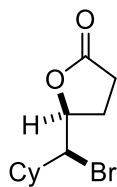

RAC:

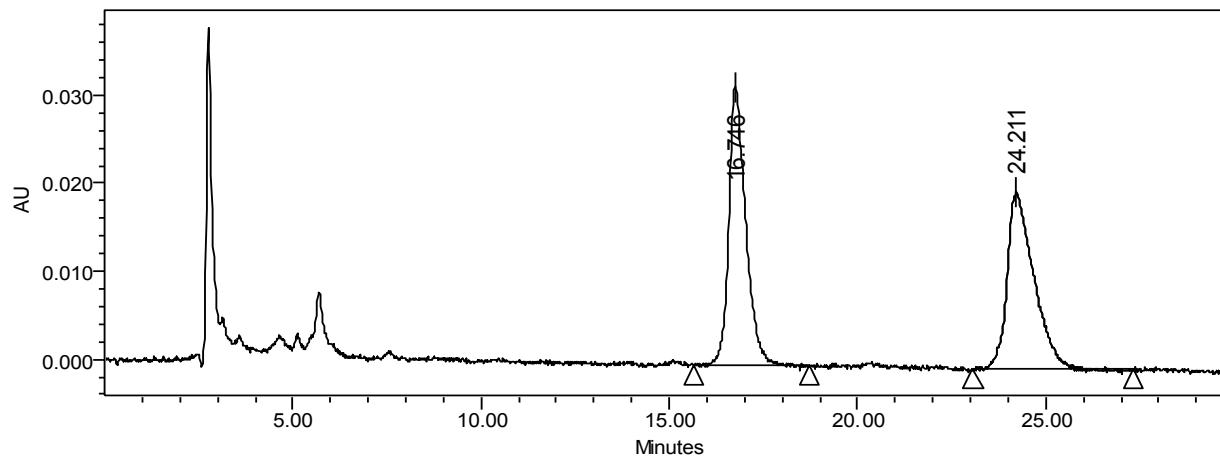

ENT:

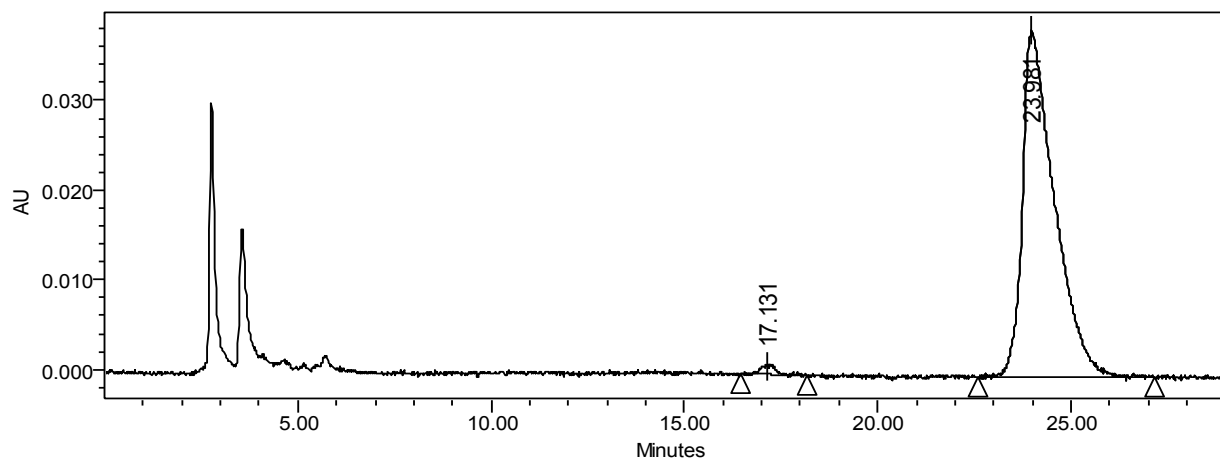

|   | Name | Retention Time | Area    | % Area | Height | Int Type |
|---|------|----------------|---------|--------|--------|----------|
| 2 |      | 23.981         | 2222565 | 98.55  | 38610  | bb       |
| 1 |      | 17.131         | 32637   | 1.45   | 1032   | bb       |

(7e) Whelk-O1, 20% IPA / hexanes, 1.2 mL/min. obs: 210 nm.

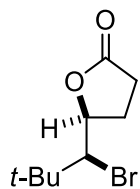

RAC:

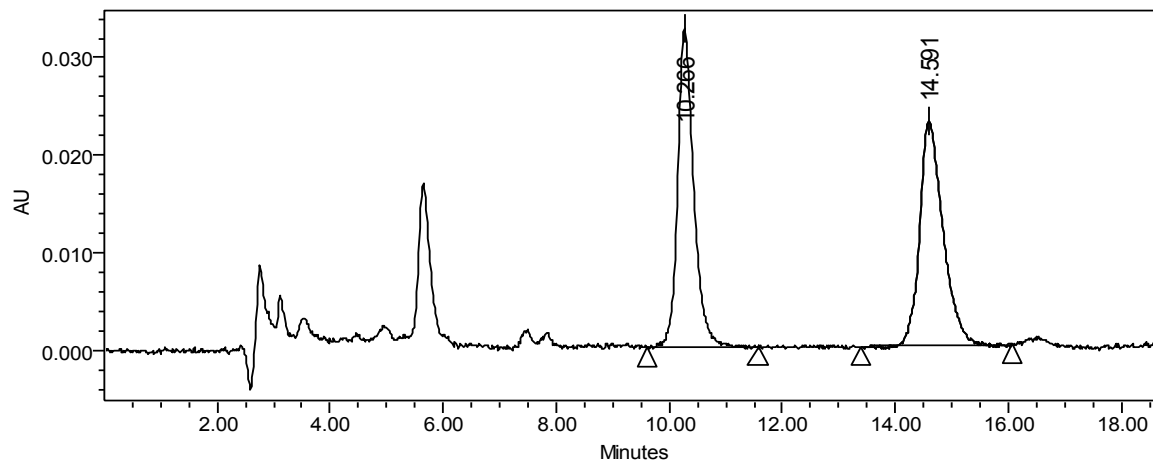

ENT:

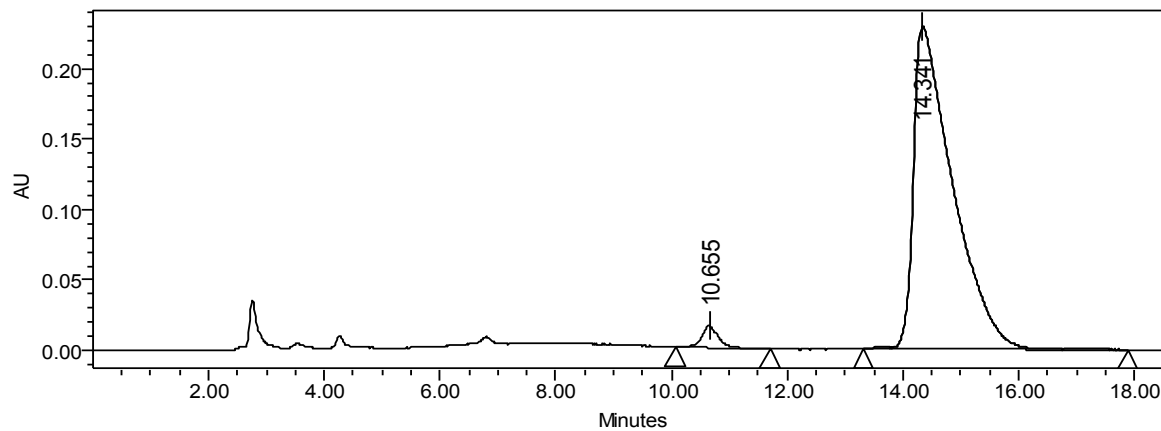

|   | Name | Retention Time | Area     | % Area | Height | Int Type |
|---|------|----------------|----------|--------|--------|----------|
| 2 |      | 14.341         | 10731039 | 97.14  | 228971 | bb       |
| 1 |      | 10.655         | 315510   | 2.86   | 15609  | bb       |

(8f) Whelk-O1, 3% AN / 20% IPA / hexanes, 1.2 mL/min. obs: 210 nm.

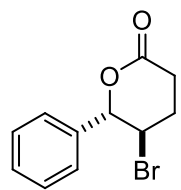

RAC:

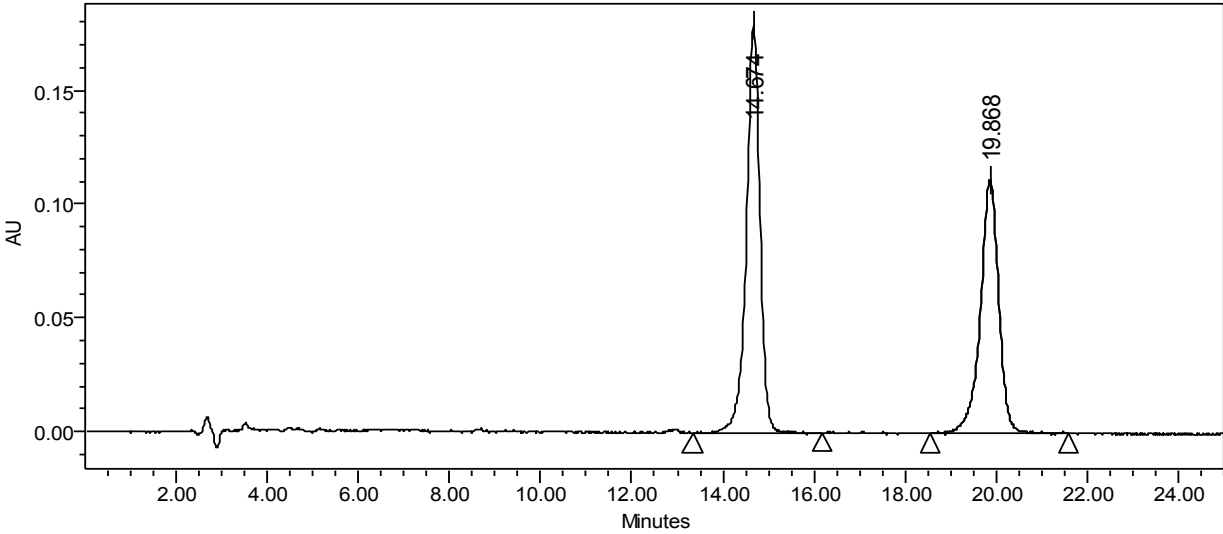

ENT:

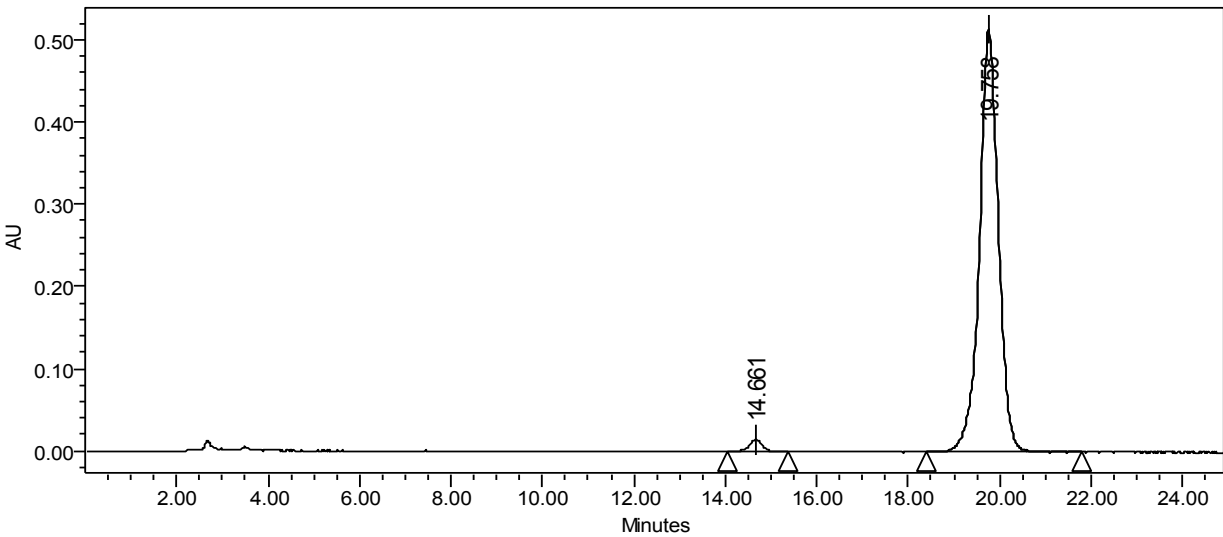

|   | Name | Retention Time | Area     | % Area | Height | Int Type |
|---|------|----------------|----------|--------|--------|----------|
| 1 |      | 14.661         | 286479   | 1.91   | 14474  | bb       |
| 2 |      | 19.758         | 14728036 | 98.09  | 514521 | bb       |

(8g) Whelk-O1, 6% AN / 20% IPA / hexanes, 1.2 mL/min. obs: 225 nm.

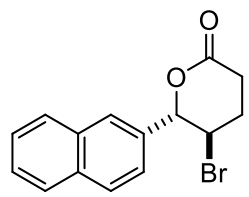

RAC:

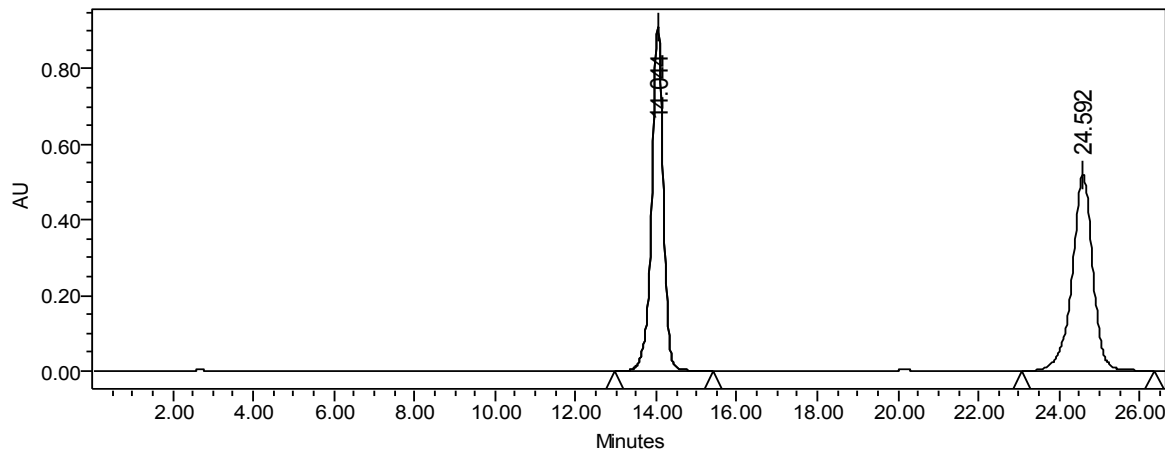

ENT:

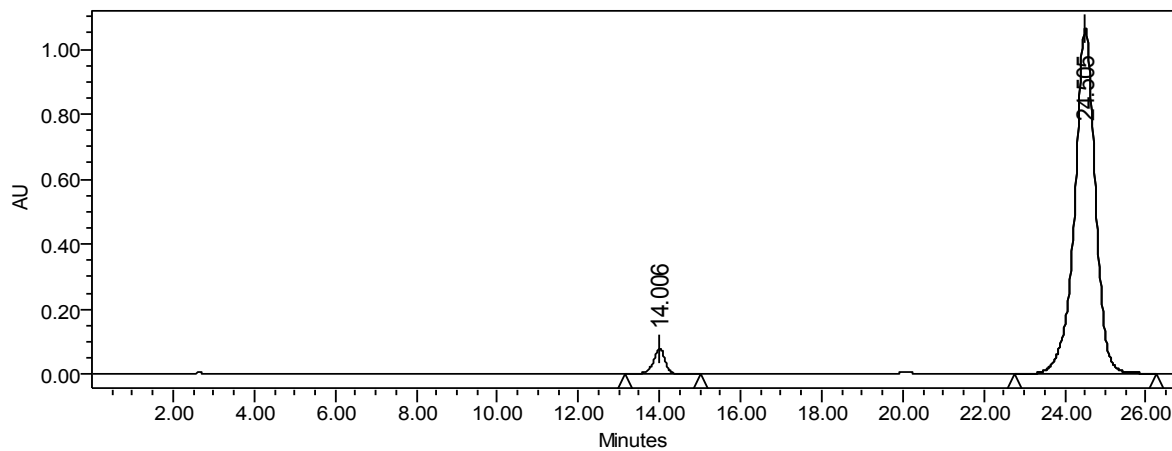

|   | Name | Retention Time | Area     | % Area | Height  | Int Type |
|---|------|----------------|----------|--------|---------|----------|
| 2 |      | 24.505         | 37745743 | 96.00  | 1063542 | bb       |
| 1 |      | 14.006         | 1572523  | 4.00   | 78870   | bb       |

(8h) Whelk-O1, 3% AN / 20% IPA / hexanes, 1.2 mL/min. obs: 233 nm.

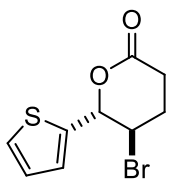

RAC:

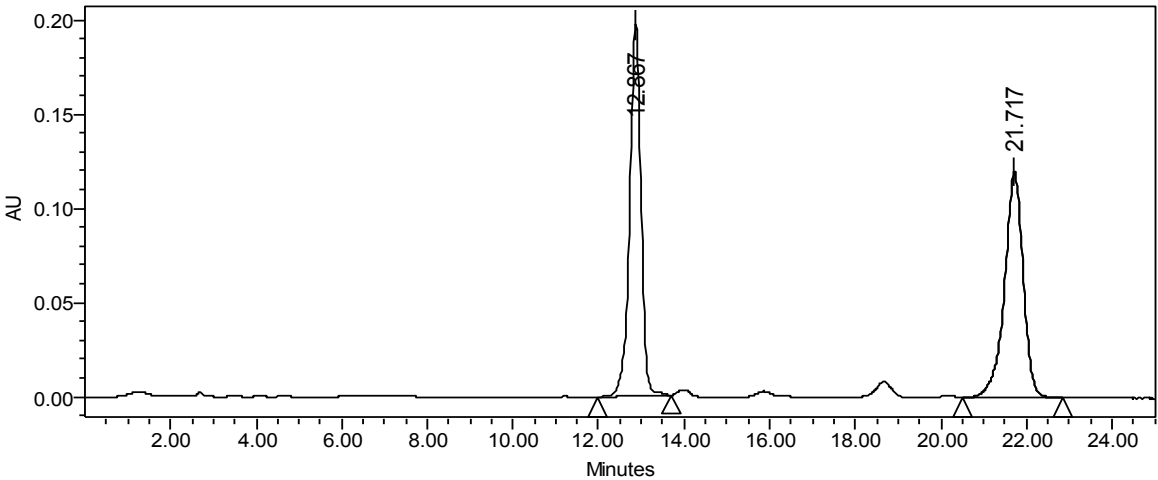

ENT:

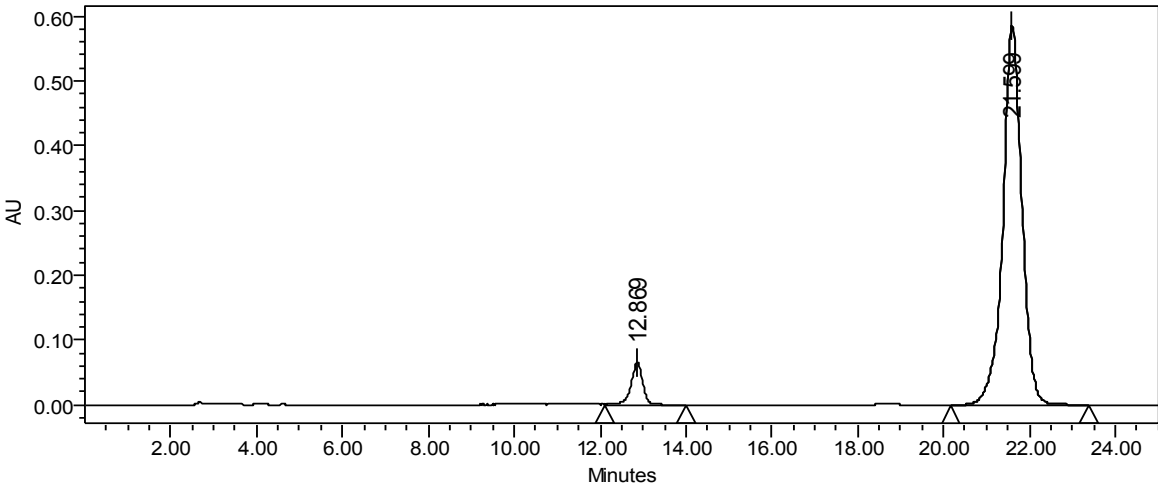

|   | Name | Retention Time | Area     | % Area | Height | Int Type |
|---|------|----------------|----------|--------|--------|----------|
| 2 |      | 21.599         | 18069182 | 93.83  | 586236 | bb       |
| 1 |      | 12.869         | 1188463  | 6.17   | 64640  | bb       |

(10a) Whelk-O1, 20% IPA / hexanes, 1.2 mL/min. obs: 210 nm.

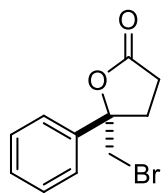

RAC:

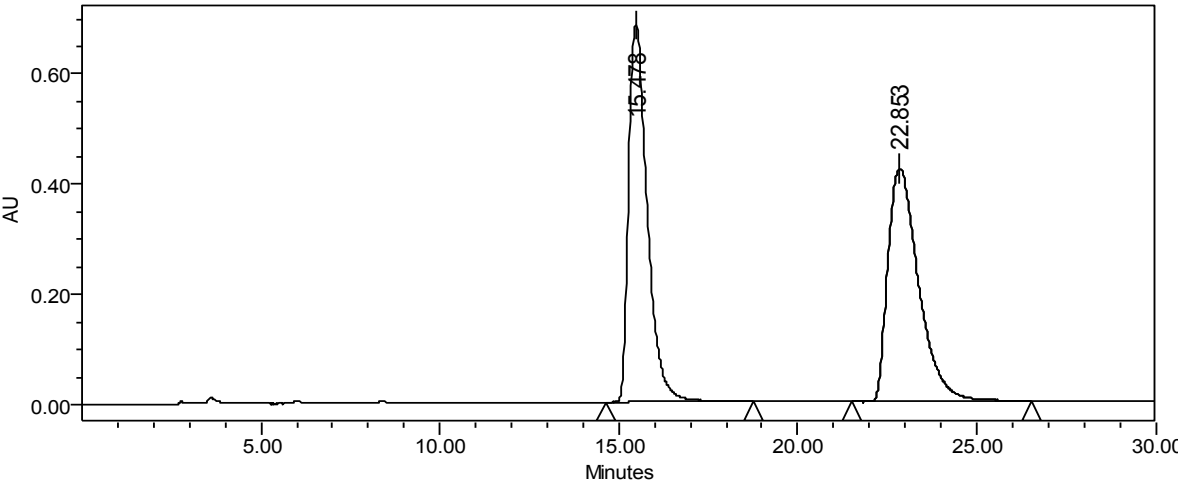

ENT:

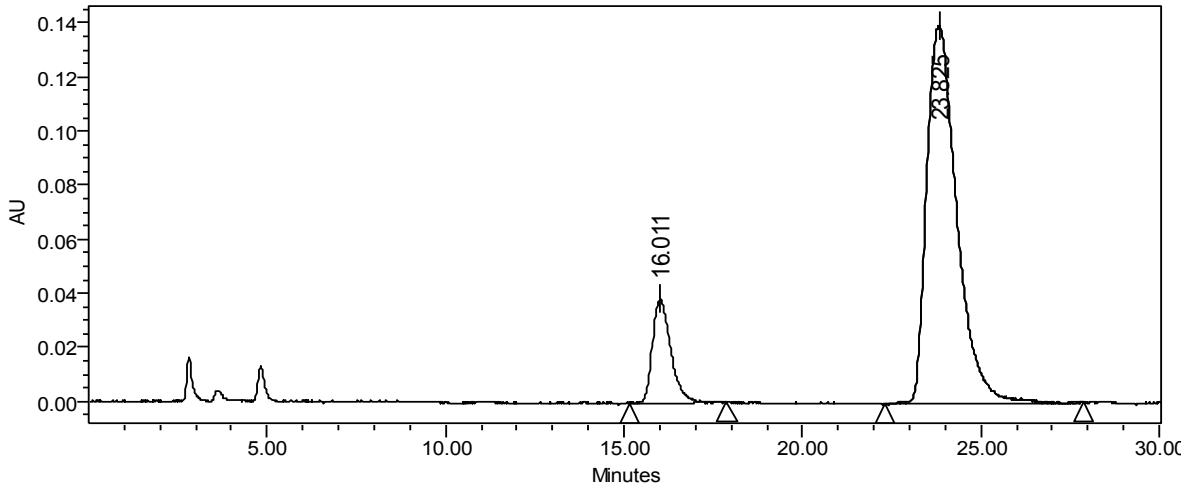

|   | Name | Retention Time | Area    | % Area | Height | Int Type |
|---|------|----------------|---------|--------|--------|----------|
| 2 |      | 23.825         | 8223001 | 85.62  | 139915 | bb       |
| 1 |      | 16.011         | 1381414 | 14.38  | 38540  | bb       |

(10b) Whelk-O1, 6% AN / 20% IPA / hexanes, 1.2 mL/min. obs: 225 nm.

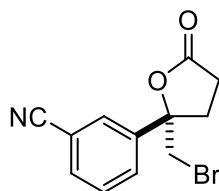

RAC:

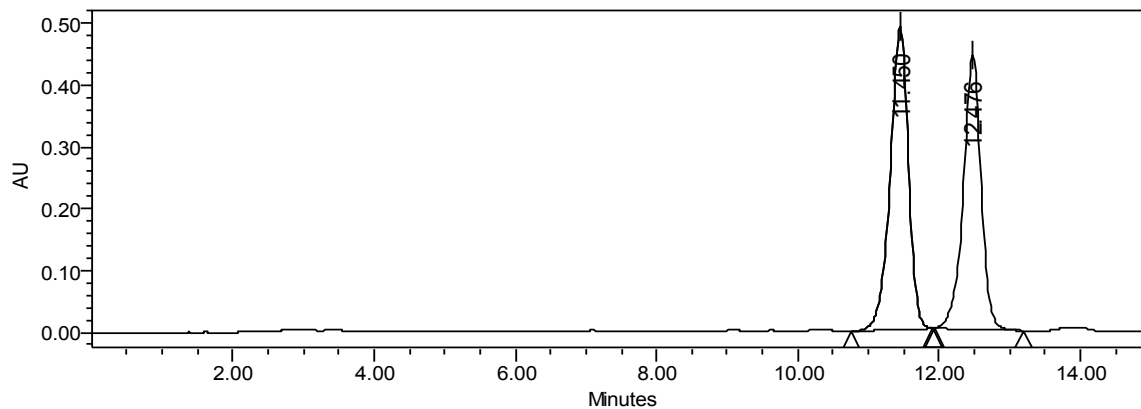

ENT:

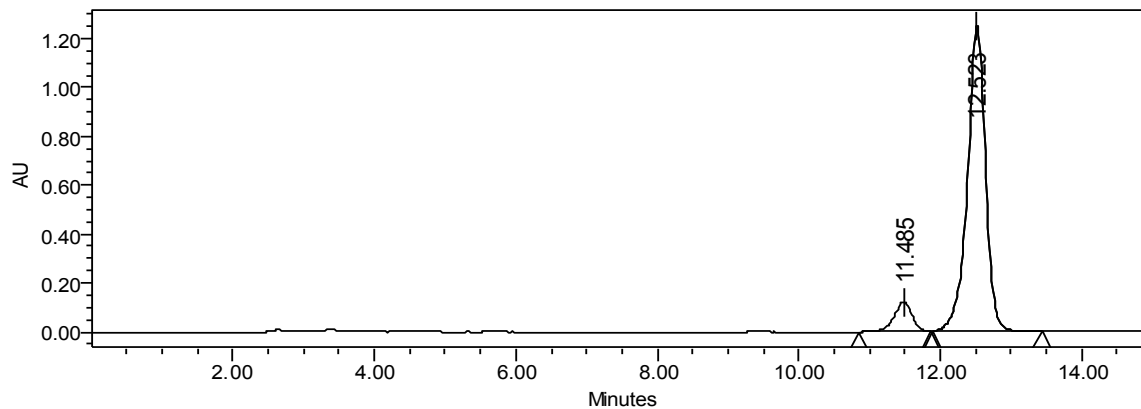

|   | Name | Retention Time | Area     | % Area | Height  | Int Type |
|---|------|----------------|----------|--------|---------|----------|
| 2 |      | 12.523         | 22402229 | 91.42  | 1253425 | bb       |
| 1 |      | 11.485         | 2102403  | 8.58   | 120657  | bb       |

(10c) Whelk-O1, 6% AN / 20% IPA / hexanes, 1.2 mL/min. obs: 230 nm

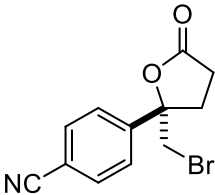

RAC:

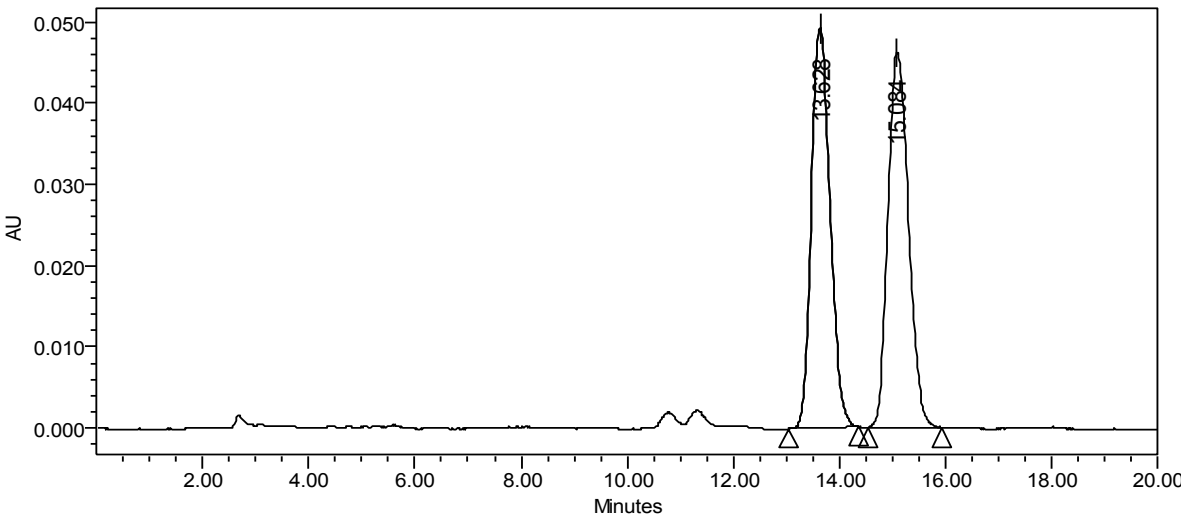

ENT:

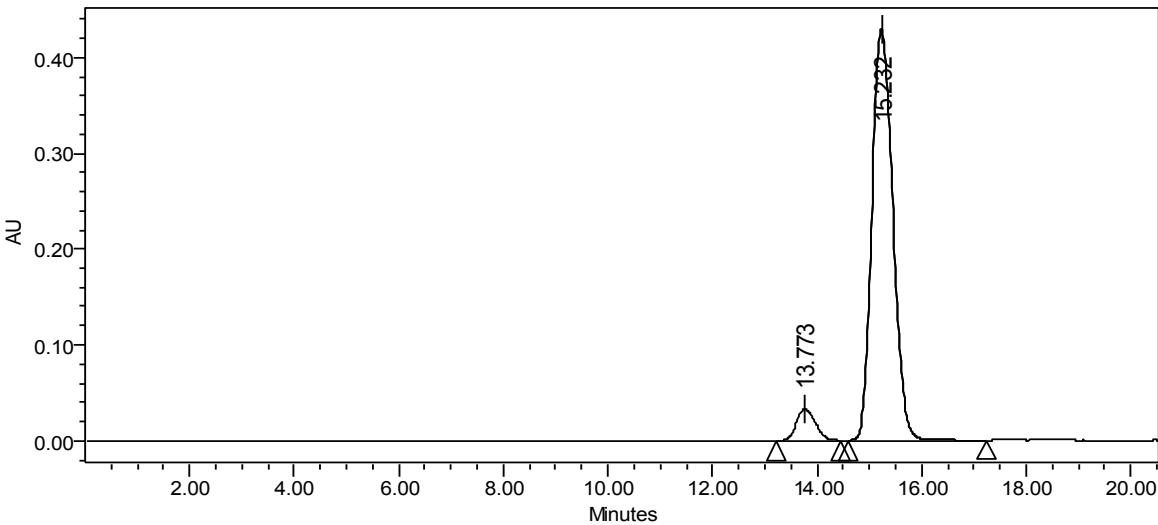

|   | Name | Retention Time | Area     | % Area | Height | Int Type |
|---|------|----------------|----------|--------|--------|----------|
| 2 |      | 15.232         | 11966883 | 93.51  | 430130 | bb       |
| 1 |      | 13.773         | 830374   | 6.49   | 32989  | bb       |

(10d) Whelk-O1, 20% IPA / hexanes, 1.2 mL/min. obs: 210 nm.

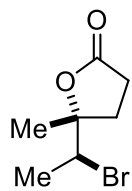

RAC:

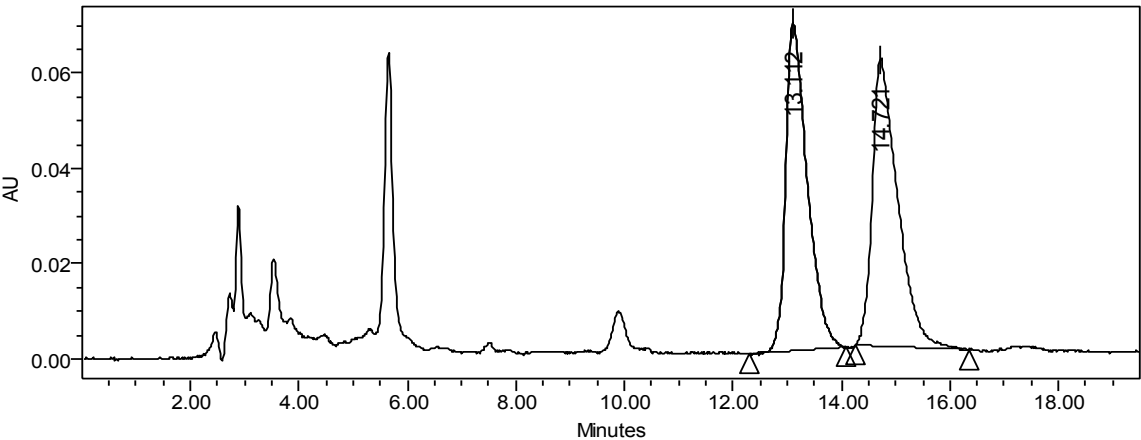

ENT:

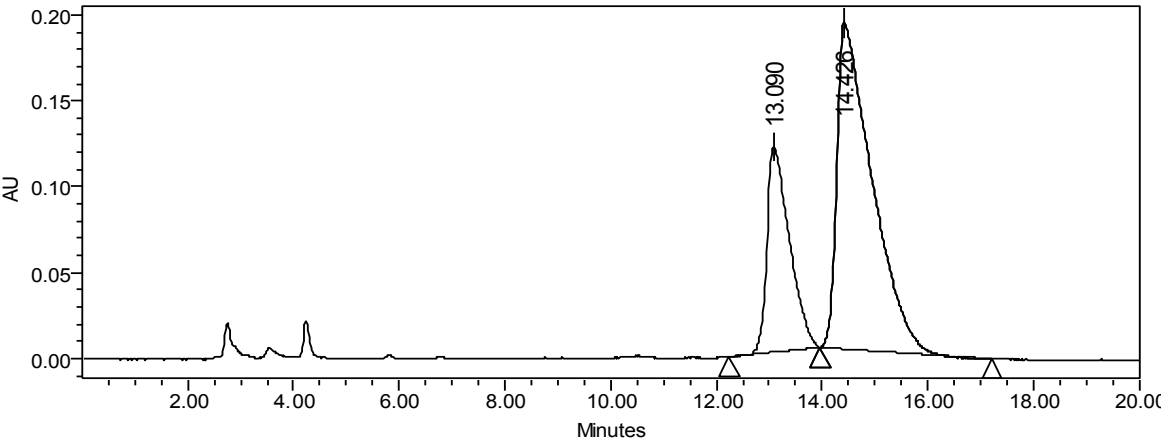

|   | Name | Retention Time | Area    | % Area | Height | Int Type |
|---|------|----------------|---------|--------|--------|----------|
| 2 |      | 14.426         | 8803929 | 71.36  | 189744 | bb       |
| 1 |      | 13.090         | 3534186 | 28.64  | 119508 | bb       |

(11e) Whelk-O1, 20% IPA / hexanes, 1.2 mL/min. obs: 210 nm.

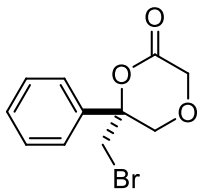

RAC:

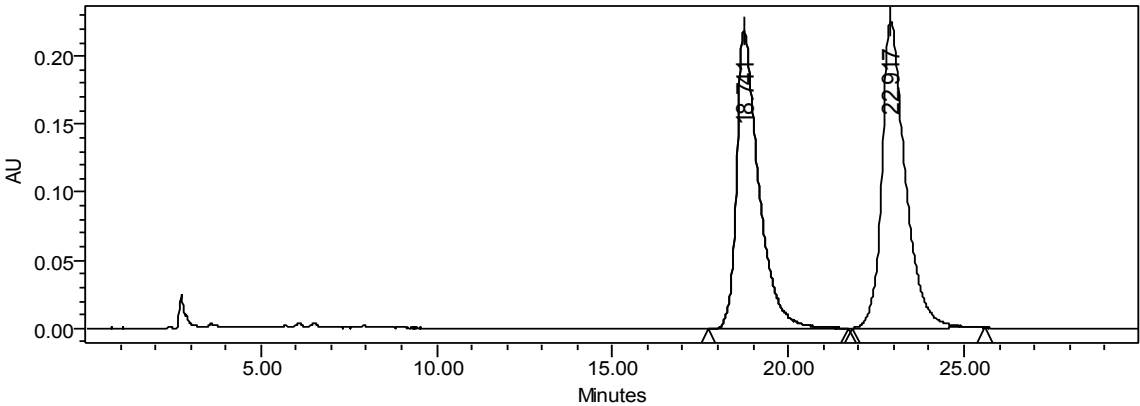

ENT:

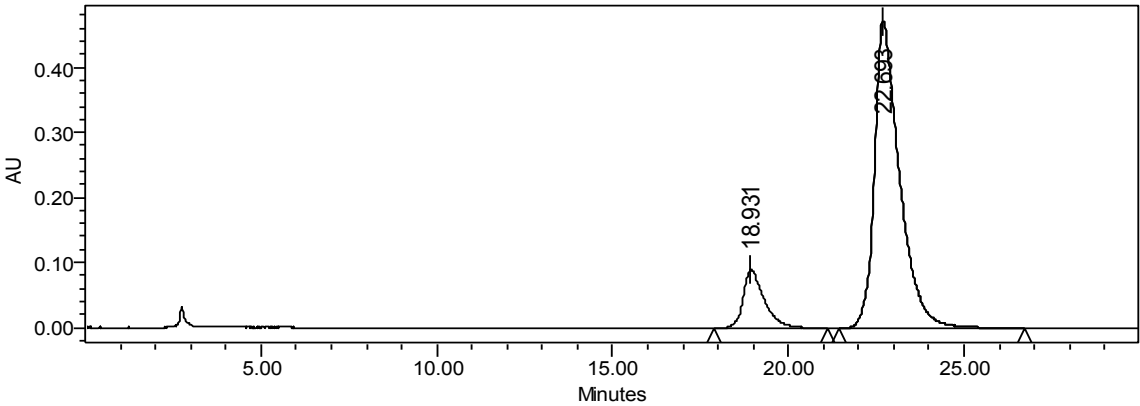

|   | Name | Retention Time | Area     | % Area | Height | Int Type |
|---|------|----------------|----------|--------|--------|----------|
| 2 |      | 22.693         | 23627301 | 86.26  | 472695 | bb       |
| 1 |      | 18.931         | 3764526  | 13.74  | 90507  | bb       |

(11f) Whelk-O1, 20% IPA / hexanes, 1.2 mL/min. obs: 210 nm.

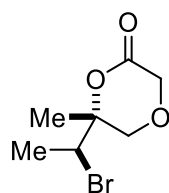

RAC:

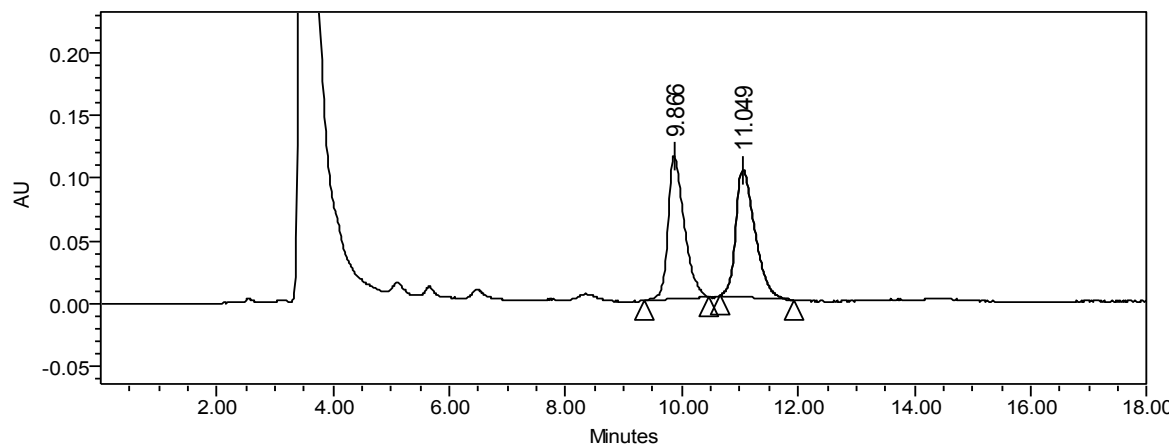

ENT:

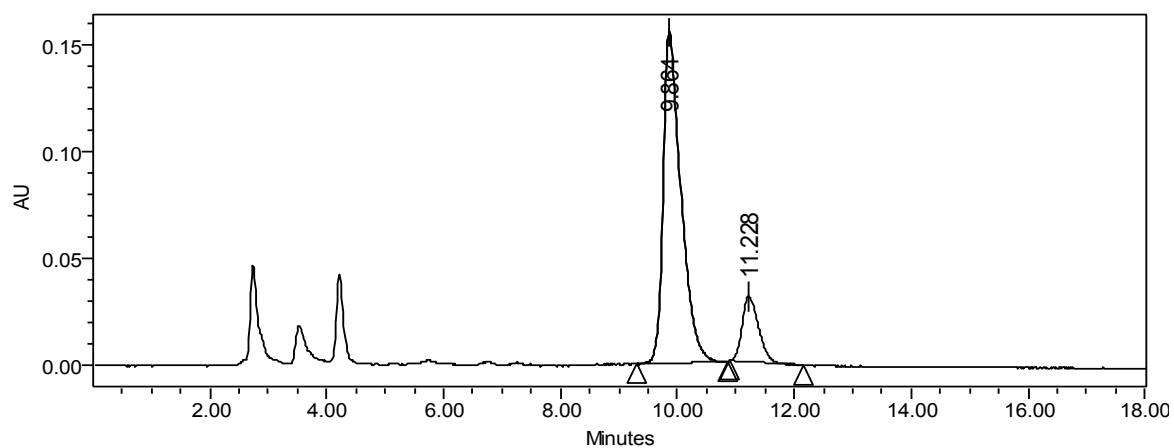

|   | Name | Retention Time | Area    | % Area | Height | Int Type |
|---|------|----------------|---------|--------|--------|----------|
| 1 |      | 9.864          | 3288652 | 84.90  | 155364 | bb       |
| 2 |      | 11.228         | 585085  | 15.10  | 30571  | bb       |

(13) OD-H, 1% IPA / hexanes, 1.0 mL/min. obs: 210 nm

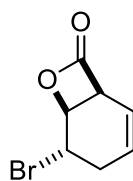

RAC:

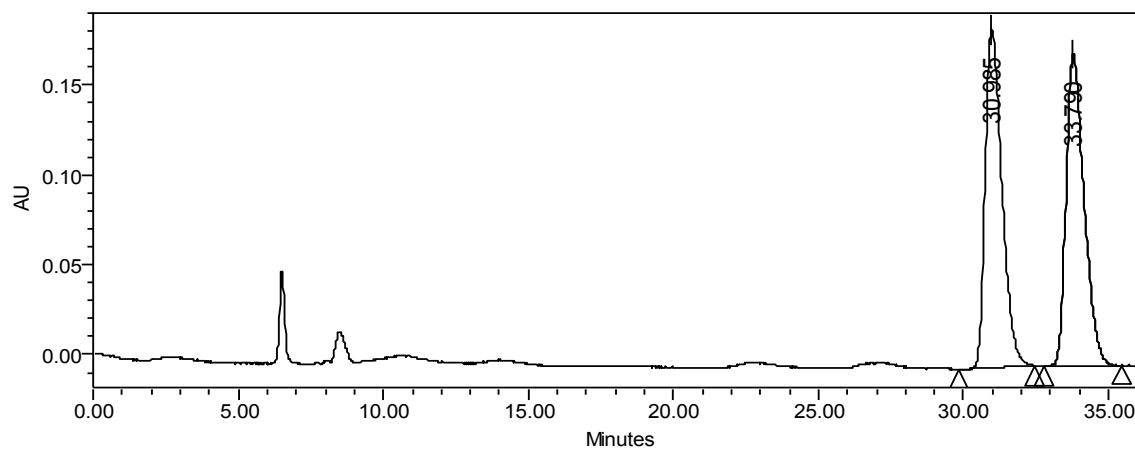

ENT:

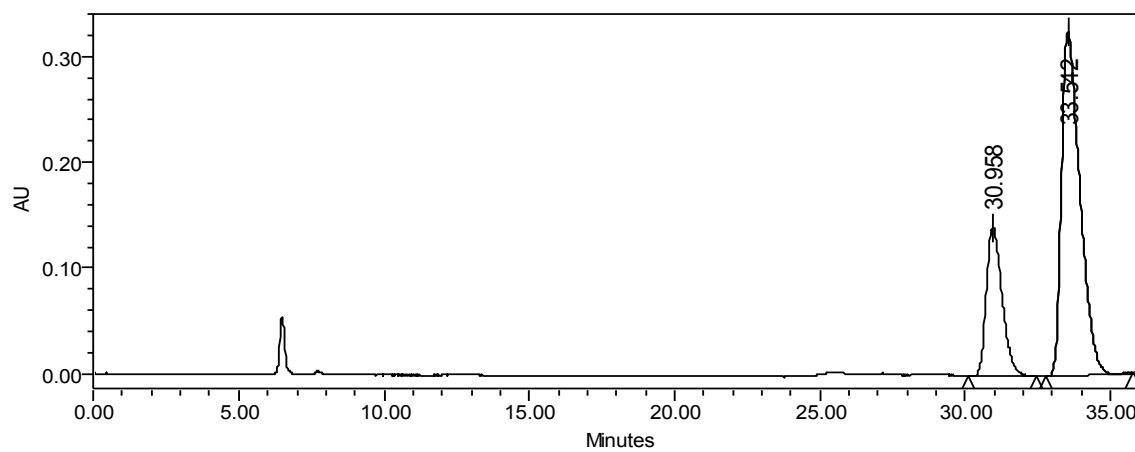

|   | Name | Retention Time | Area     | % Area | Height | Int Type |
|---|------|----------------|----------|--------|--------|----------|
| 2 |      | 33.542         | 14416667 | 73.06  | 326229 | bb       |
| 1 |      | 30.958         | 5317162  | 26.94  | 139889 | bb       |

## <sup>1</sup>H and <sup>13</sup>C NMRs (organized by compound reference number)

```
Archive directory:
Sample directory:

Pulse Sequence: szpu1
Solvent: cdcl3
Ambient temperature
File: 04_DHP_228_tly2_s2pu1_H1
INVOA=500 "mmetroly"

Pulse, delay 2.000 sec
Pulse 30.0 degrees
Acq. time 4.000 sec
Width 6410.3 Hz
8 repetitions
OBSERVE H1 399.8047209 MHz
DATA PROCESSING
FI size 65536
Total time 1 min, 0 sec
```

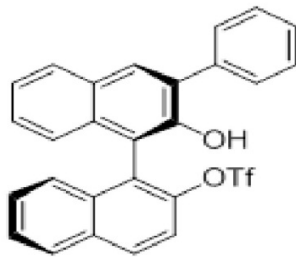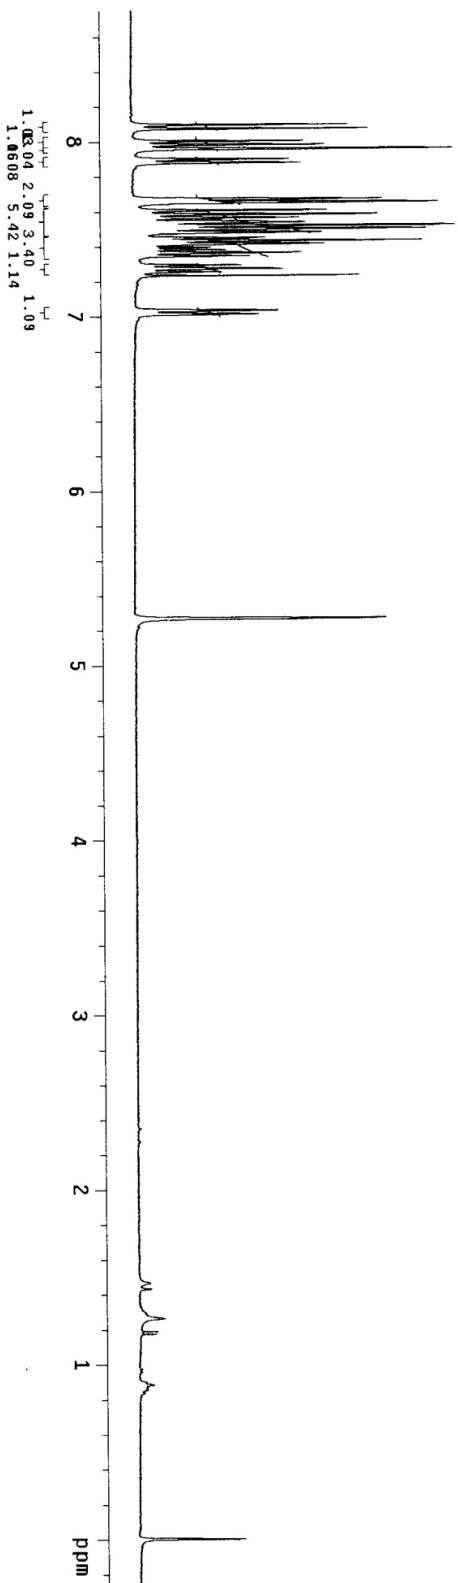

Archive directory:  
Sample directory:

Pulse Sequence: s2pul  
Solvent: cdcl3  
Ambient temperature  
User: 1-14-87  
File: 04.DHP.228.s2pul\_C13  
INOVA-500 "nmrftoy"

Relax. delay 2.000 sec  
Pulse 30.0 degrees  
Acq. time 1.300 sec  
Width 24509.8 Hz  
512 repetitions  
OBSERVE C13, 100.5309747 MHz  
DECOUPLE H1, 399.8067105 MHz  
Power 44 dB  
Continuously on  
WALTZ-16 modulated  
DATA PROCESSING  
FT size 65536  
Total time 28 min, 14 sec

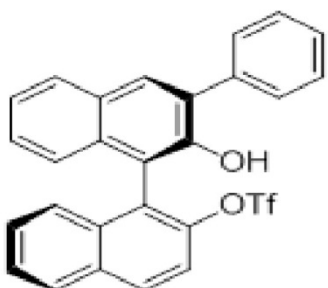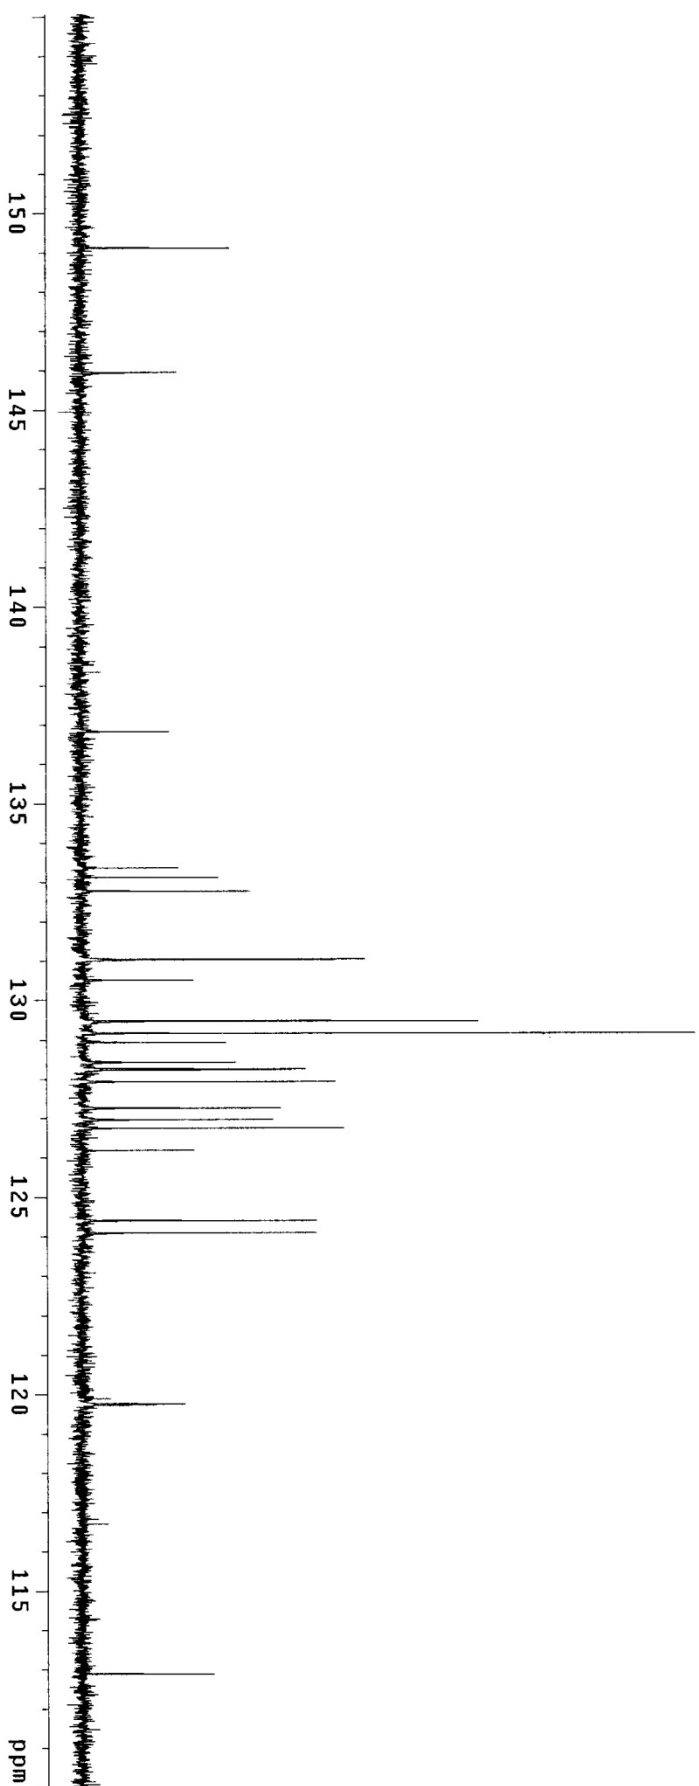

Archive directory:  
Sample directory:

Pulse Sequence: szpul

Solvent: cdcl3  
Ambient temperature  
File: 04\_DHP-230-szpu1\_H1  
INOVA-500 "nmr1roy"

Relax. delay 2.000 sec  
Pulse 30.0 degrees  
Acq. time 4.080 sec  
Width 6410.3 Hz  
8 Repetitions  
OBSERVE H1 399.8047211 MHz  
DATA PROCESSING  
F1 size 65336  
Total time 1 min, 0 sec

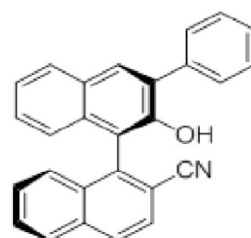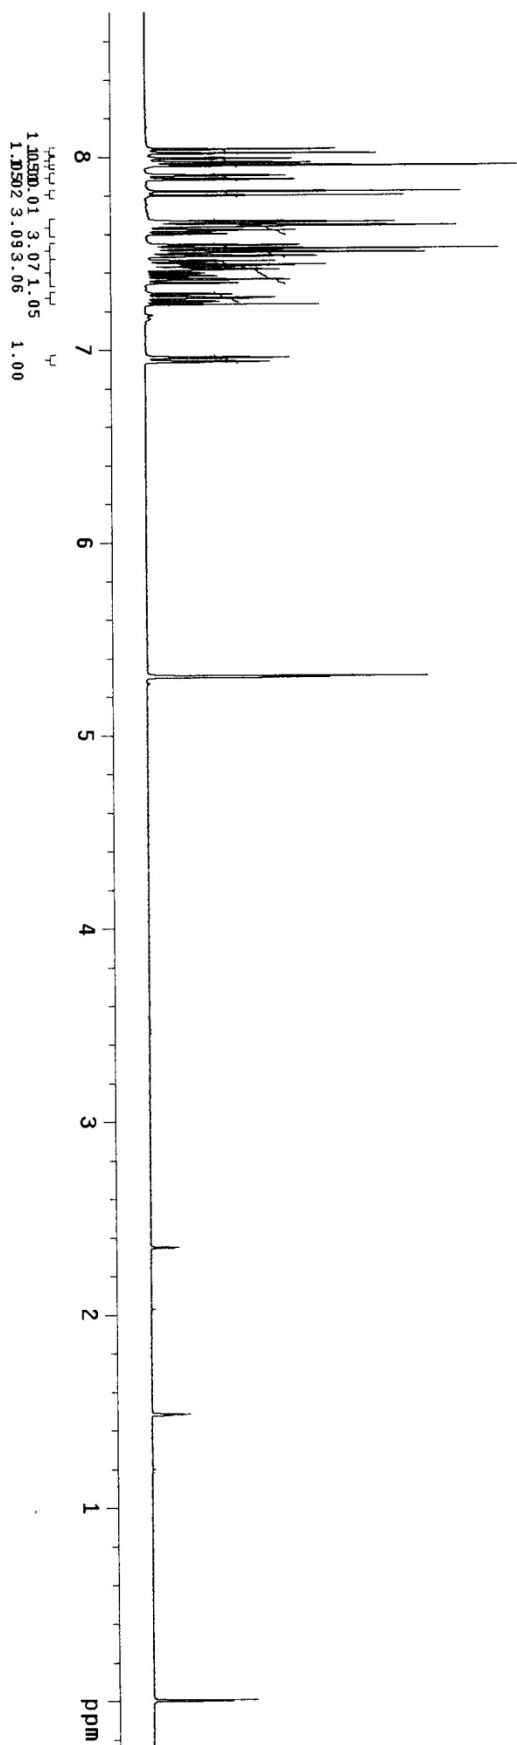

Archive directory:  
Sample directory:  
Pulse Sequence: szpul  
Solvent: cdcl3  
Ambient temperature  
User: 1-14-87  
File: 04.DHP\_230.szpul\_C13  
INOVA-500 "nmr1roy"  
Relax. delay 2.000 sec  
Pulse 30.0 degrees  
Acq. time 1.300 sec  
Width 24509.8 Hz  
512 repetitions  
OBSERVE C13, 100.5309747 MHz  
DECOUPLE H1, 399.8067105 MHz  
Power 44 dB  
continuously on  
WALTZ-16 modulated  
DATA PROCESSING  
FT size 65536  
Total time 28 min, 14 sec

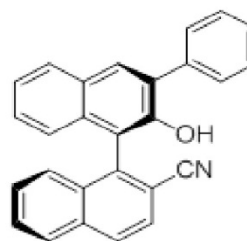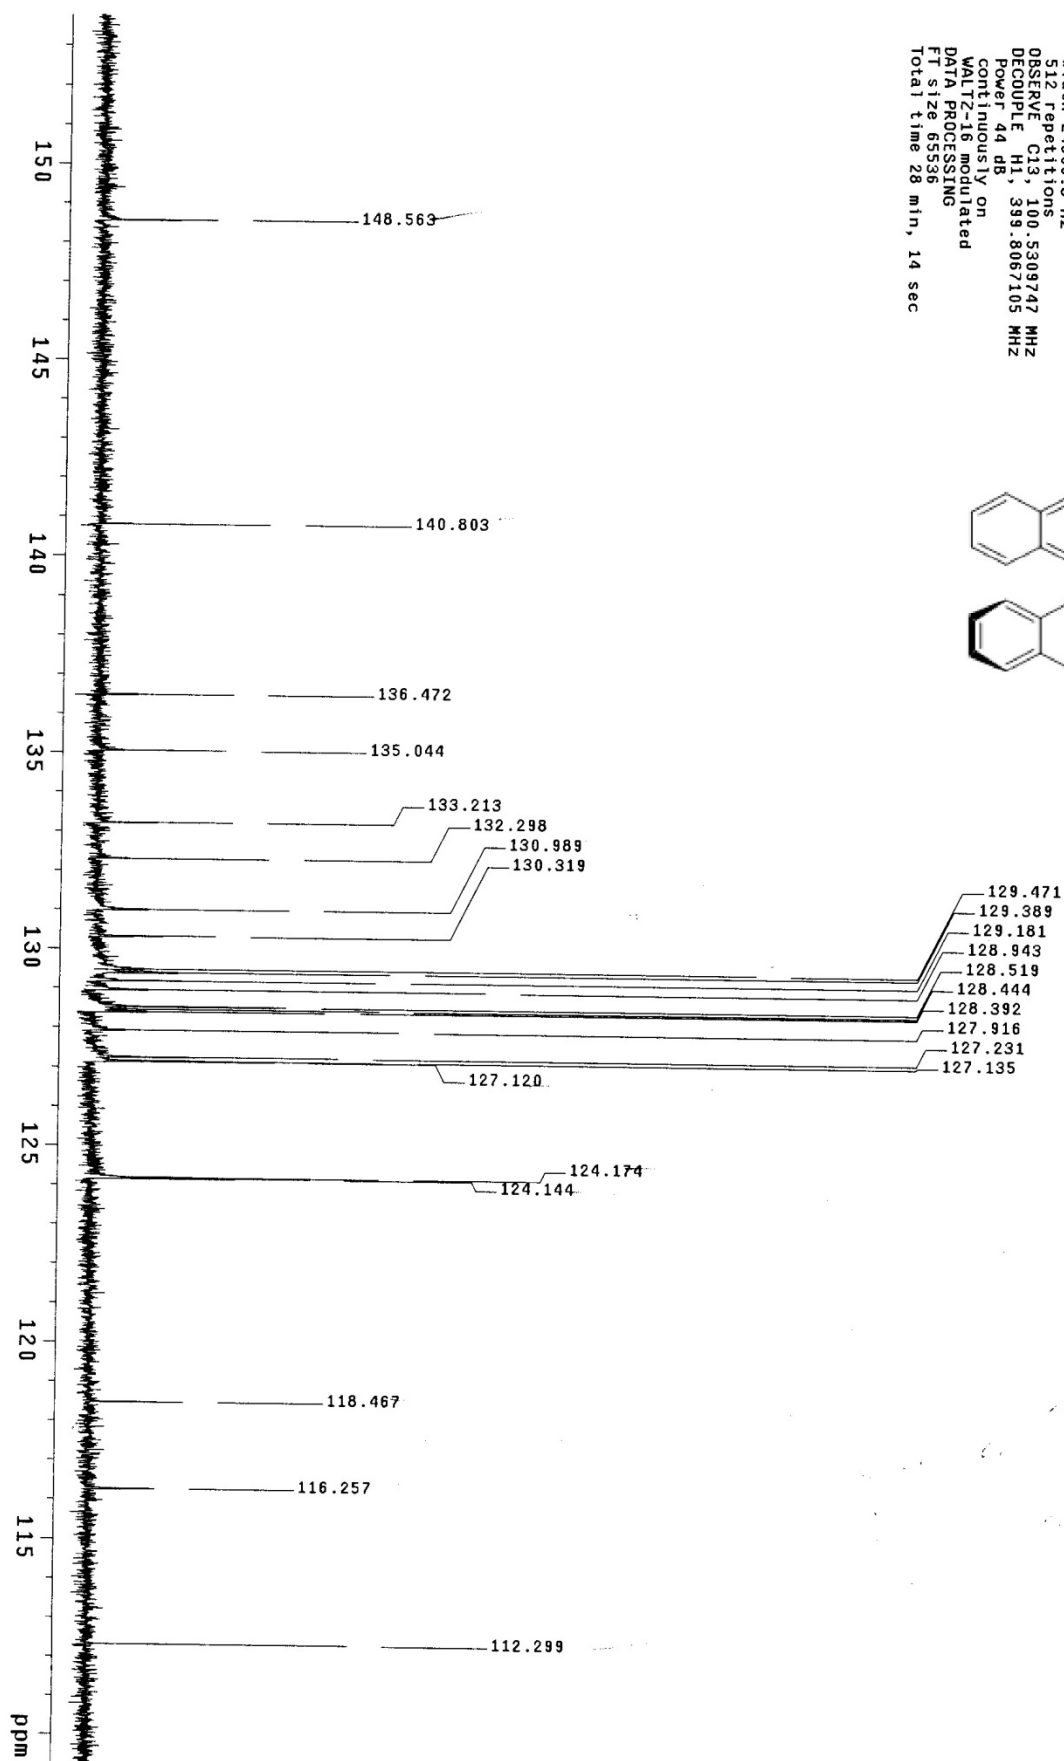

Archive directory:  
Sample directory:

Pulse Sequence: szpu1

Solvent: cdcl3

Ambient temperature

File: 04.DHP\_232\_s2pu1\_H1

INOVA-500 "nmr1roy"

Relax. delay 2.000 sec

Pulse: 30.0 degrees

Acq. time 4.000 sec

Width 6410.3 Hz

8 repetitions

OBSERVE H1, 399.8047309 MHz

DATA PROCESSING

FT size 65536

Total time 1 min, 0 sec

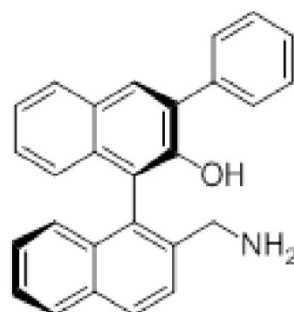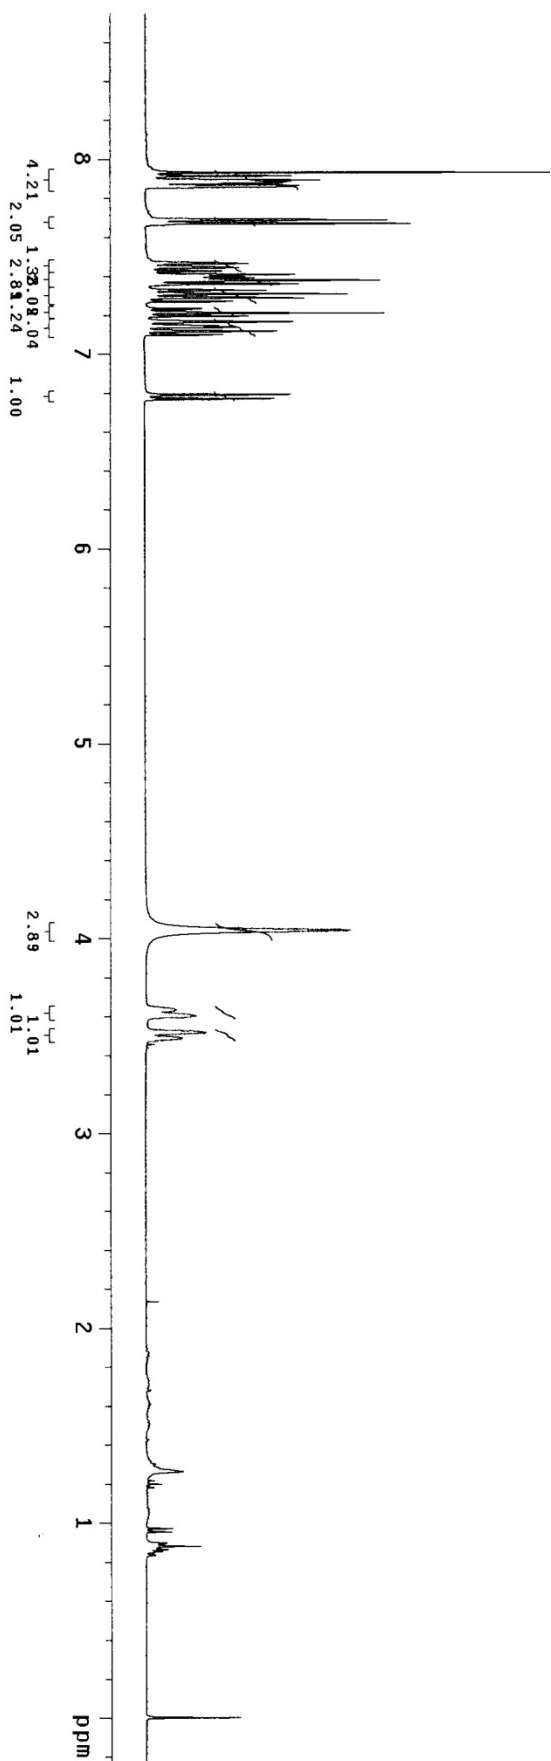

Archive directory:  
Sample directory:

Pulse Sequence: s2pul  
Solvent: cdcl3  
Ambient temperature  
User: 1-14-87  
File: 04 DHP\_232\_s2pul\_C13  
INOVA-500 "nmr1roy" C13

Relax. delay 2.000 sec  
Pulse 30.0 degrees  
Acq. time 1.300 sec  
Width 24509.8 Hz  
512 repetitions  
OBSERVE C13, 100.5309747 MHz  
DECUPLE H1, 399.8067105 MHz  
Power 44 dB  
continuously on  
WALTZ-16 modulated  
DATA PROCESSING  
F1 size 65536  
Total time 28 min, 14 sec

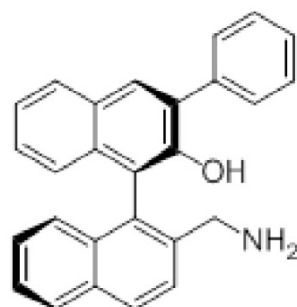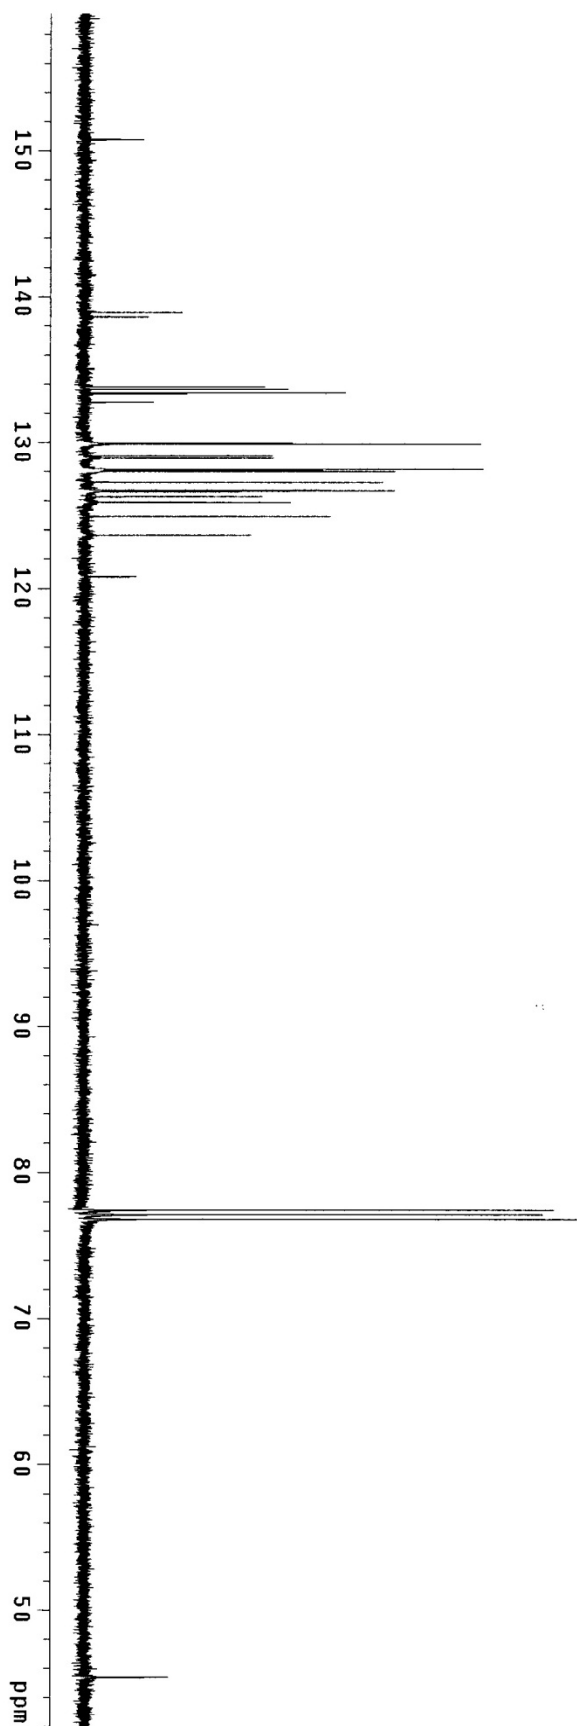

Archive directory:  
Sample directory:

Pulse Sequence: s2pu1

Solvent: cdcl3

Ambient temperature

File: 04.DHP.091.s2pu1\_H1

INOVA-500 "nmretoy"

Relax. delay 2.000 sec

Pulse 30.0 degrees

Acq. time 4.000 sec

Width 6410.3 Hz

8 repetitions

OBSERVE H1, 399.8047246 MHz

DATA PROCESSING

FT size 65536

Total time 1 min, 0 sec

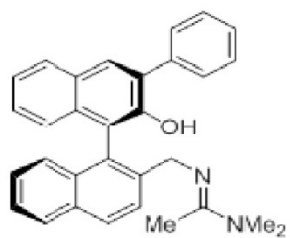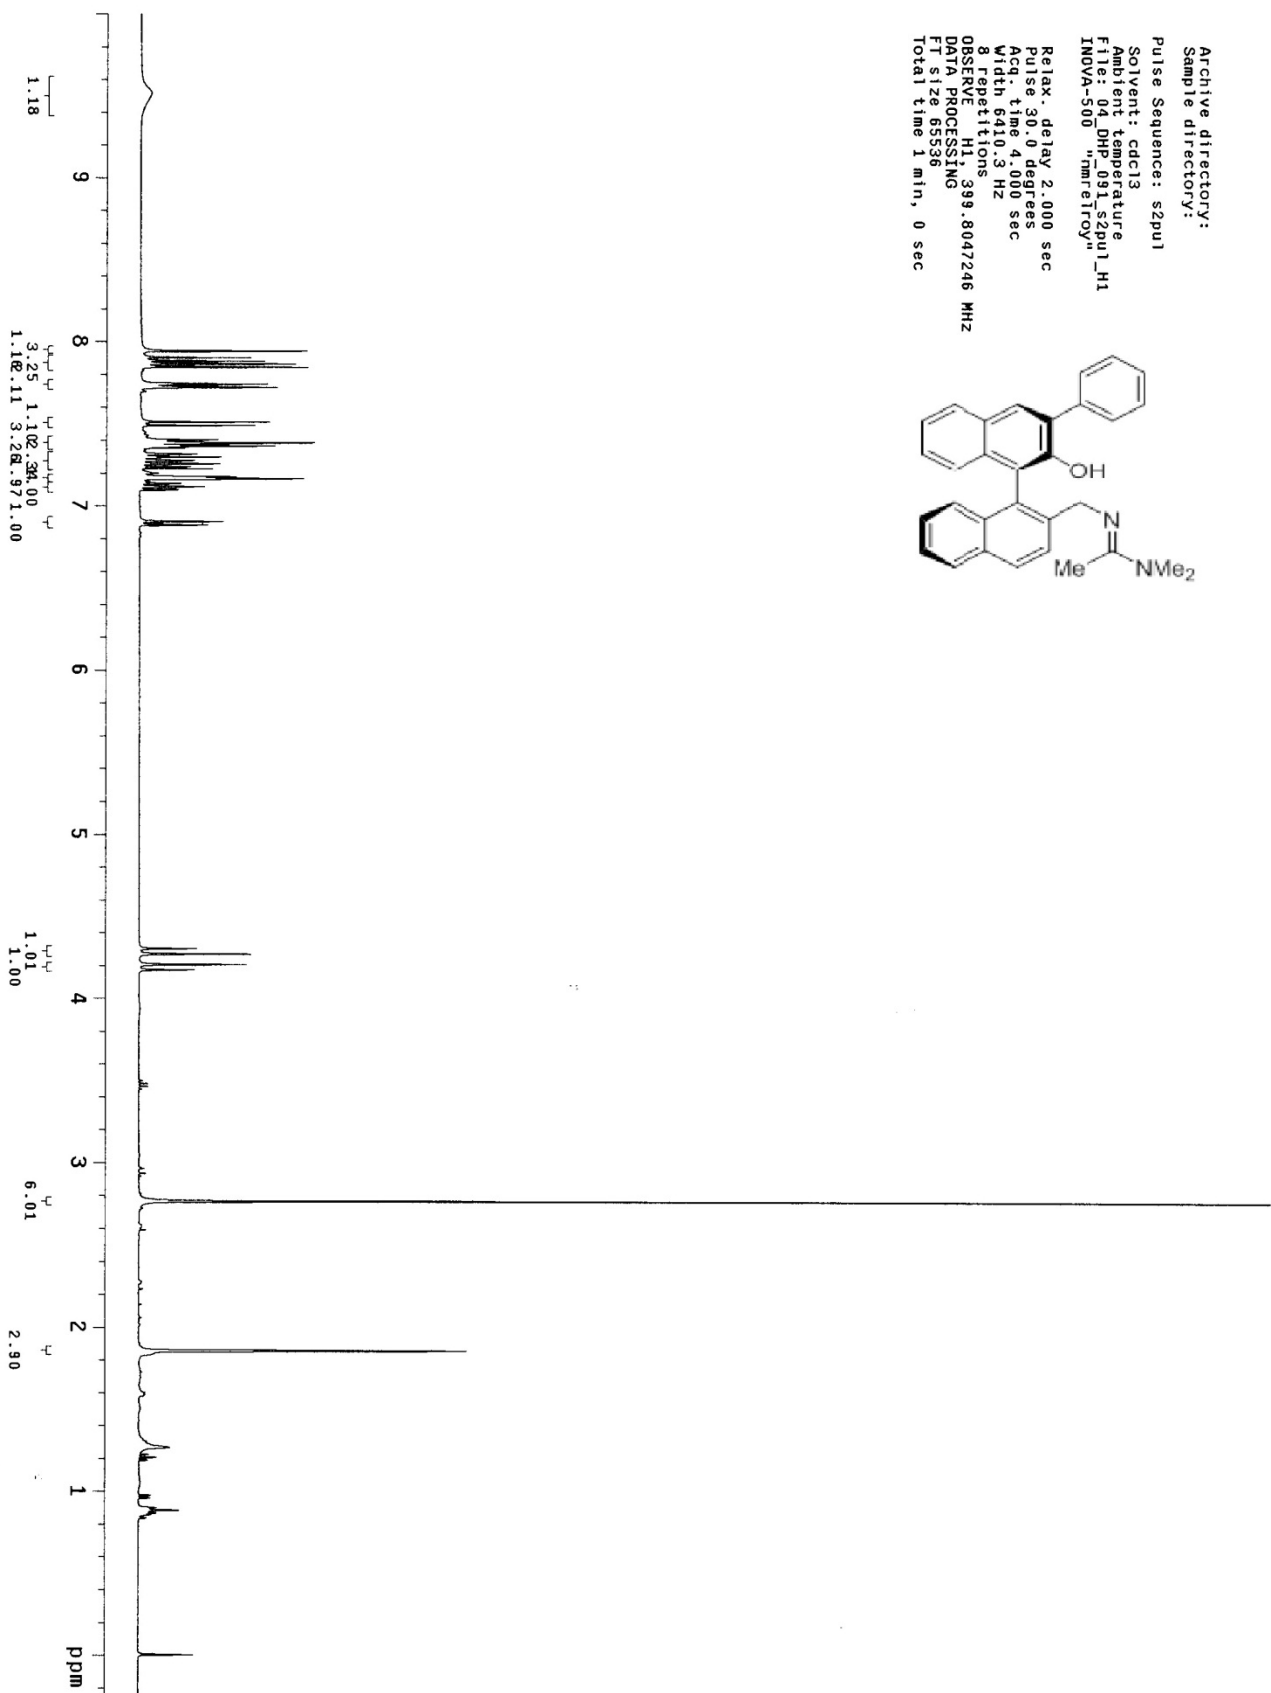

Archive directory:  
Sample directory:

Pulse Sequence: szpu1

Solvent: cdcl3

Ambient temperature

User: 1-14-87

File: 04\_dhp\_091\_s2pu1\_c13

INOVA-500 "nmr1roy"

Relax. delay 2.000 sec

Pulse 30.0 degrees

Acq. time 1.300 sec

Width 24509.8 Hz

512 repetitions

OBSERVE C13, 100.5303747 MHz

DECOUPLE H1, 399.8067105 MHz

Power 44 dB

Continuously on

WALTZ16 simulated

DATA PROCESSING

FT size 65536

Total time 28 min, 14 sec

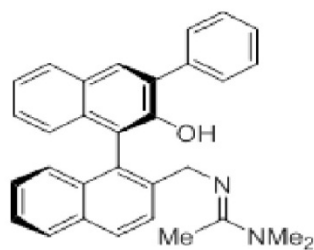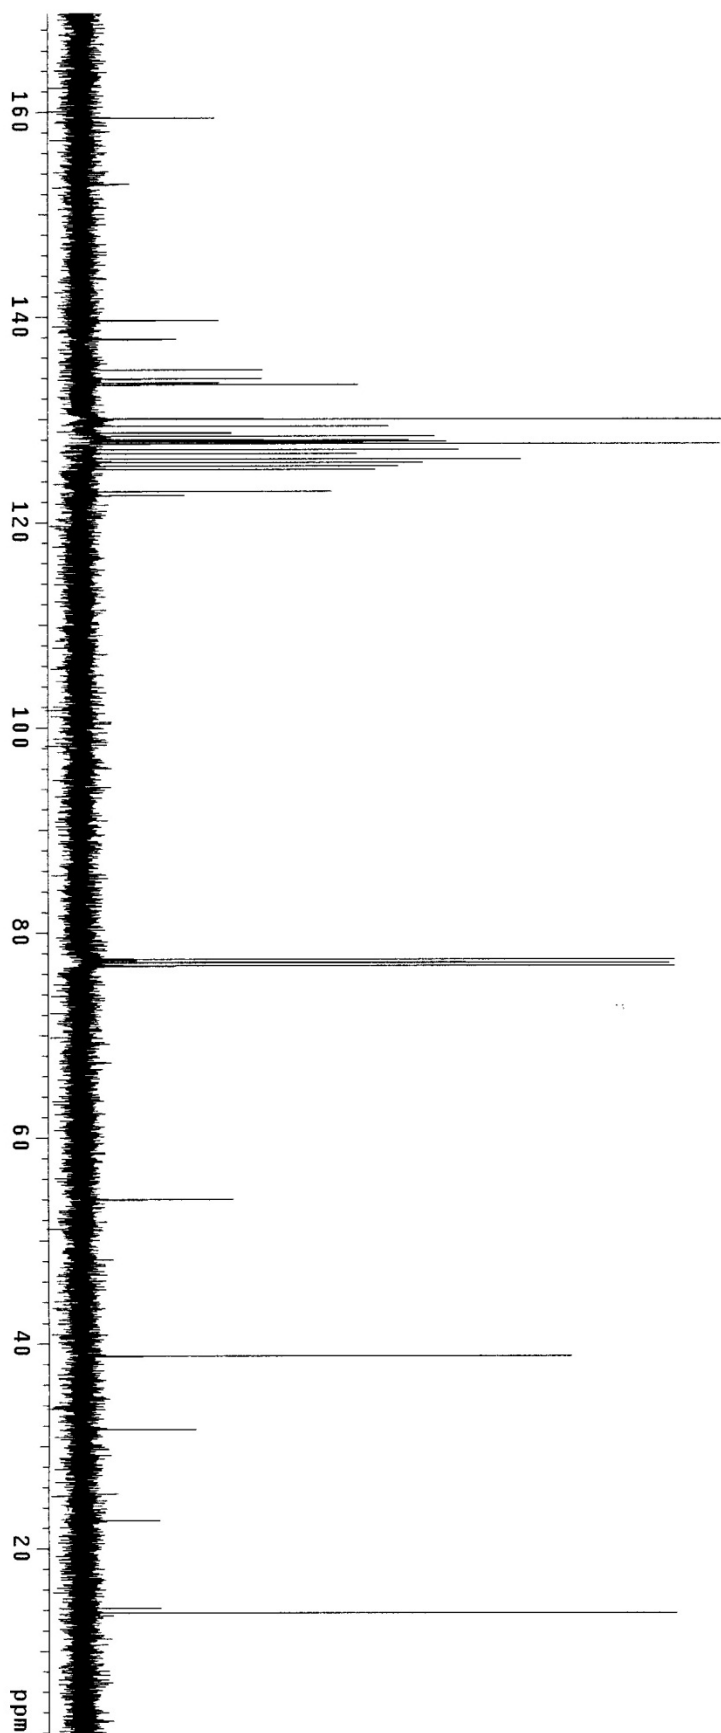

Archive directory:  
Sample directory:

Pulse Sequence: s2pul

Solvent: cdcl3  
Ambient temperature

File: 04\_DHP\_302\_s2pul\_H1  
INOVA-500 "nmr1roy"

Relax. delay 2.000 sec

Pulse 30.0 degrees

Acq. time 4.000 sec

Width 6410.3 Hz

8 repetitions

OBSERVE H1, 399.8047184 MHz

DATA PROCESSING

FT size 65536

Total time 1 min, 0 sec

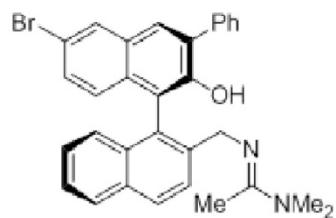

Archive directory:  
Sample directory:

Pulse Sequence: s2pu1  
Solvent: cdcl3  
Ambient temperature  
User: 1-14-87  
File: 04 DHP\_302\_s2pu1\_C13  
INOVA-500 "nmr1roy"

Relax. delay 2.000 sec  
Pulse 30.0 degrees  
Acq. time 1.300 sec  
Width 24509.8 Hz  
512 repetitions  
OBSERVE C13, 100.5309747 MHz  
DECOUPLE H1, 399.8067105 MHz  
Power 44 dB  
continuously on  
WALTZ-16 modulated  
DATA PROCESSING  
FT size 65536  
Total time 28 min, 14 sec

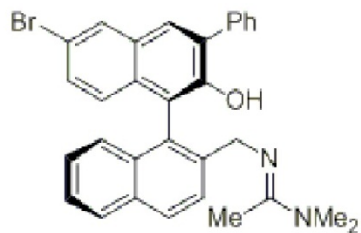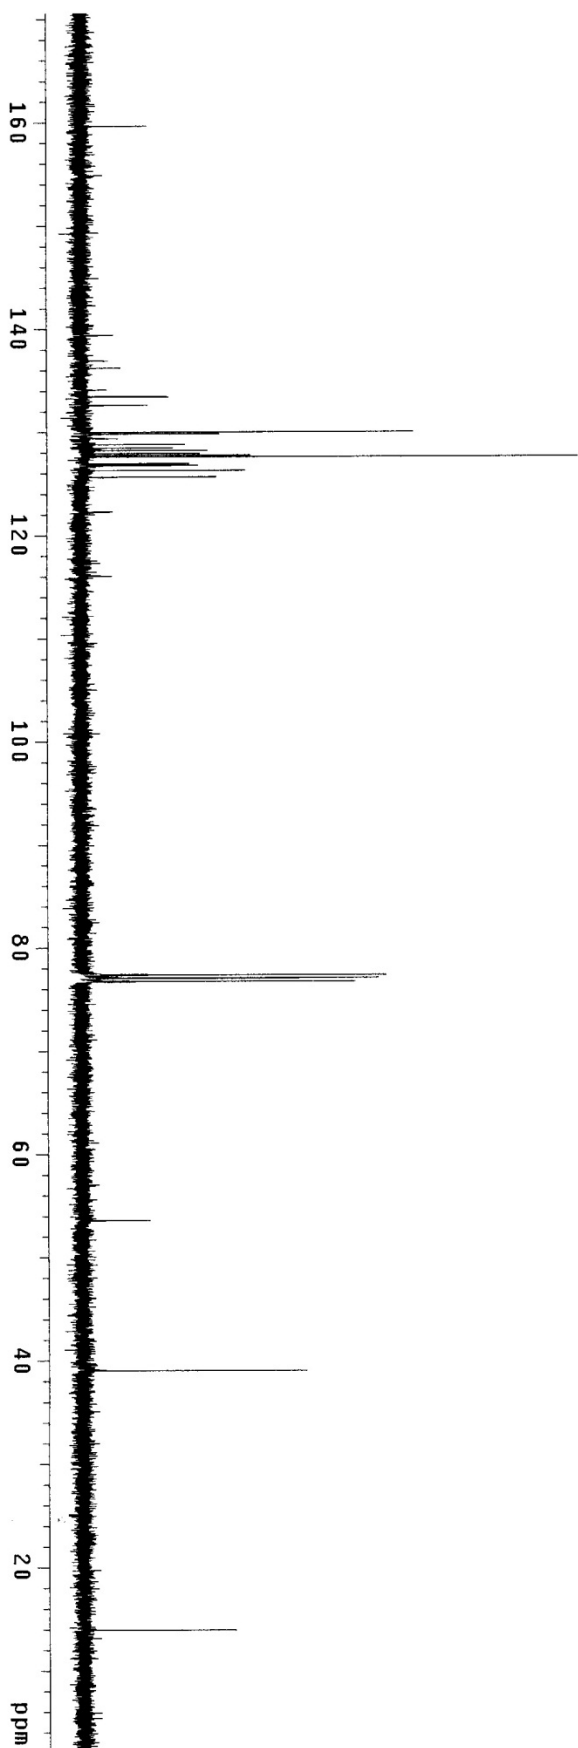

Archive directory:  
Sample directory:

Pulse Sequence: s2pu1

Solvent: cdcl3

Ambient temperature

File: s2pu1\_H1

INOVA-500 "nmr1roy"

Relax. delay 2.000 sec

Pulse 30.0 degrees

Acq. time 4.000 sec

Width 6410.3 Hz

8 repetitions

OBSERVE H1 399.8047094 MHz

DATA PROCESSING

File size 65536

Total time 1 min, 0 sec

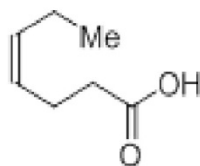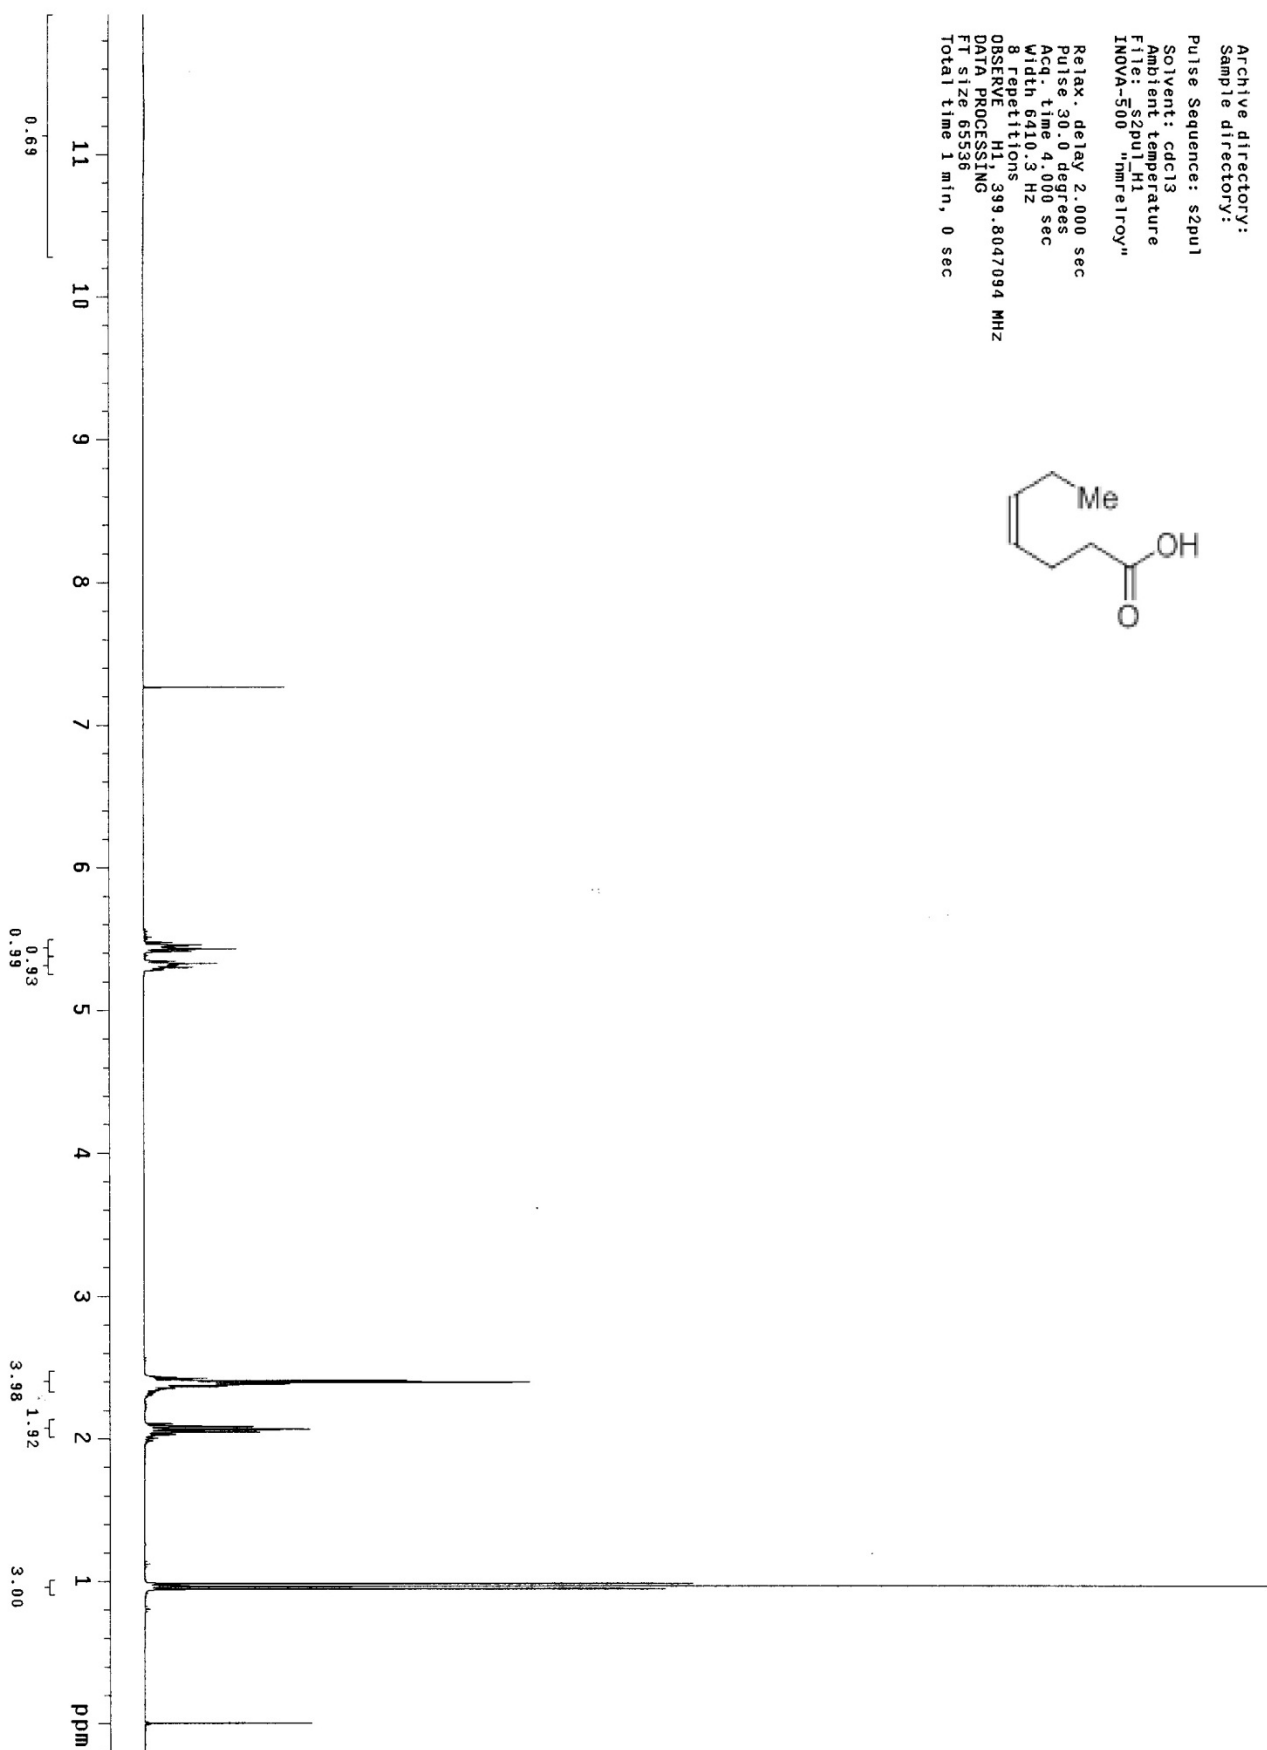

Archive directory:  
Sample directory:

Pulse Sequence: s2pul

Solvent: cdcl3

Ambient temperature

User: 1-14-87

File: s2pul\_C13

INOVA-500 "nmreity"

Relax. delay 2.000 sec

Pulse 30.0 degrees

Acq. time 1.300 sec

Width 24509.8 Hz

256 repetitions

OBSERVE C13, 100.5309747 MHz

DECOUPLE H1, 399.8067105 MHz

Power 44 dB

Continuously on

WALTZ-16 modulated

DATA PROCESSING

FI size 65536

Total time 14 min, 7 sec

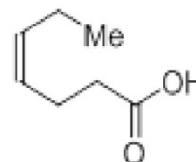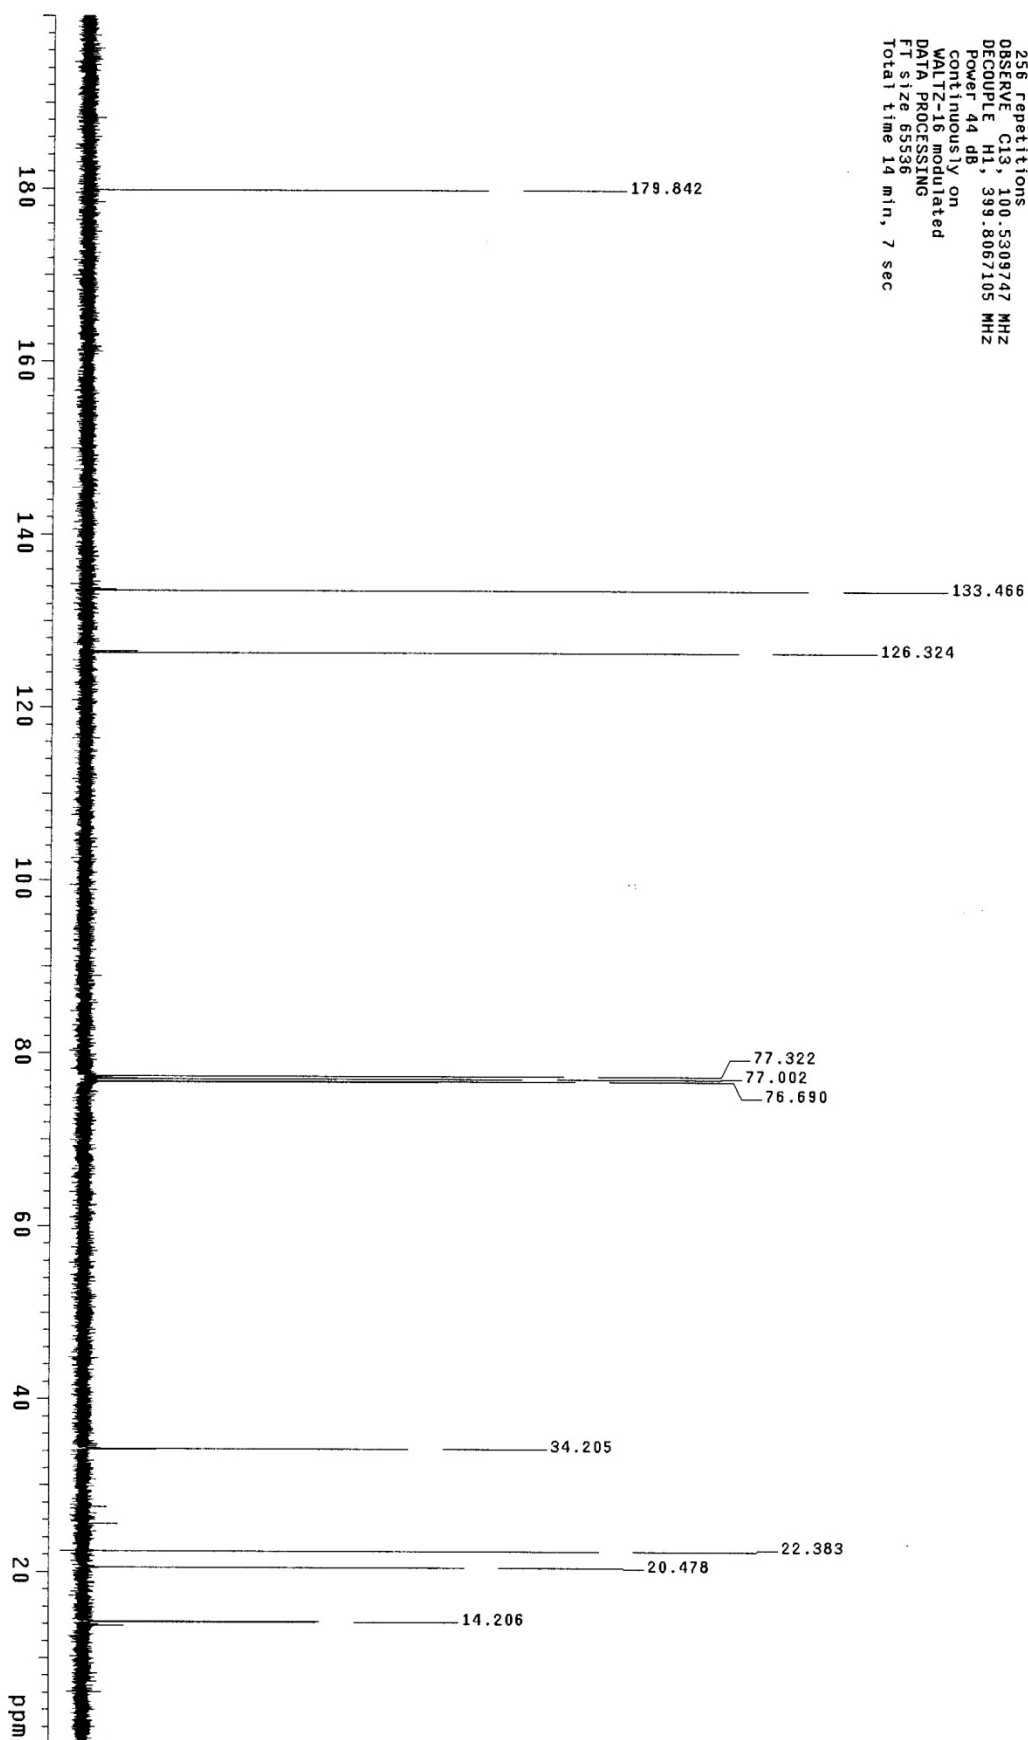

Archive directory:  
 Sample directory:  
 Pulse Sequence: s2pu1  
 Solvent: cdcl3  
 Ambient temperature  
 File: 04\_DHP\_283\_s2pu1\_H1  
 INOVA-500 "nmreitoy"  
 Relax. delay 2.000 sec  
 Pulse 30.0 degrees  
 Acq. time 4.000 sec  
 Width 6410.3 Hz  
 8 repetitions  
 OBSERVE H1, 399.8047100 MHz  
 DATA PROCESSING  
 FT size 65536  
 Total time 1 min, 0 sec

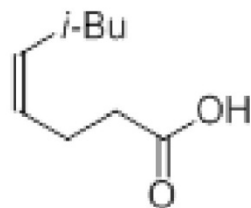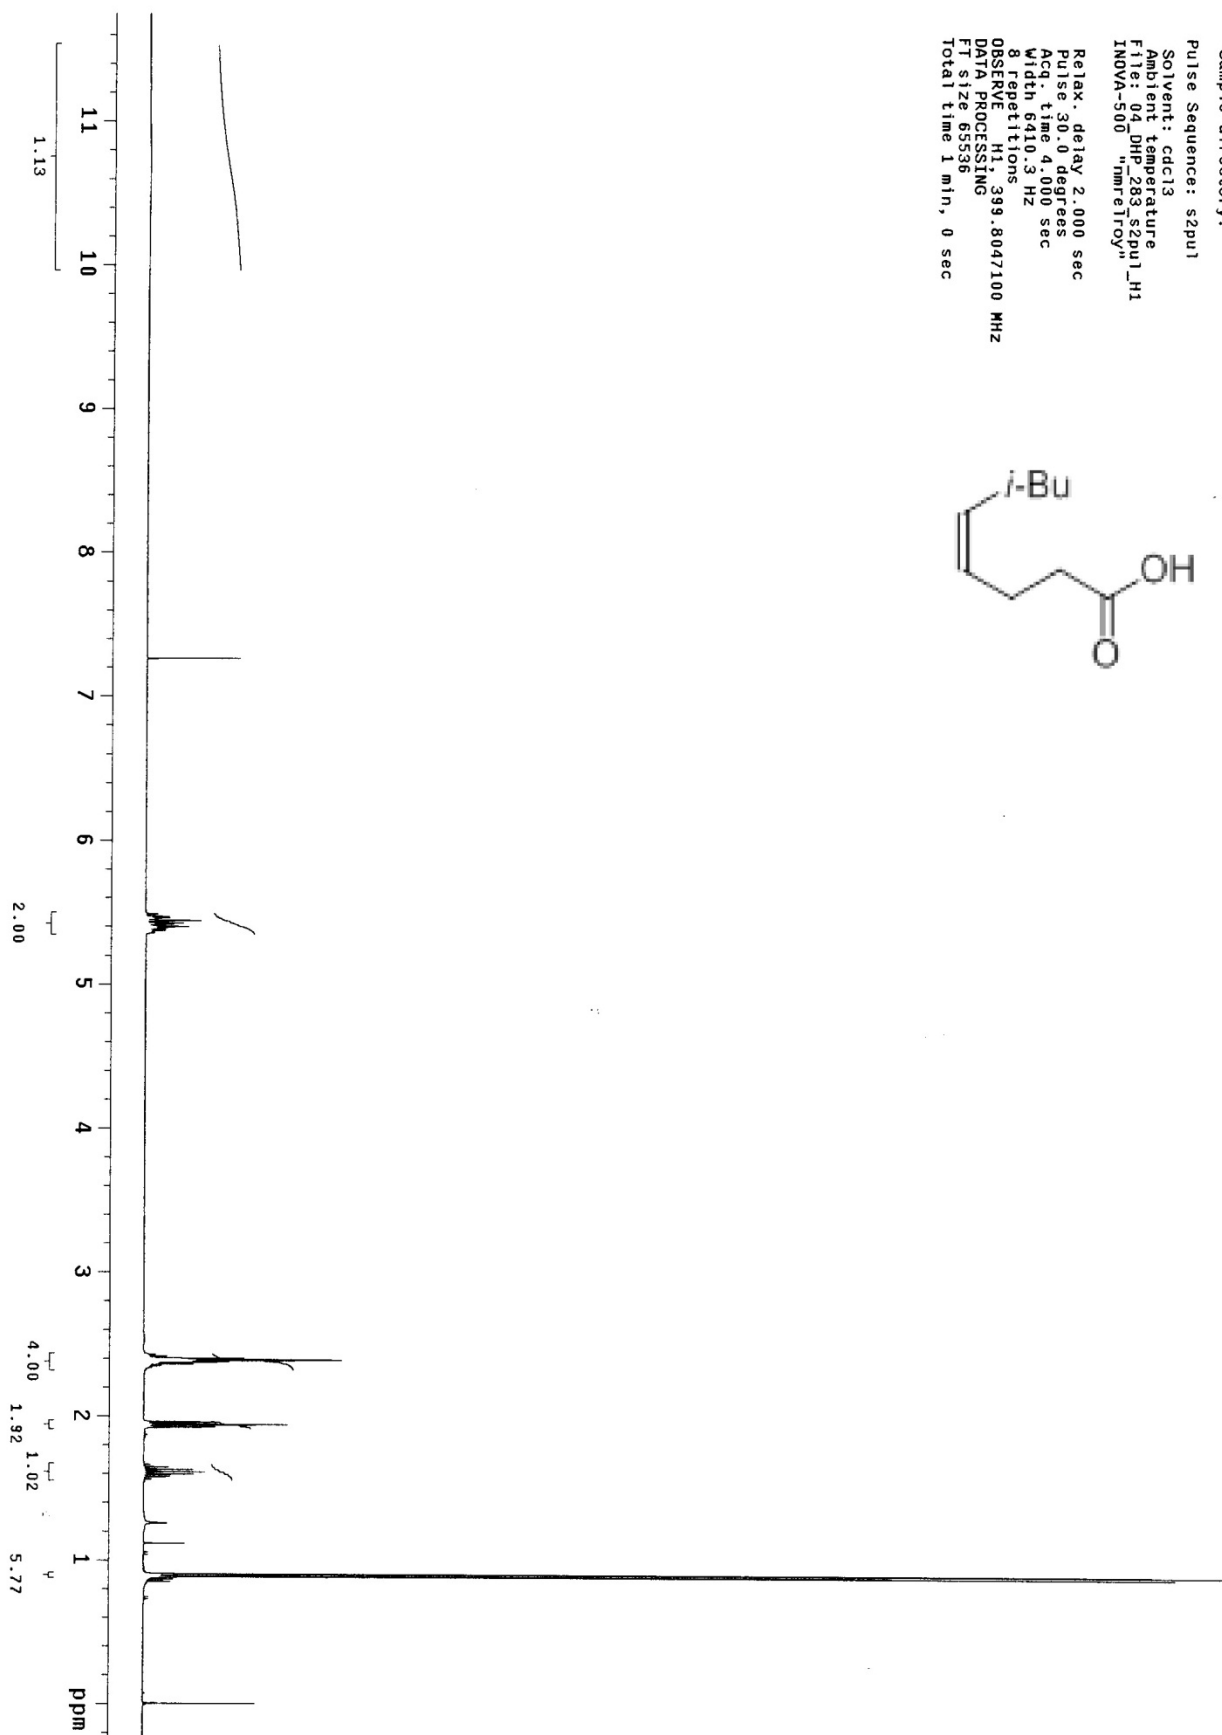

Archive directory:  
Sample directory:

Pulse Sequence: szpul

Solvent: cdcl3

Ambient temperature

User: 1-14-87

File: 04\_DHP\_283\_s2pul\_C13

INOVA-500 "nmrftroy"

Relax. delay 2.000 sec

Pulse 30.0 degrees

Acq. time 1.300 sec

Width 24509.8 Hz

1000 repetitions

OBSERVE C13, 100.5309747 MHz

DECOUPLE H1, 399.8067105 MHz

Power 44 dB

continuously on

WALTZ-16 modulated

DATA PROCESSING

FT size 65536

Total time 55 min, 9 sec

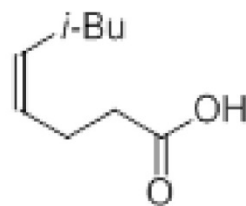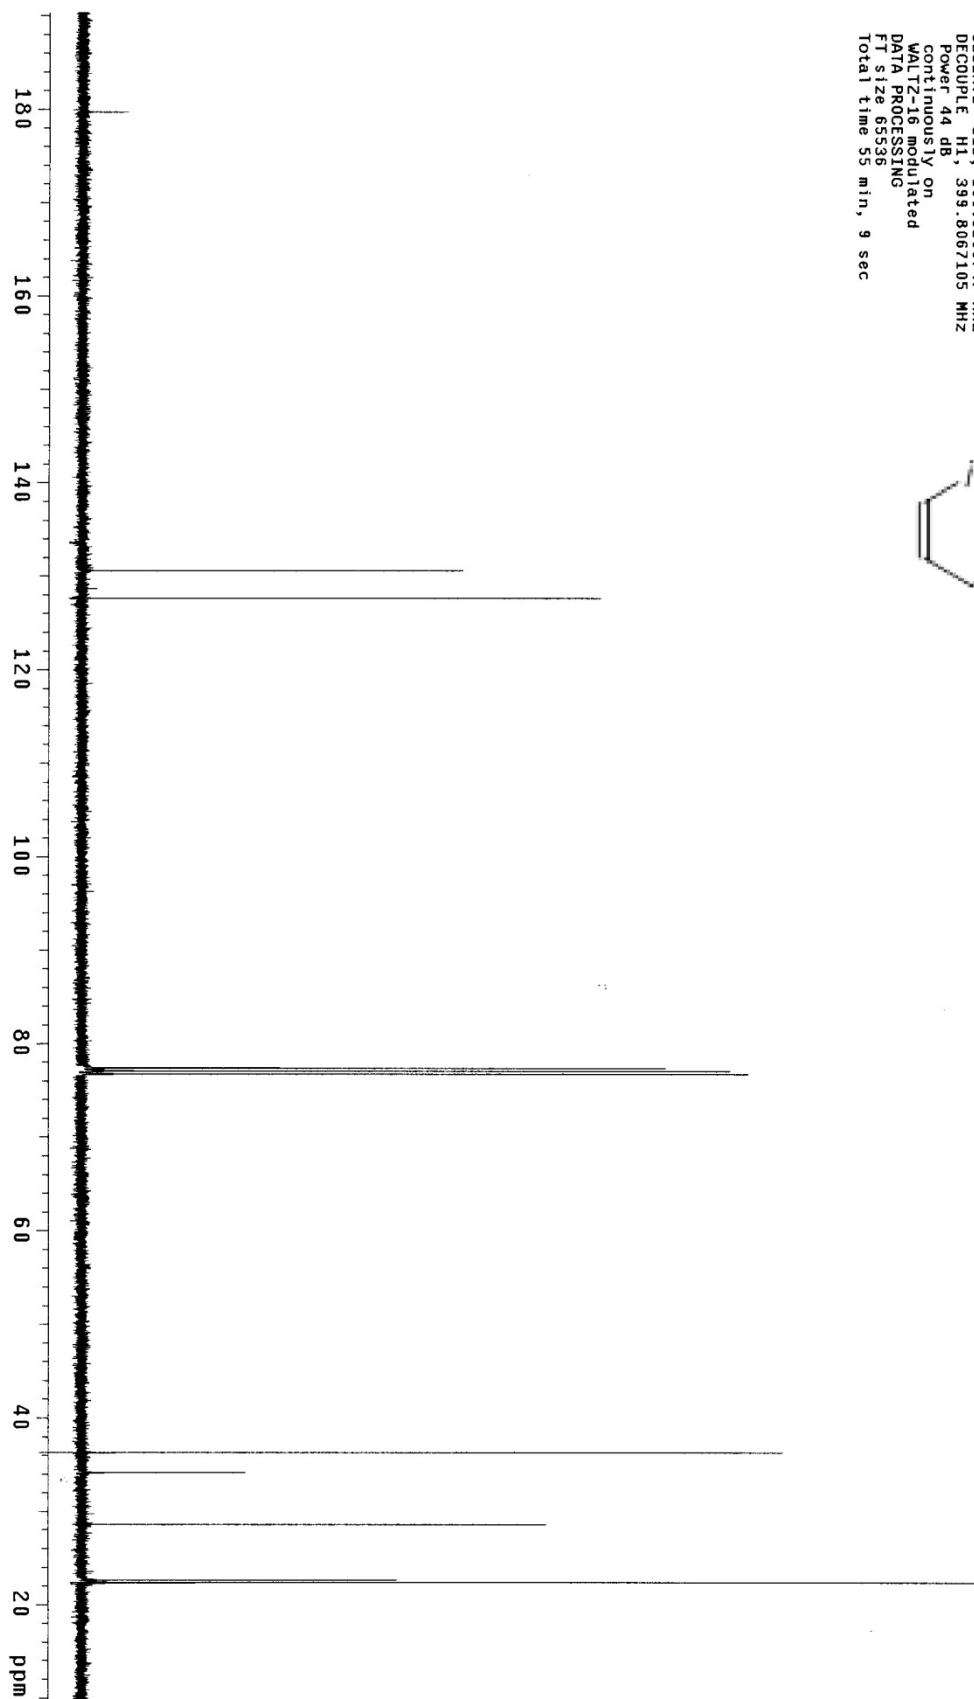

Archive directory:  
Sample directory:  
Pulse Sequence: szpul  
Solvent: cdcl3  
Ambient temperature  
File: 04\_DHP\_289\_s2pul\_H1  
INOVA-500 "nmr1roy"  
Relax. delay 2.000 sec  
Pulse 30.0 degrees  
Acq. time 4.000 sec  
Width 6410.3 Hz  
8 repetitions  
OBSERVE H1, 399.8047098 MHz  
DATA PROCESSING  
FI size 65536  
Total time 1 min, 0 sec

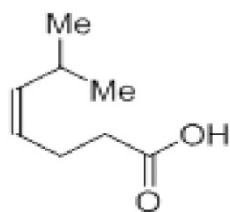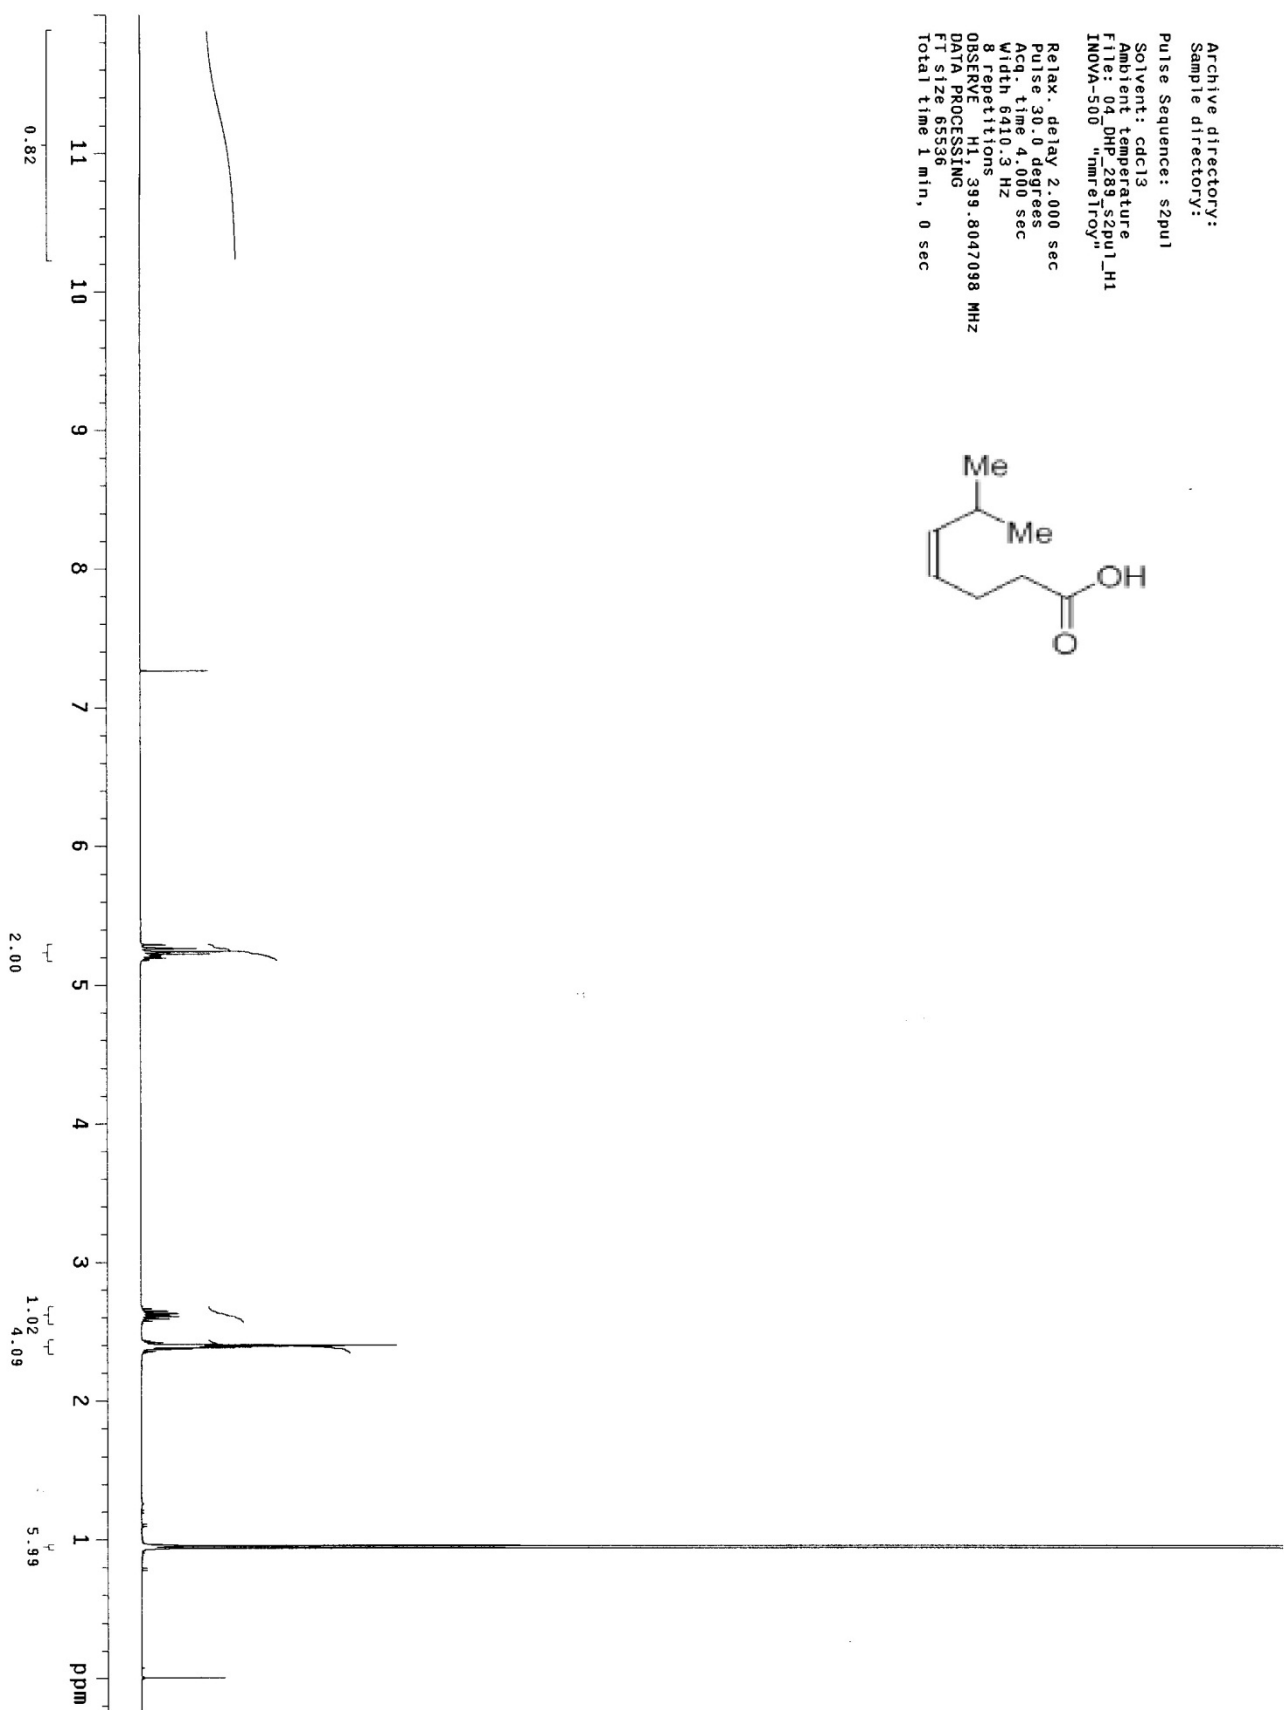

Archive directory:  
Sample directory:

Pulse Sequence: szpul  
Solvent: cdcl3  
Ambient temperature  
User: 1-14-87  
File: 04\_DHP\_289\_szpul\_C13  
INOVA-500 "nmreflroy"

Relax. delay 2.000 sec  
Pulse 30.0 degrees  
Acq. time 1.300 sec  
Width 24509.8 Hz  
512 Repetitions  
OBSERVE C13, 100.5309747 MHz  
DECUPLE H1, 399.8067105 MHz  
Power 44 dB  
continuously on  
WALTZ-16 modulated  
DATA PROCESSING  
FT size 65536  
Total time 28 min, 14 sec

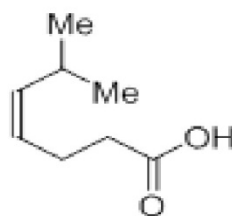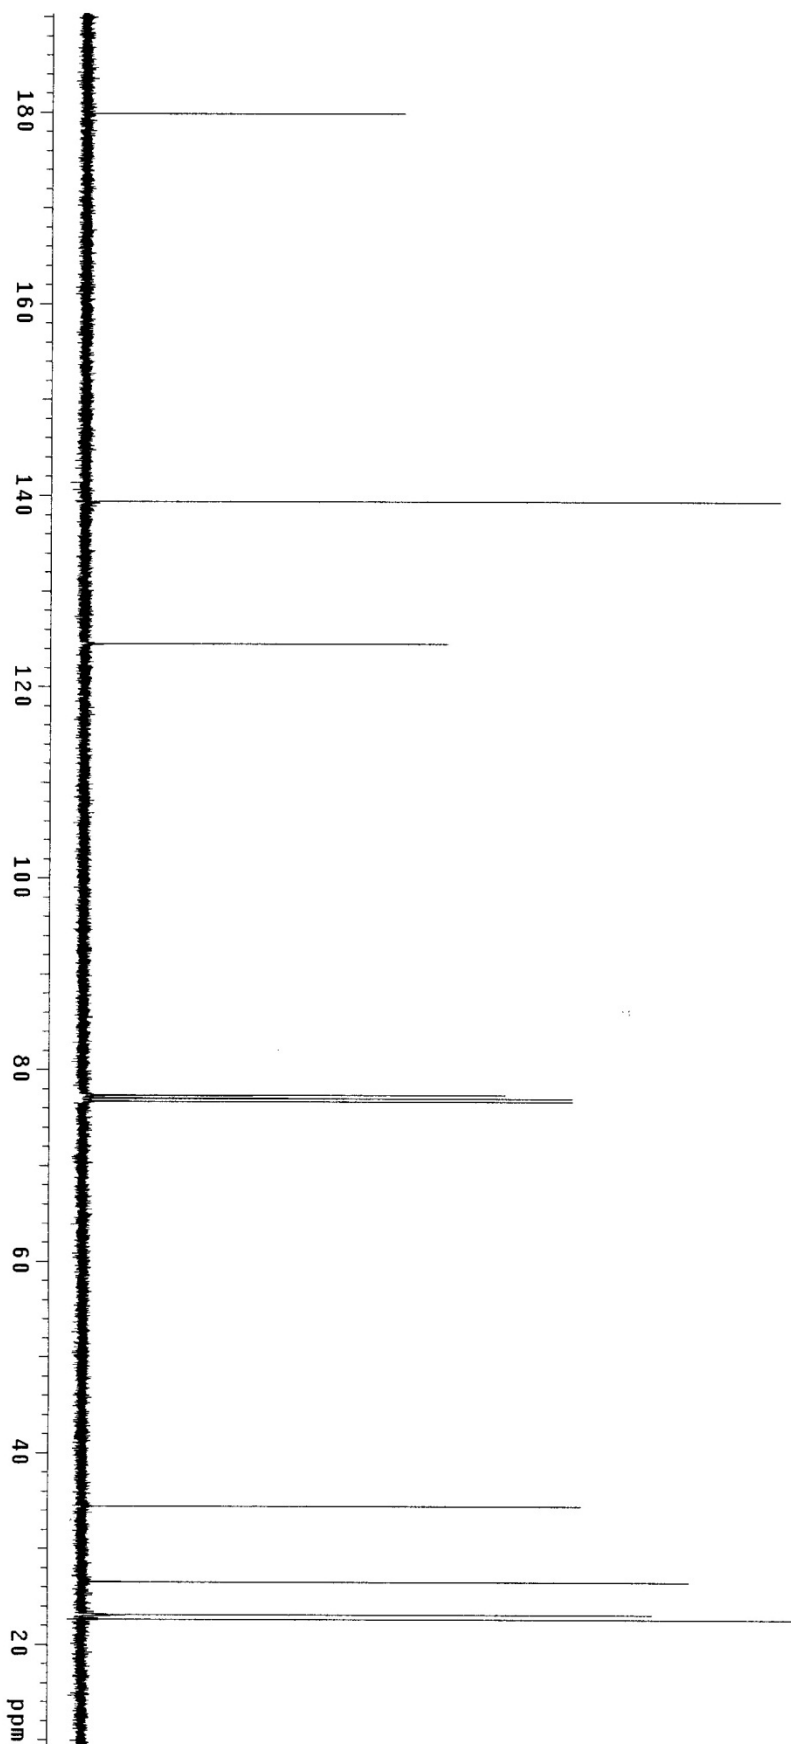

Archive directory:  
Sample directory:

Pulse Sequence: s2pu1  
Solvent: cdcl3  
Ambient temperature  
File: 04\_DHP\_287\_s2pu1\_H1  
INOVA-500 "nmr1roy"

Relax. delay 2.000 sec  
Pulse 30.0 degrees  
Acq. time 4.000 sec  
Width 6410.3 Hz  
8 repetitions  
OBSERVE H1, 399.8047102 MHz  
DATA PROCESSING  
F1 size 65536  
Total time 1 min, 0 sec

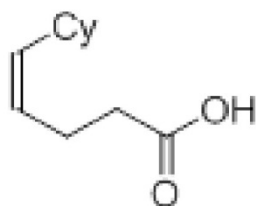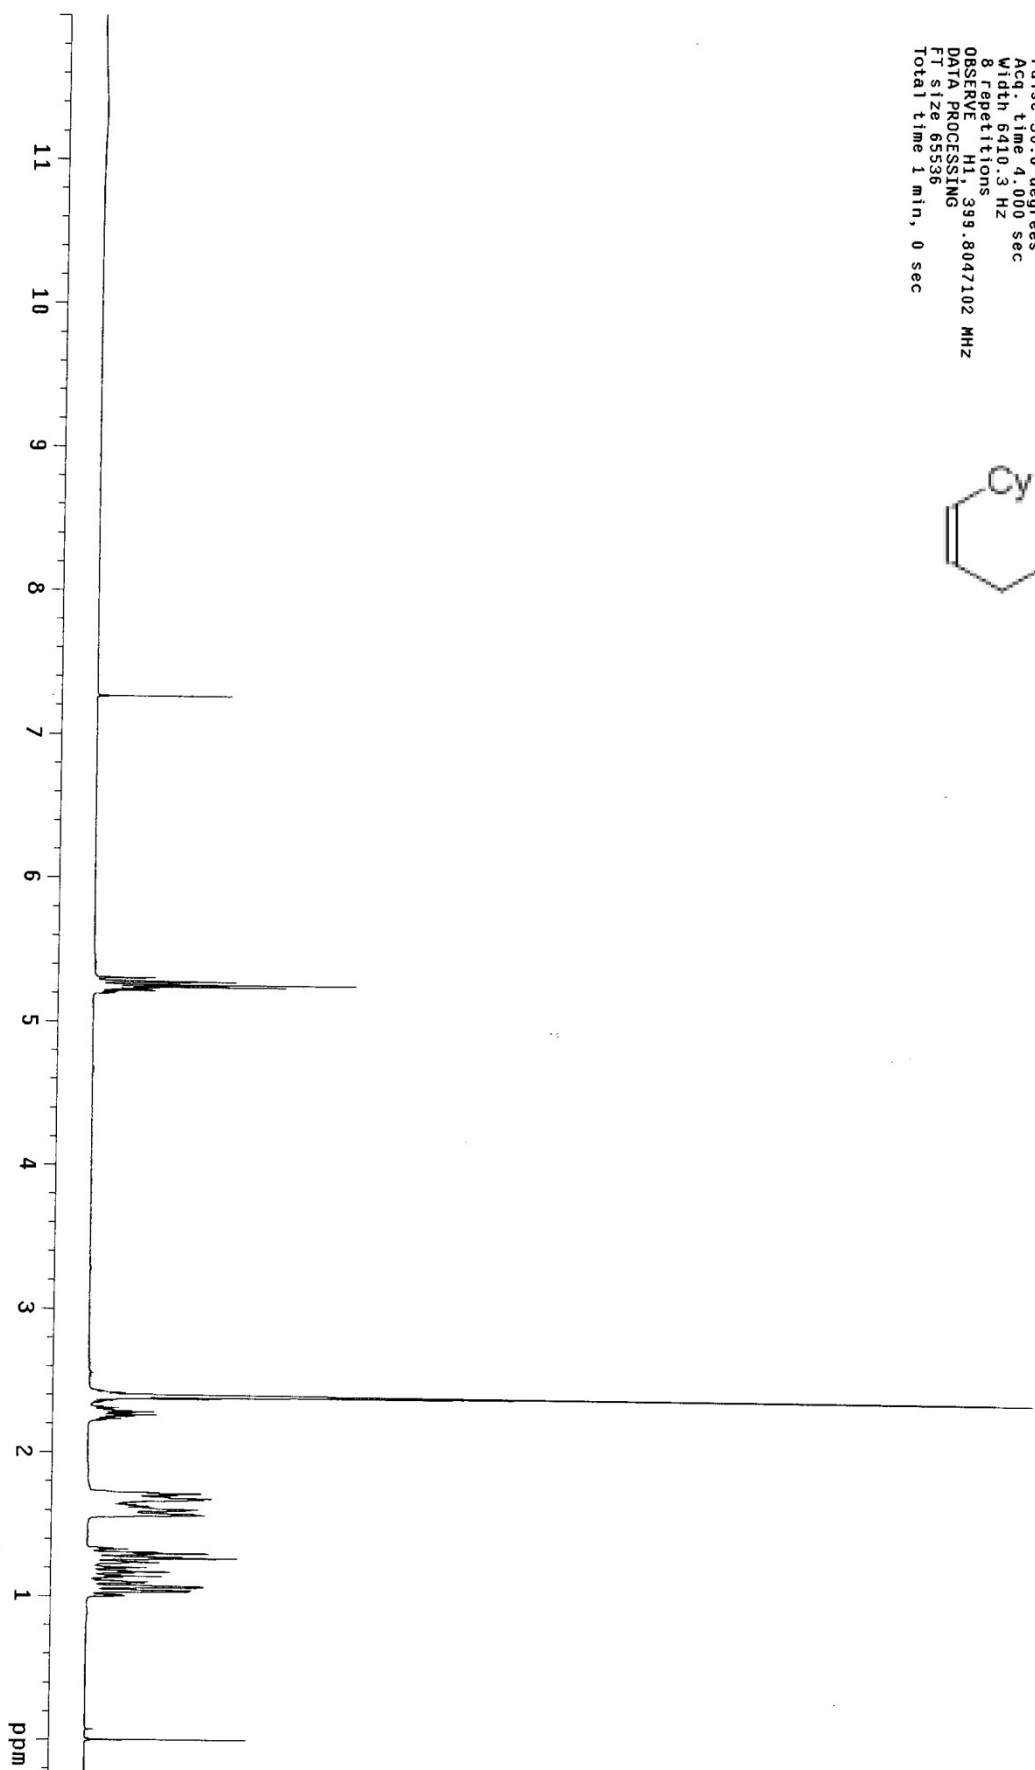

Archive directory:  
Sample directory:

Pulse Sequence: s2pul

Solvent: cdc13  
Ambient temperature  
User: 1-14-87  
File: 04.DHP.287.s2pul\_C13  
INOVA-500 "nmretoy"

Relax. delay 2.000 sec  
Pulse 30.0 degrees  
Acq. time 1.300 sec  
Width 24509.8 Hz  
512 repetitions  
OBSERVE C13, 100.5309747 MHz  
DECUPLE H1, 399.8067105 MHz  
Power 44 dB  
continuously on  
WALTZ-16 modulated  
DATA PROCESSING  
F1 size 65536  
Total time 28 min, 14 sec

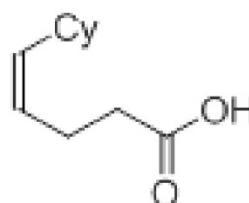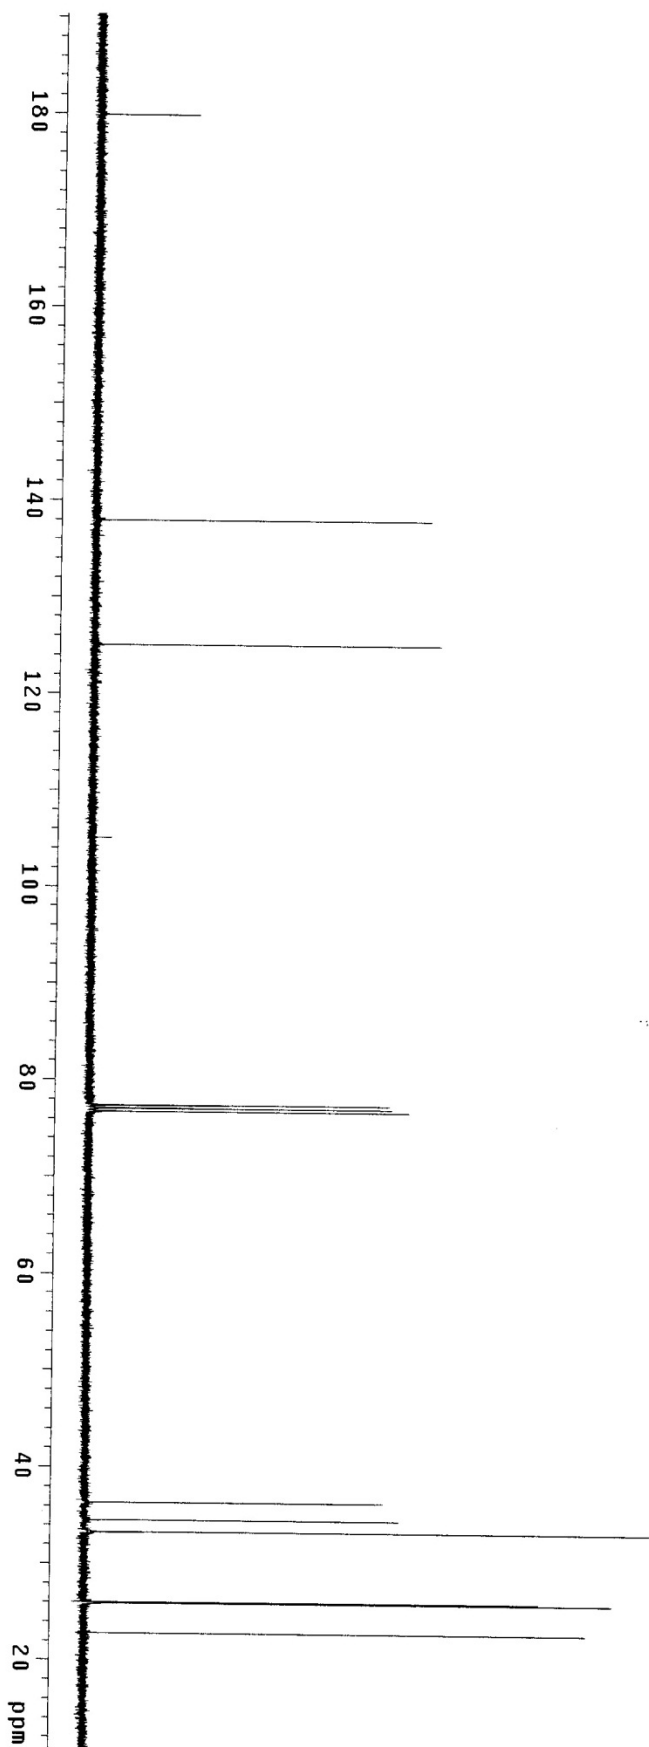

Archive directory:  
Sample directory:

Pulse Sequence: s2pul

Solvent: cdcl3

Ambient temperature

F1file: 04\_0hp\_295\_s2pul\_H1

INOVA-500 "nmr1roy"

Relax. delay 2.000 sec

Pulse 30.0 degrees

Acq. time 4.000 sec

Width 6410.3 Hz

8 repetitions

OBSERVE H1

DATA PROCESSING

FT size 65536

Total time 1 min, 0 sec

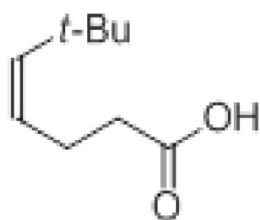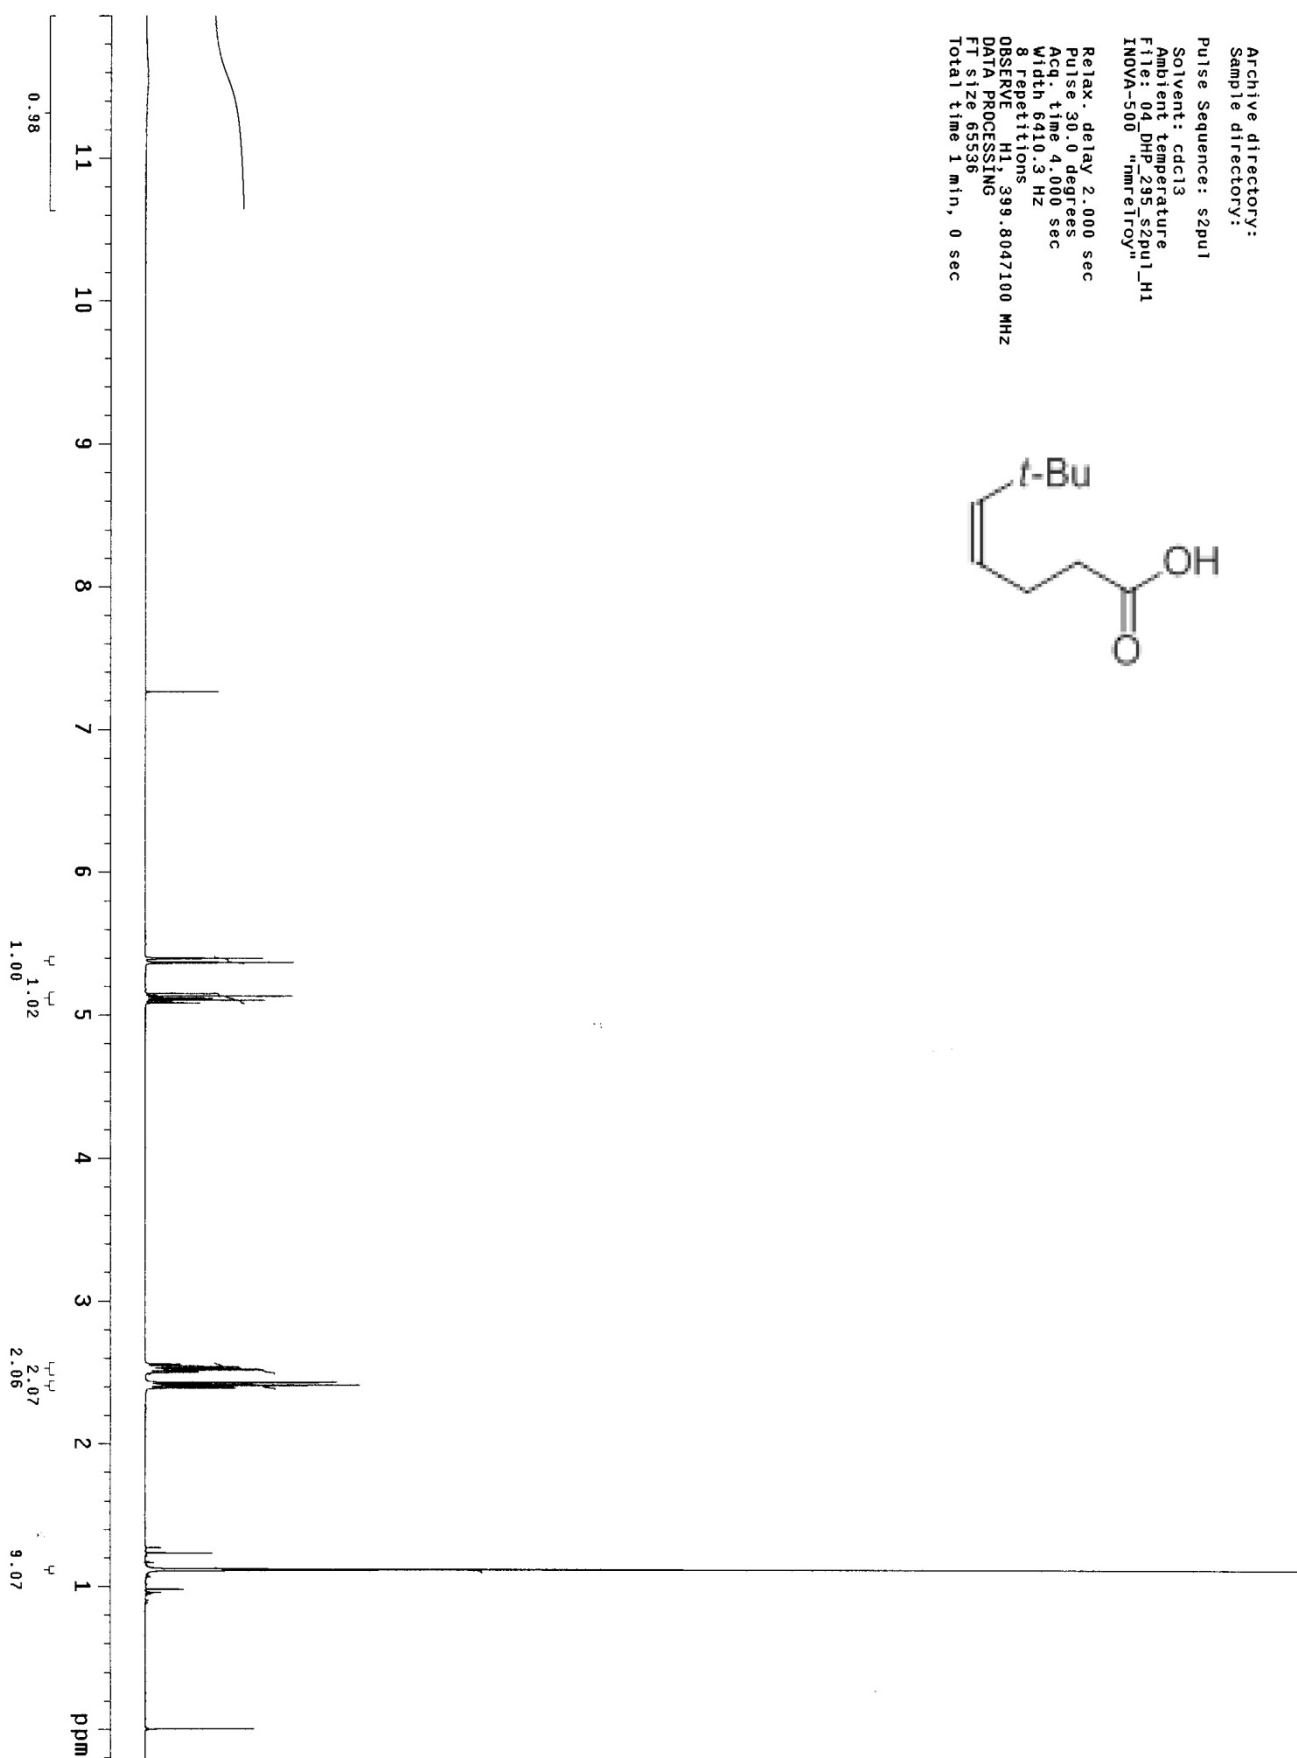

Archive directory:  
Sample directory:

Pulse Sequence: s2pul

Solvent: cdcl3

Ambient temperature

User: 1-14-87

File: 04.DHP\_295\_s2pul\_C13

INOVA-500 "nmr1roy"

Relax. delay 2.000 sec

Pulse 30.0 degrees

Acq. time 1.300 sec

Width 24509.8 Hz

512 repetitions

OBSERVE C13, 100.5309747 MHz

DECOUPLE H1, 399.8067105 MHz

Power 44 dB

continuously on

WALTZ-16 modulated

DATA PROCESSING

FT size 65536

Total time 28 min, 14 sec

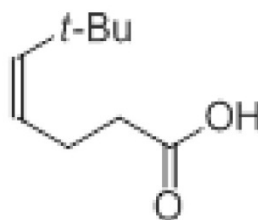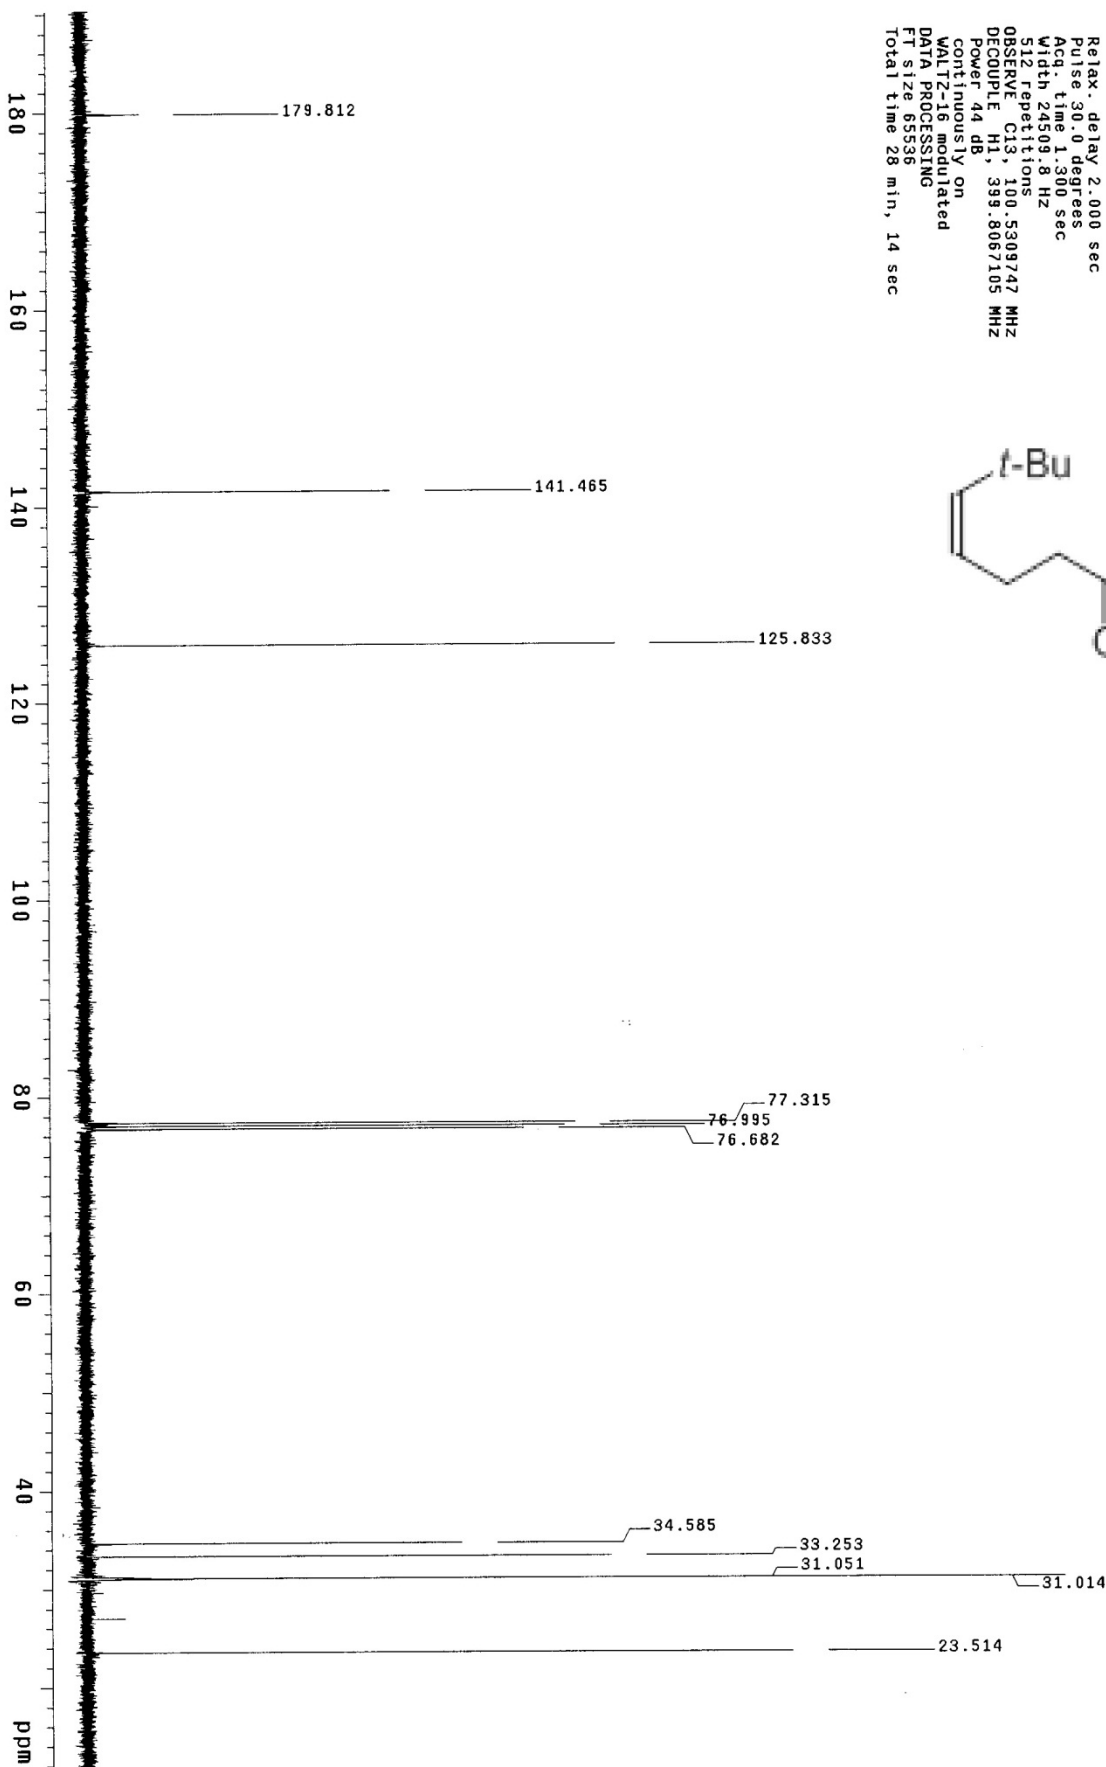

STANDARD 1H OBSERVE

Pulse Sequence: s2pu1

Solvent: CDCl3

Ambient temperature

UNITPuls-300 "mmr2"

Relax. delay 1.000 sec

Pulse 15.0 degrees

Acq. time 3.813 sec

Width 4196.4 Hz

8 repetitions

OBSERVE H1, 300.1390251 MHz

DATA PROCESSING

Line broadening 0.1 Hz

FT size 32768

Total time 0 min, 38 sec

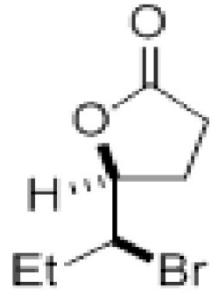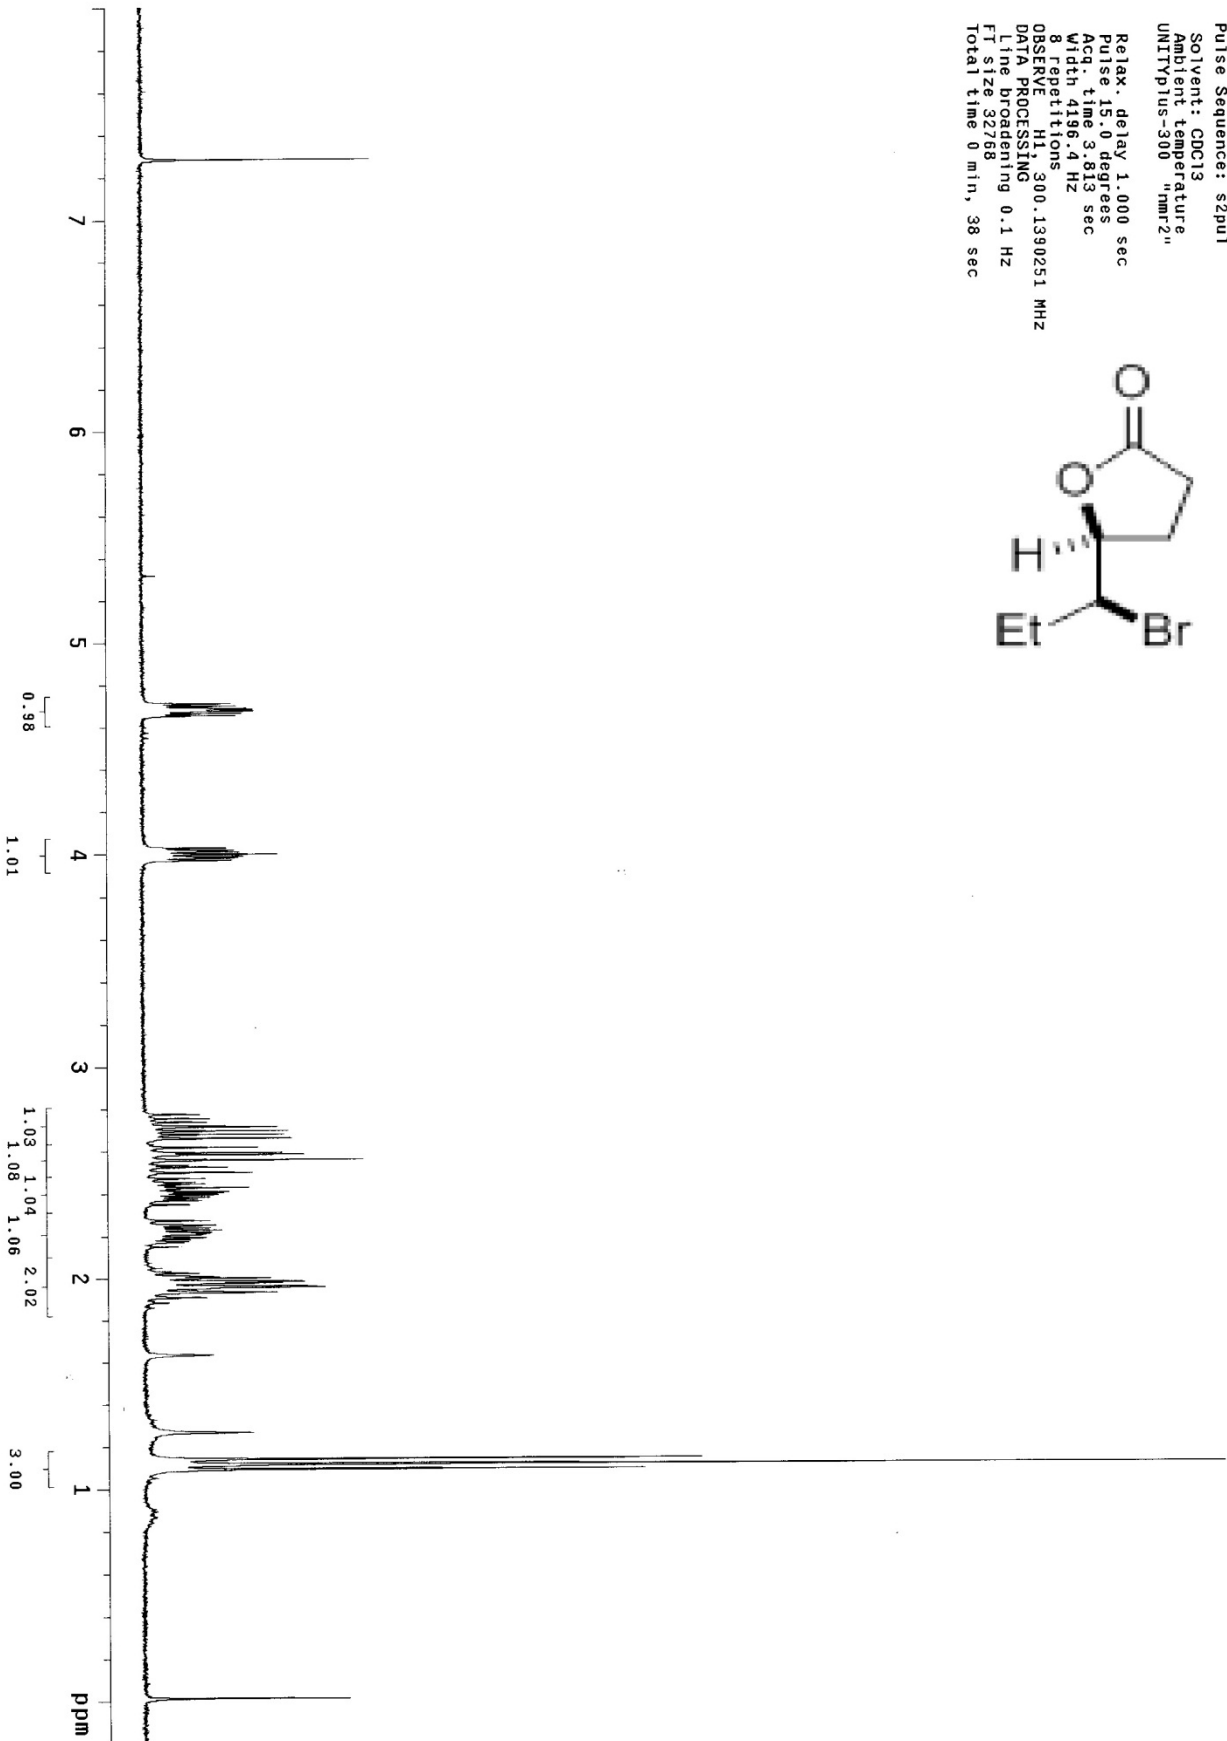

Sequence: s2pu1  
 Solvent: CDCl<sub>3</sub>  
 Ambient temperature  
 UNIT: 1000 MHz  
 Relax. delay 2.000 sec  
 Pulse 36.0 degrees  
 Acq. time 1.777 sec  
 Width 18009.9 Hz  
 992 repetitions  
 OBSERVE C13, 75.470216 MHz  
 DECOUPLE H1, 300.1409259 MHz  
 Power 40 dB  
 continuously on  
 WALTZ-16 modulated  
 Single precision data  
 DATA PROCESSING  
 FT size 65536  
 Total time 1 hr, 4 min, 53 sec

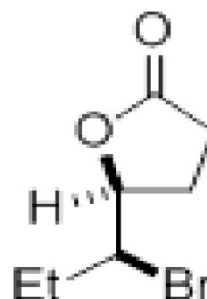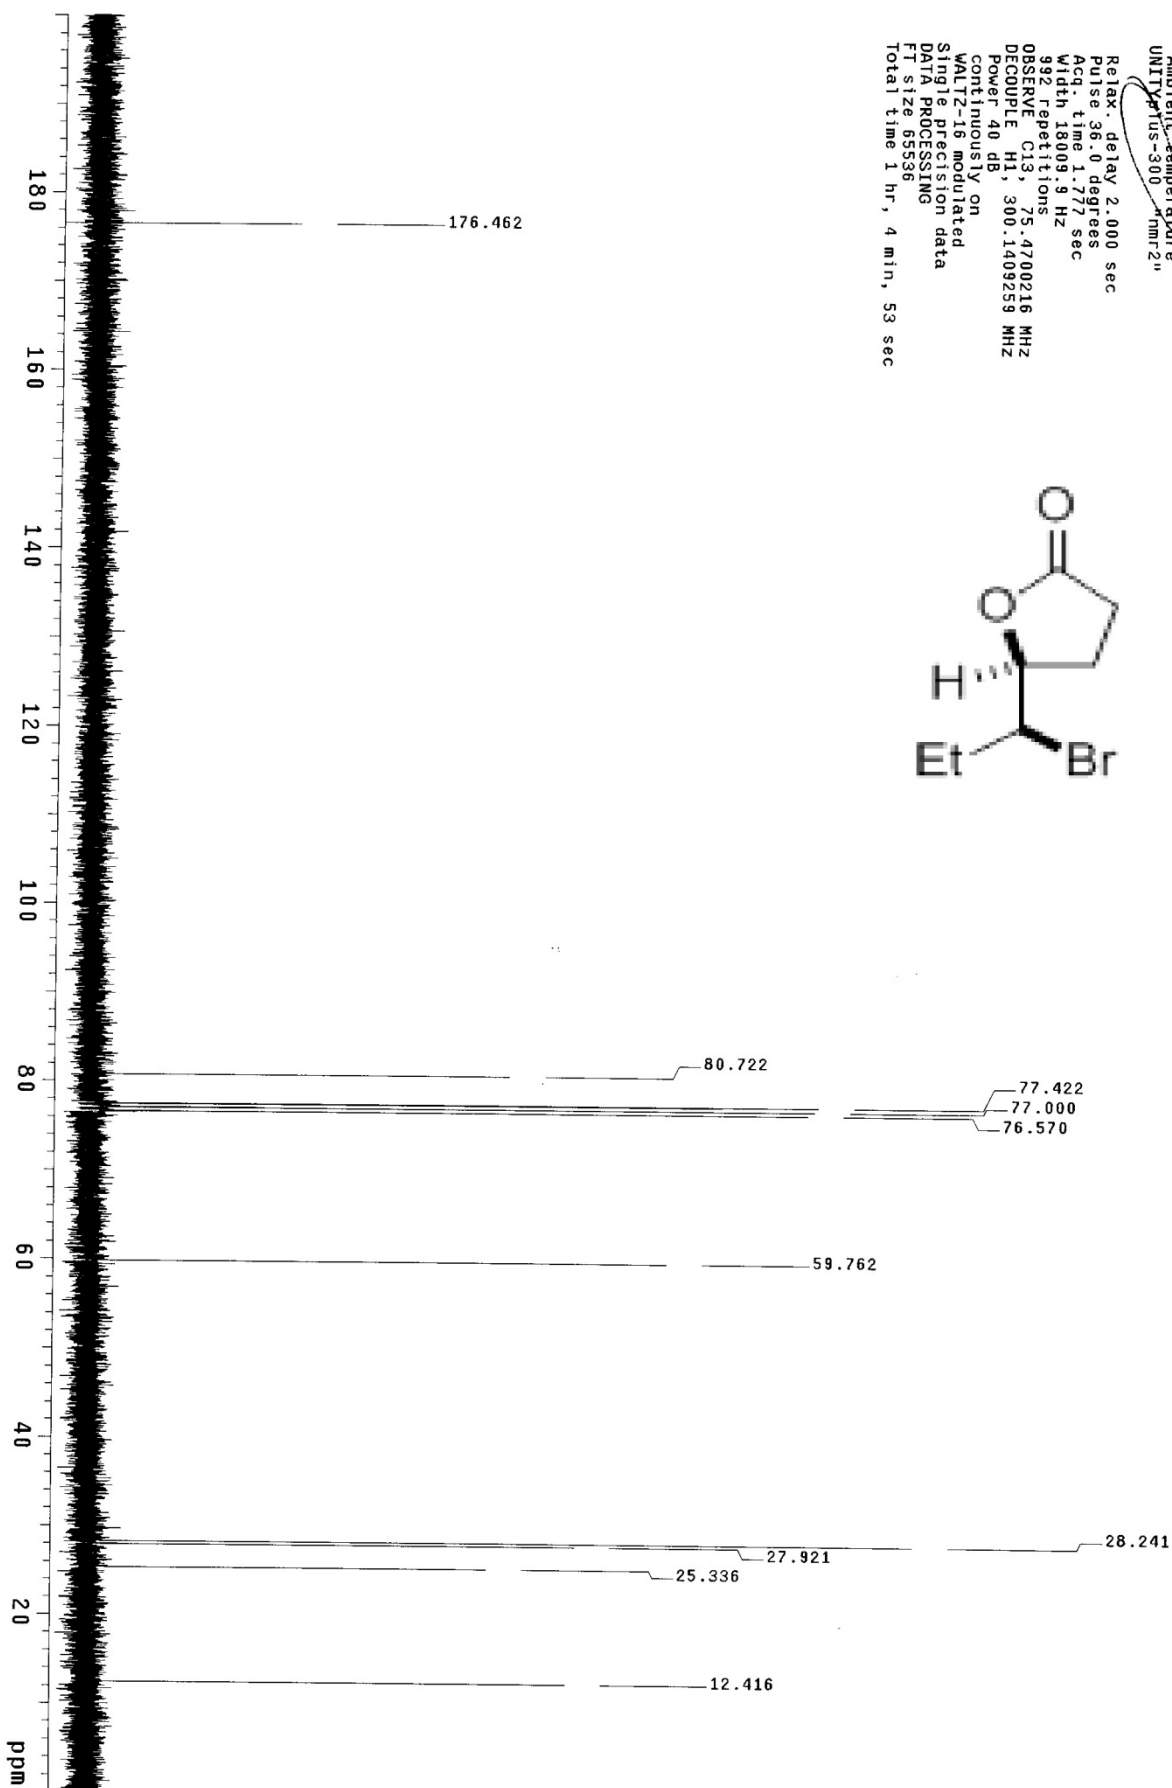

STANDARD 1H OBSERVE

Pulse Sequence: s2pu1  
Solvent: CDCl3  
Ambient temperature  
UNIT: plus-300 "mmr2"

Relax. delay 1.000 sec  
Pulse 15.0 degrees  
Acq. time 3.813 sec  
Width 4196.4 Hz  
16 repetitions  
OBSERVE H1, 300.1390272 MHz  
DATA PROCESSING  
Line broadening 0.1 Hz  
FT size 32768  
Total time 1 min, 17 sec

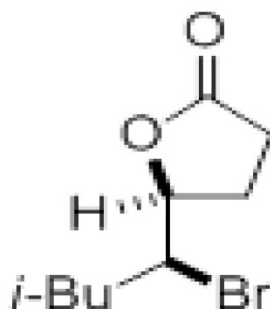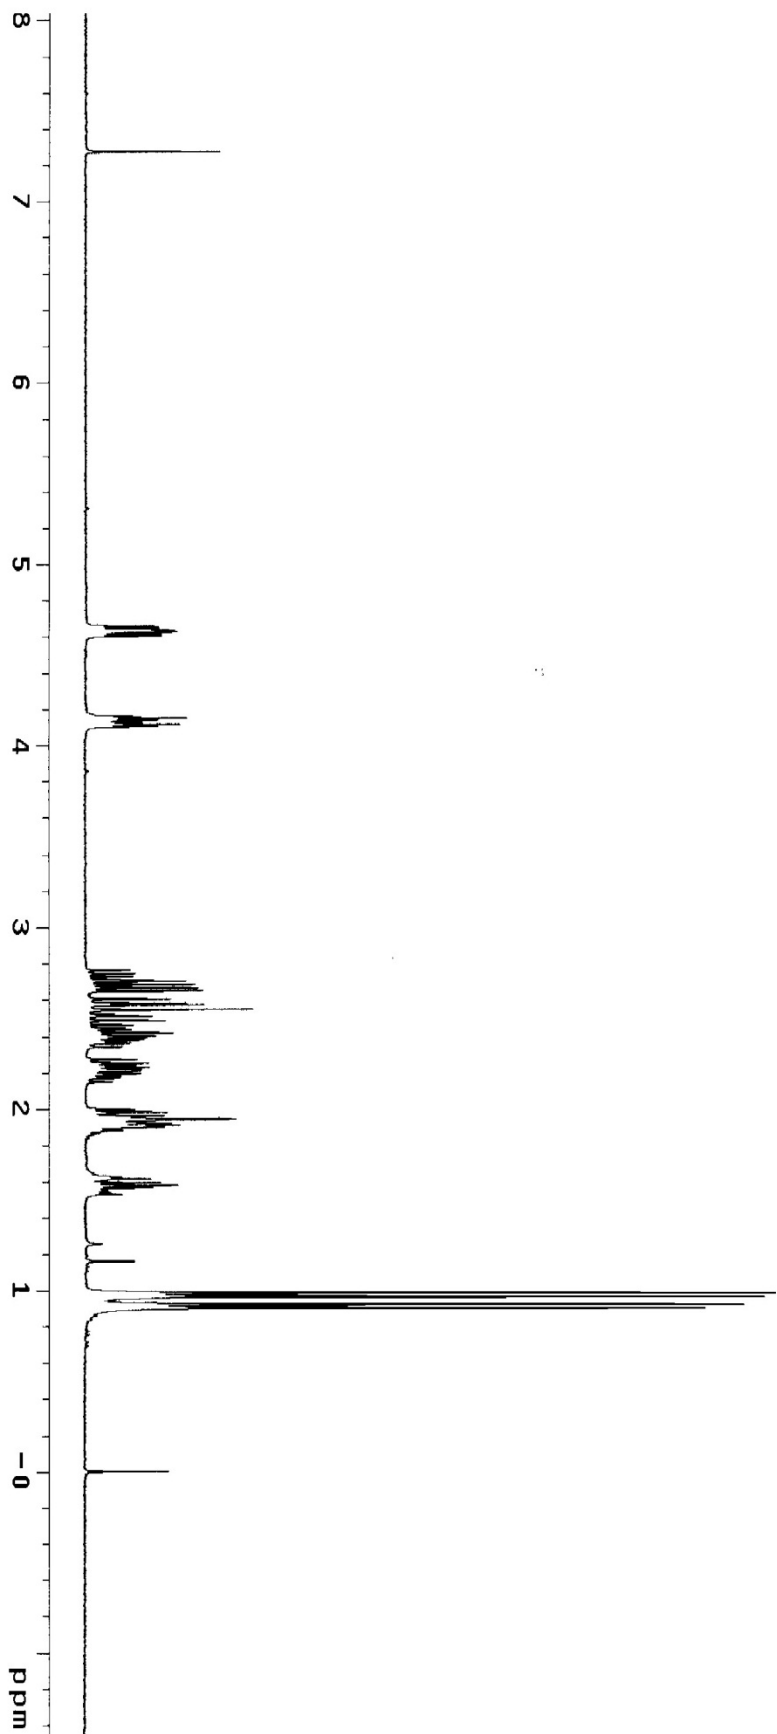

13C OBSERVE

Pulse Sequence: s2pul  
Solvent: CDCl<sub>3</sub>  
Ambient temperature  
UNITYplus-300 "nmr2"

Relax. delay 2.000 sec  
Pulse 36.0 degrees  
Acq. time 1.777 sec  
Width 18009.9 Hz  
332 repetitions  
OBSERVE C13, 75.4700216 MHz  
DECOUPLE H1, 300.1409259 MHz  
Power 40 dB  
continuously on  
WALTZ-16 modulated  
Single precision data  
DATA PROCESSING  
Line broadening 1.0 Hz  
FT size 65536  
Total time 1 hr, 4 min, 38 sec

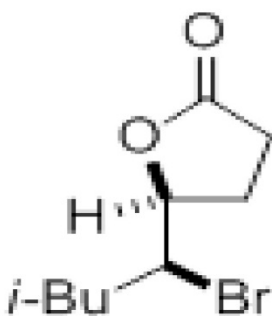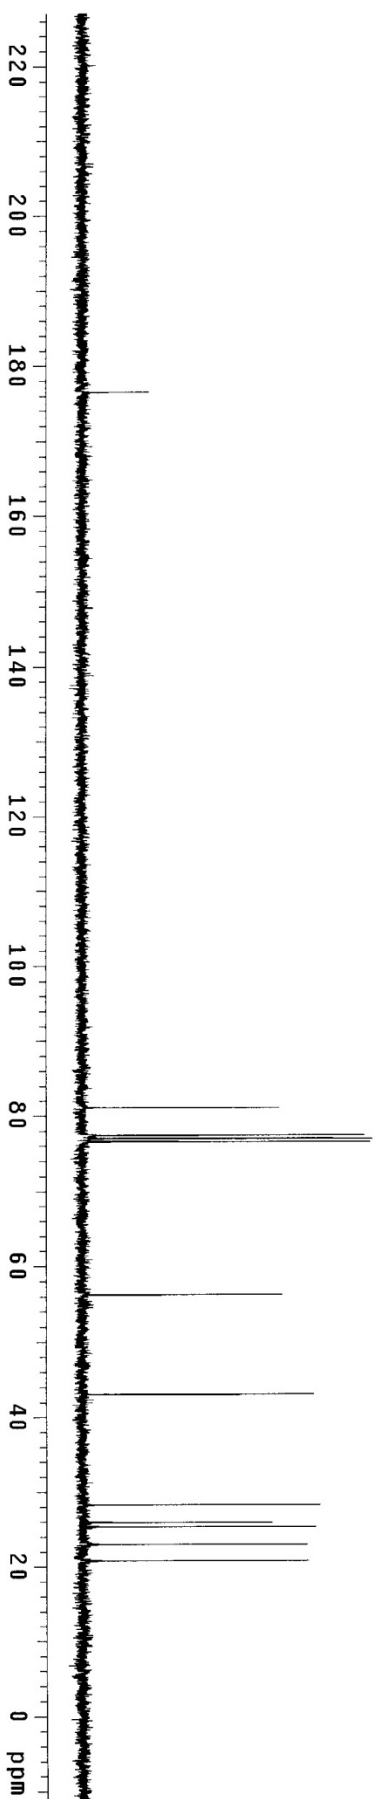

Archive directory:  
Sample directory:

Pulse Sequence: s2pul

Solvent: cdcl3

Ambient temperature

File: 04 DHP 292.s2pul\_H1

INOVA-500 "nmrfroy"

Relax. delay 2.000 sec

Pulse 30.0 degrees

Acq. time 4.000 sec

Width 6410.3 Hz

8 repetitions

OBSERVE H1; 399.8047053 MHz

DATA PROCESSING

FI size 65536

Total time 1 min, 0 sec

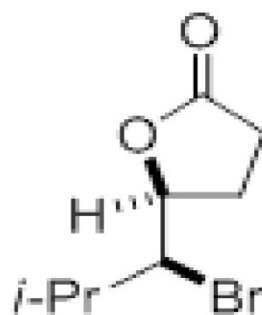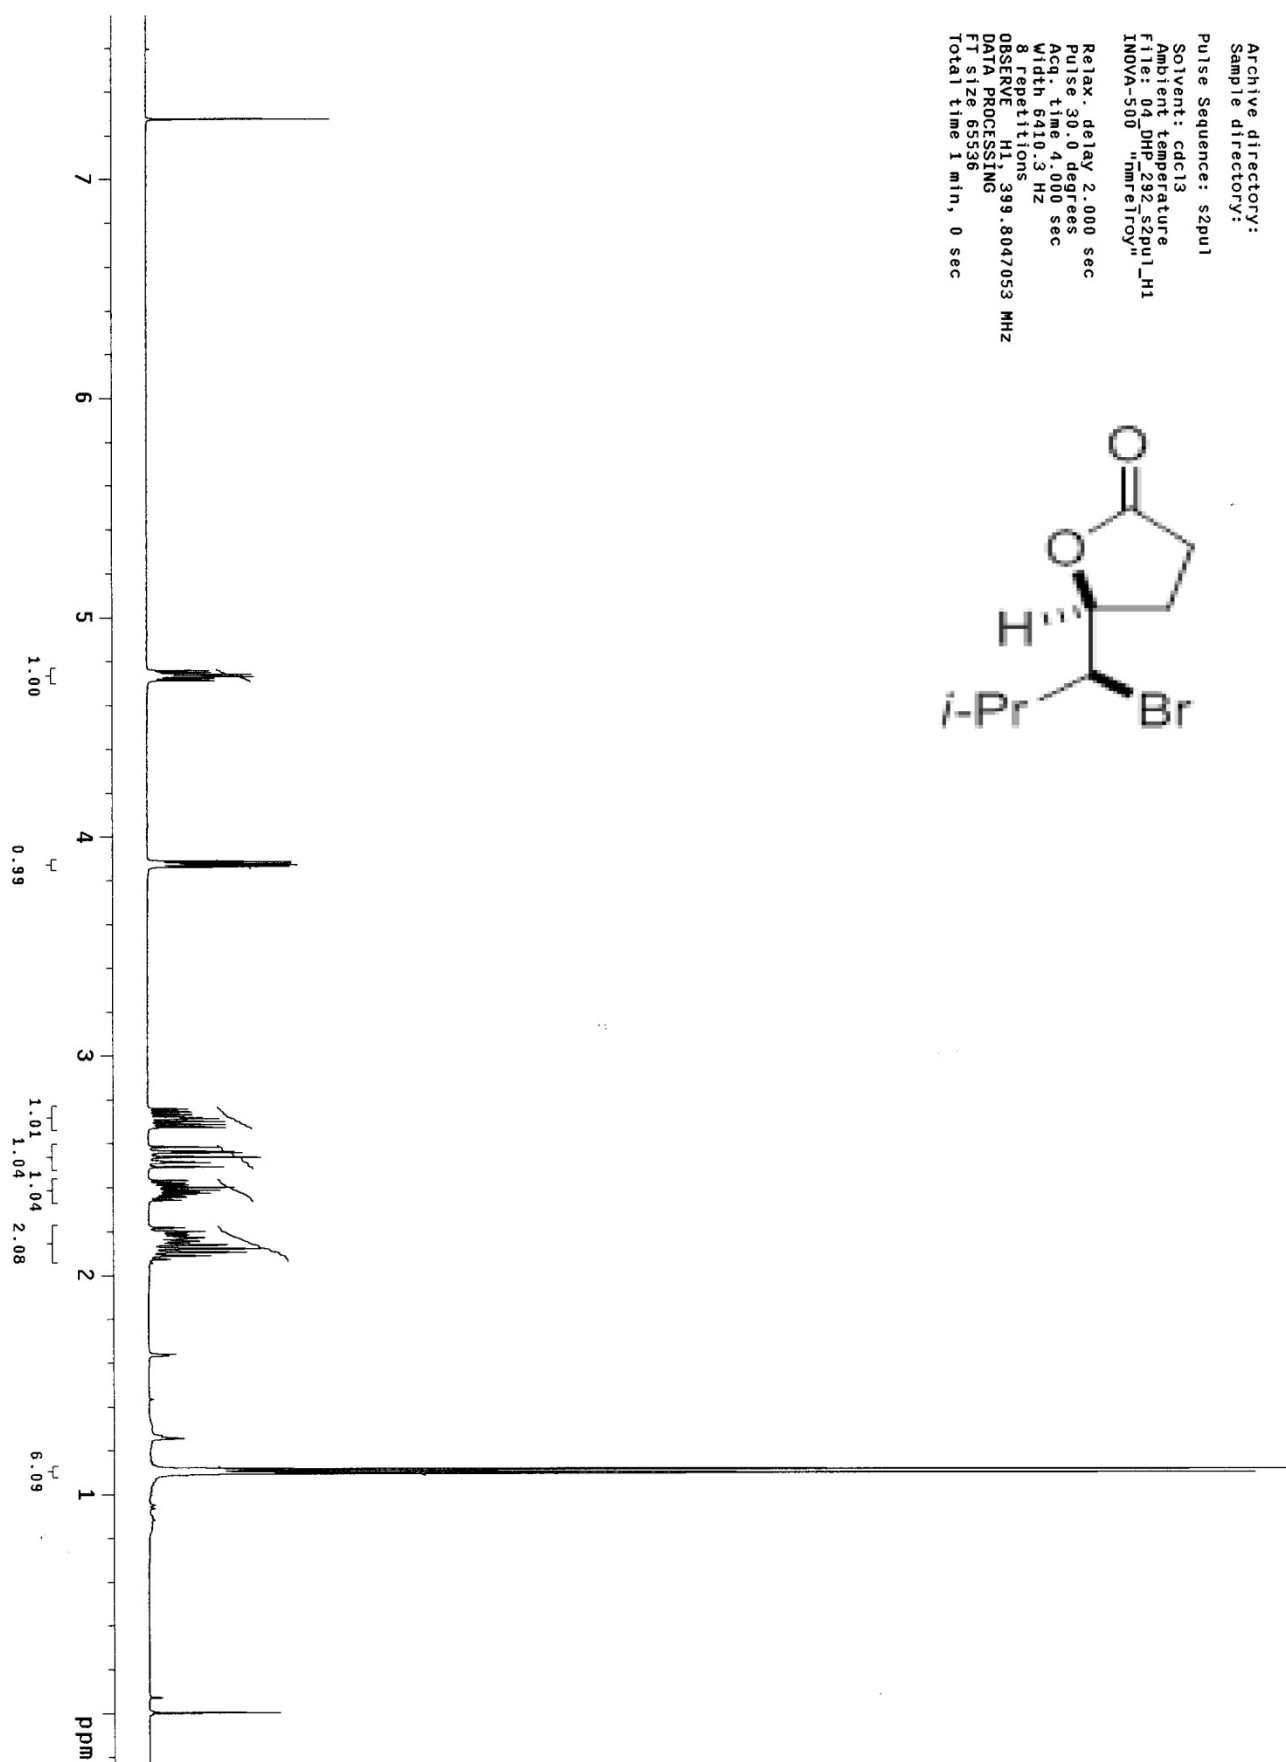

Archive directory:  
Sample directory:

Pulse Sequence: s2pul

Solvent: cdcl3

Ambient temperature

User: 1-14-87

File: 04 DHP 292 s2pul\_C13

INOVA-500 "nmr1roy"

Relax. delay 2.000 sec

Pulse 30.0 degrees

Acq. time 1.300 sec

Width 24509.8 Hz

512 repetitions

OBSERVE C13, 100.5309747 MHz

DECOUPLE H1, 399.8067105 MHz

Power 44 dB

continuously on

WALTZ-16 modulated

DATA PROCESSING

FT size 65536

Total time 28 min, 14 sec

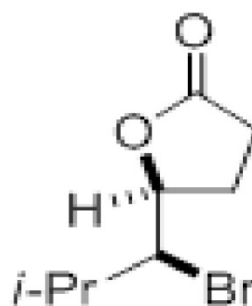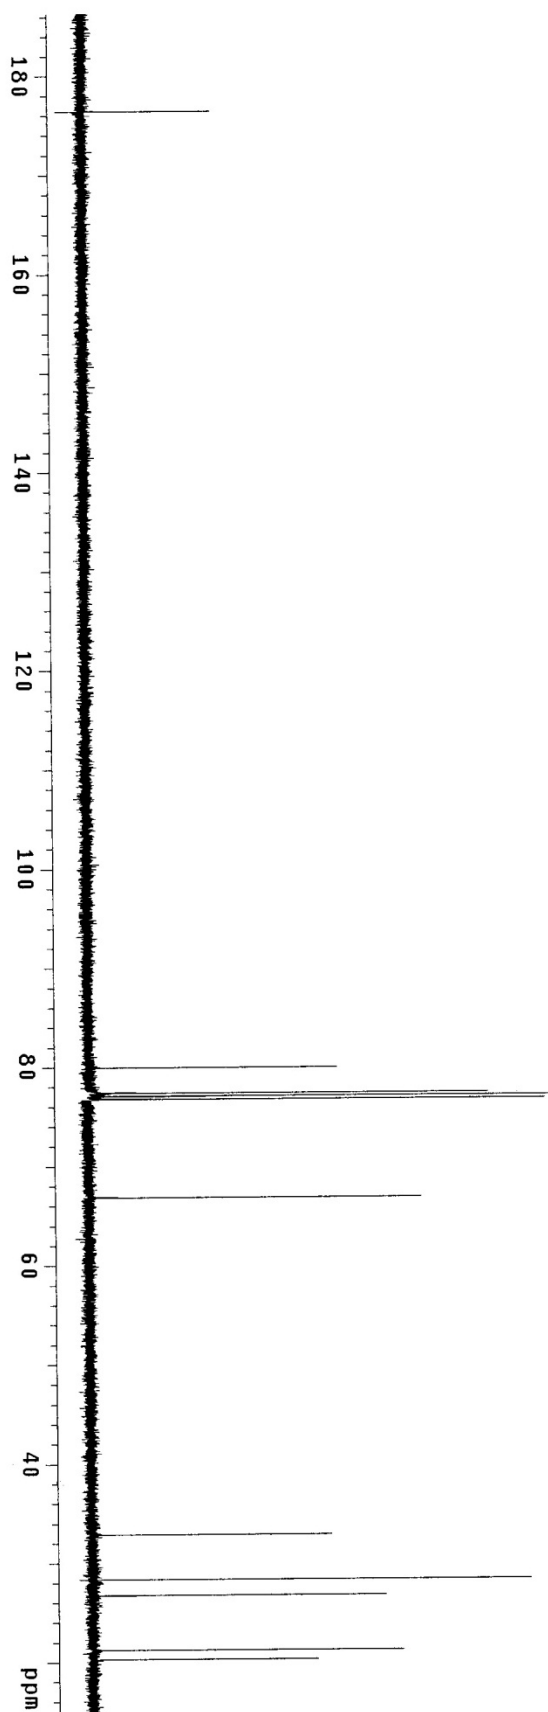

STANDARD 1H OBSERVE

Pulse Sequence: szpul  
Solvent: CDCl3  
Ambient temperature  
UNITYplus-300 "nmr2"  
Relax. delay 1.000 sec  
Pulse 15.0 degrees  
Acq. time 3.813 sec  
Width 4196.4 Hz  
16 repetitions  
OBSERVE H1, 300.1390288 MHz  
DATA PROCESSING  
Line broadening 0.1 Hz  
FT size 32768  
Total time 1 min, 17 sec

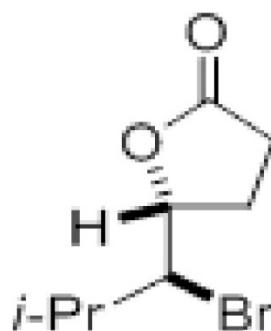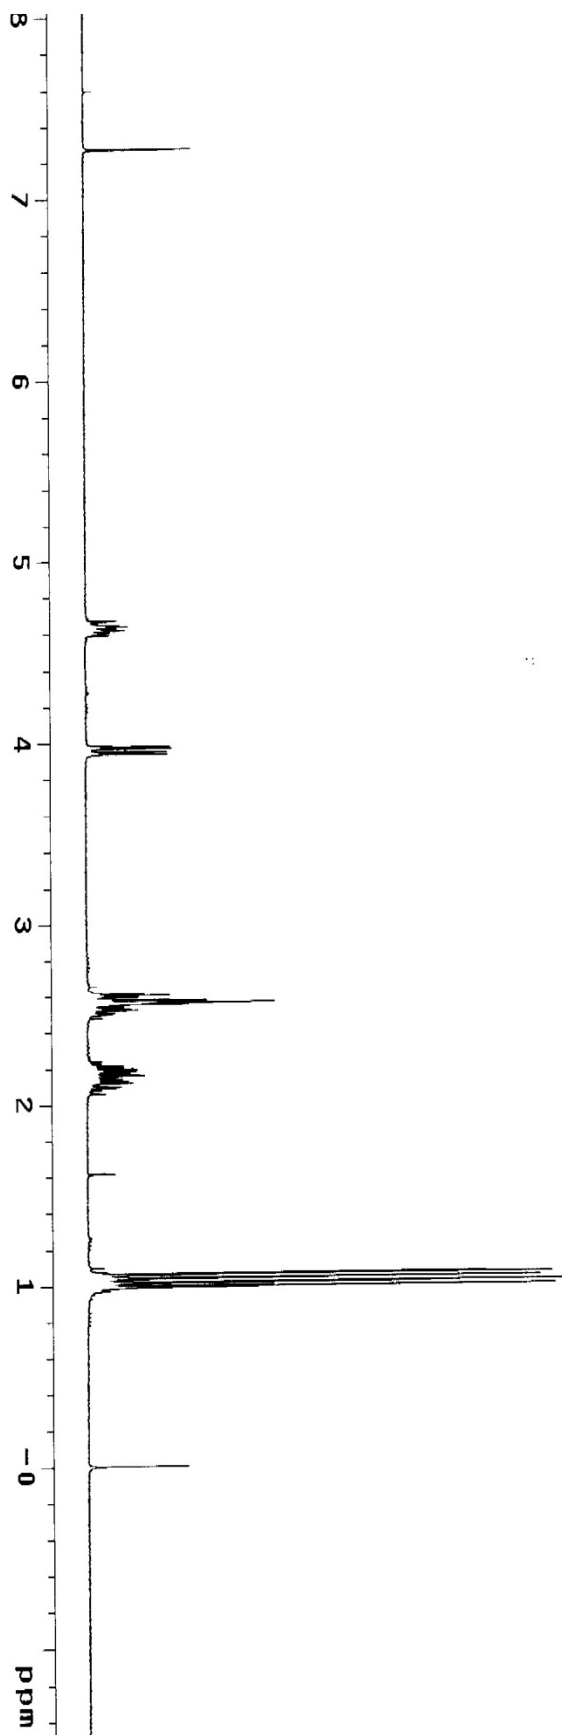

13C OBSERVE

Pulse Sequence: szpu1

Solvent: CDCl3

Ambient temperature

UNITYplus-300 "nmr2"

Relax. delay 2.000 sec

Pulse 38.0 degrees

Acq. time 1.737 sec

Width 18003.9 Hz

732 repetitions

continuously on

WALTZ-16 modulated

Single precision data

DATA PROCESSING

Line broadening 1.0 Hz

FT size 65536

Total time 1 hr, 4 min, 38 sec

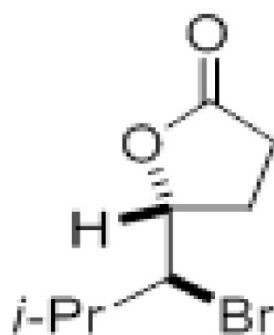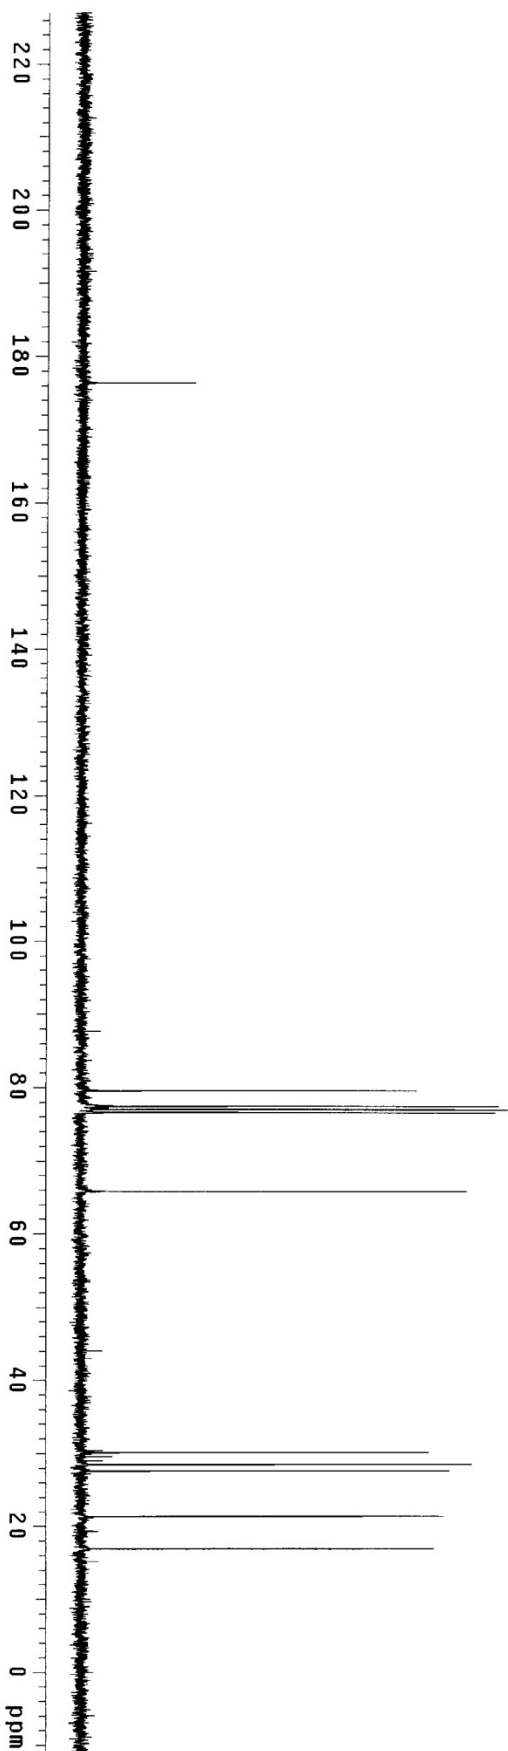

Archive directory:  
Sample directory:

Pulse Sequence: s2pul

Solvent: cdcl3

Ambient temperature

File: 04.DHP.290.s2pul\_H1

INOVA-500 "nmre1roy"

Relax. delay 2.000 sec

Pulse 30.0 degrees

Acq. time 4.000 sec

Width 6410.3 Hz

8 repetitions

OBSERVE H1, 399.8047055 MHz

DATA PROCESSING

FT size 65536

Total time 1 min, 0 sec

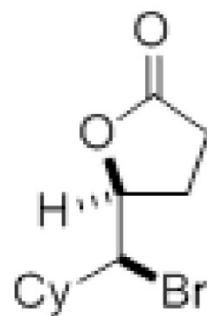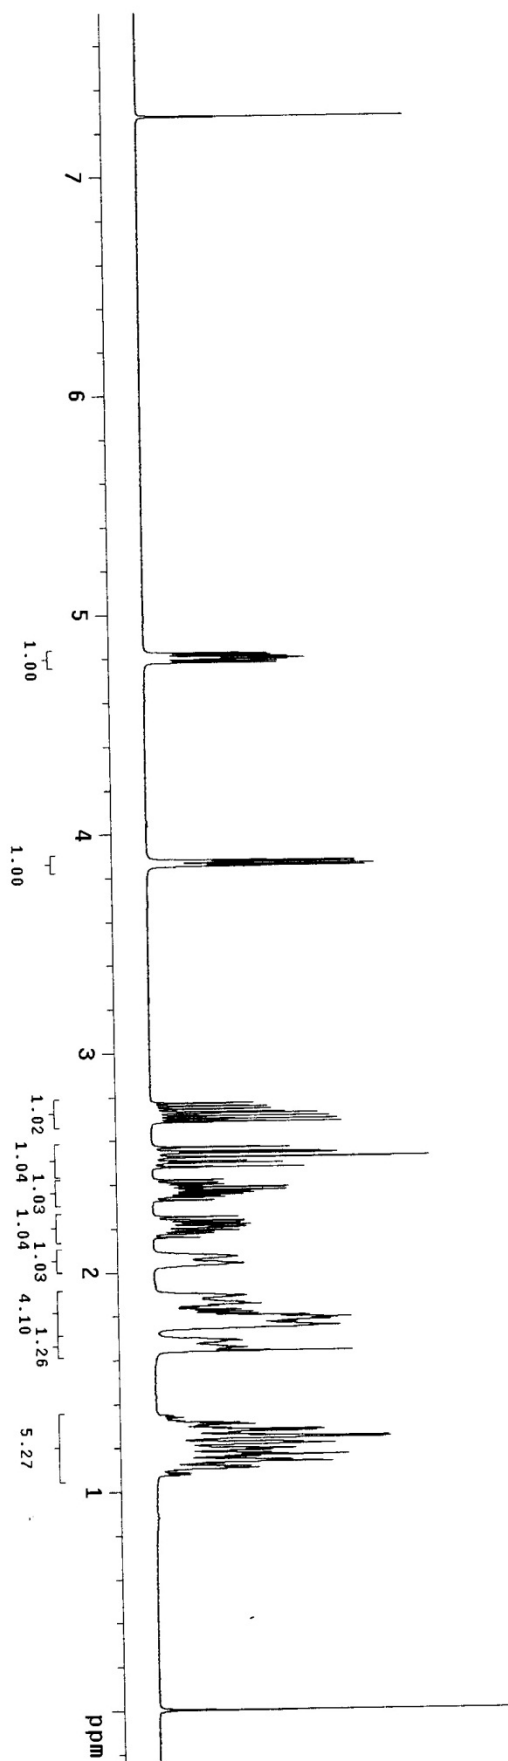

Archive directory:  
Sample directory:

Pulse Sequence: s2pul1  
Solvent: cdcl3  
Ambient temperature  
User: 1-14-87  
File: 04\_DHP\_290\_s2pul1\_C13  
INOVA-500 "nmrelroy"

Relax. delay 2.000 sec  
Pulse 30.0 degrees  
Acq. time 1.300 sec  
Width 23393.8 Hz  
512 repetitions  
OBSERVE C13, 100.5309747 MHz  
DECUPLE H1, 399.8067105 MHz  
Power 44 dB  
continuously on  
WALTZ-16 modulated  
DATA PROCESSING  
FT size 65536  
Total time 28 min, 14 sec

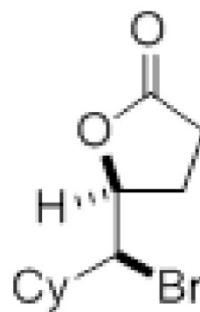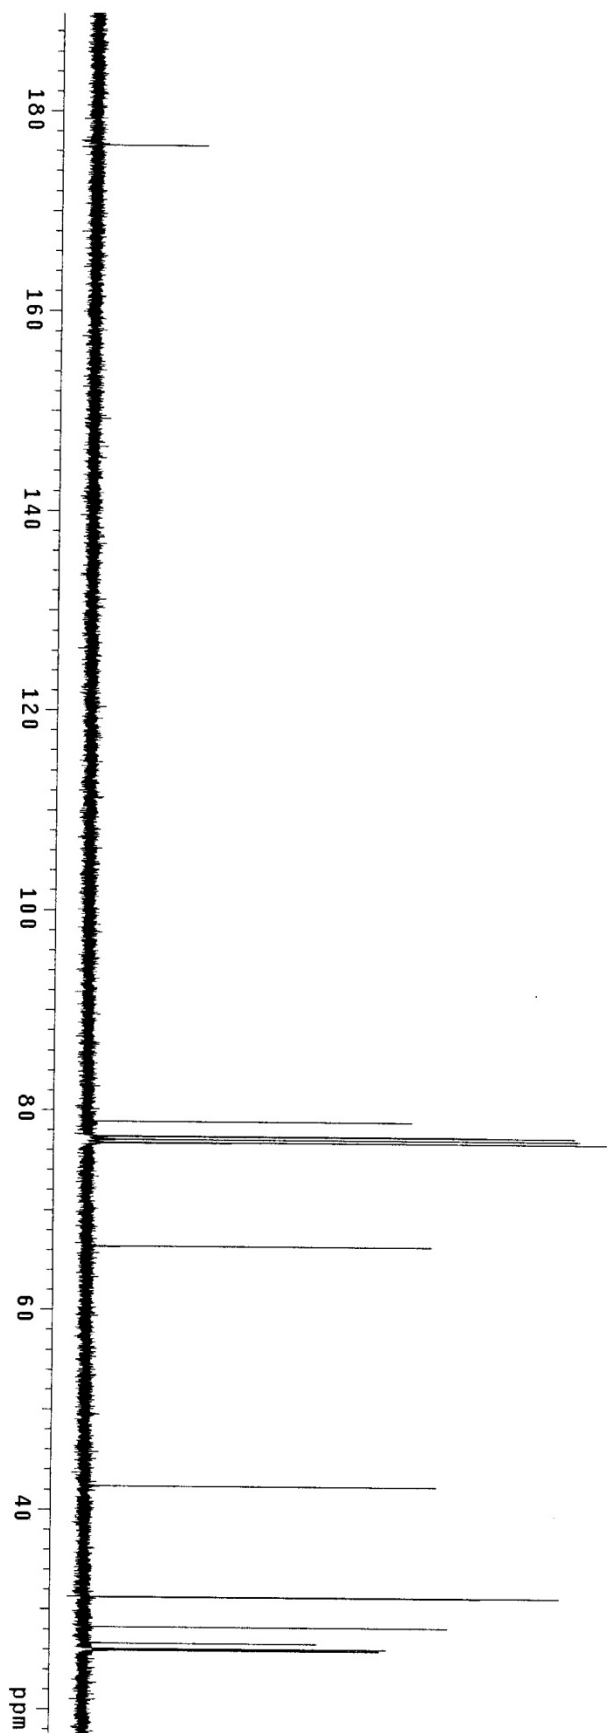

STANDARD 1H OBSERVE

Pulse Sequence: s2pu1  
Solvent: CDCl3  
Ambient temperature  
UNIT: plus-300 °mmr2"

Relax. delay 1.000 sec  
Pulse 15.0 degrees  
Acq. time 3.813 sec  
Width 4196.4 Hz  
8 repetitions  
OBSERVE H1 300.1390267 MHz  
DATA PROCESSING  
Line broadening 0.1 Hz  
FT size 32768  
Total time 0 min, 38 sec

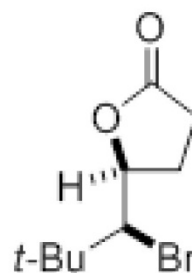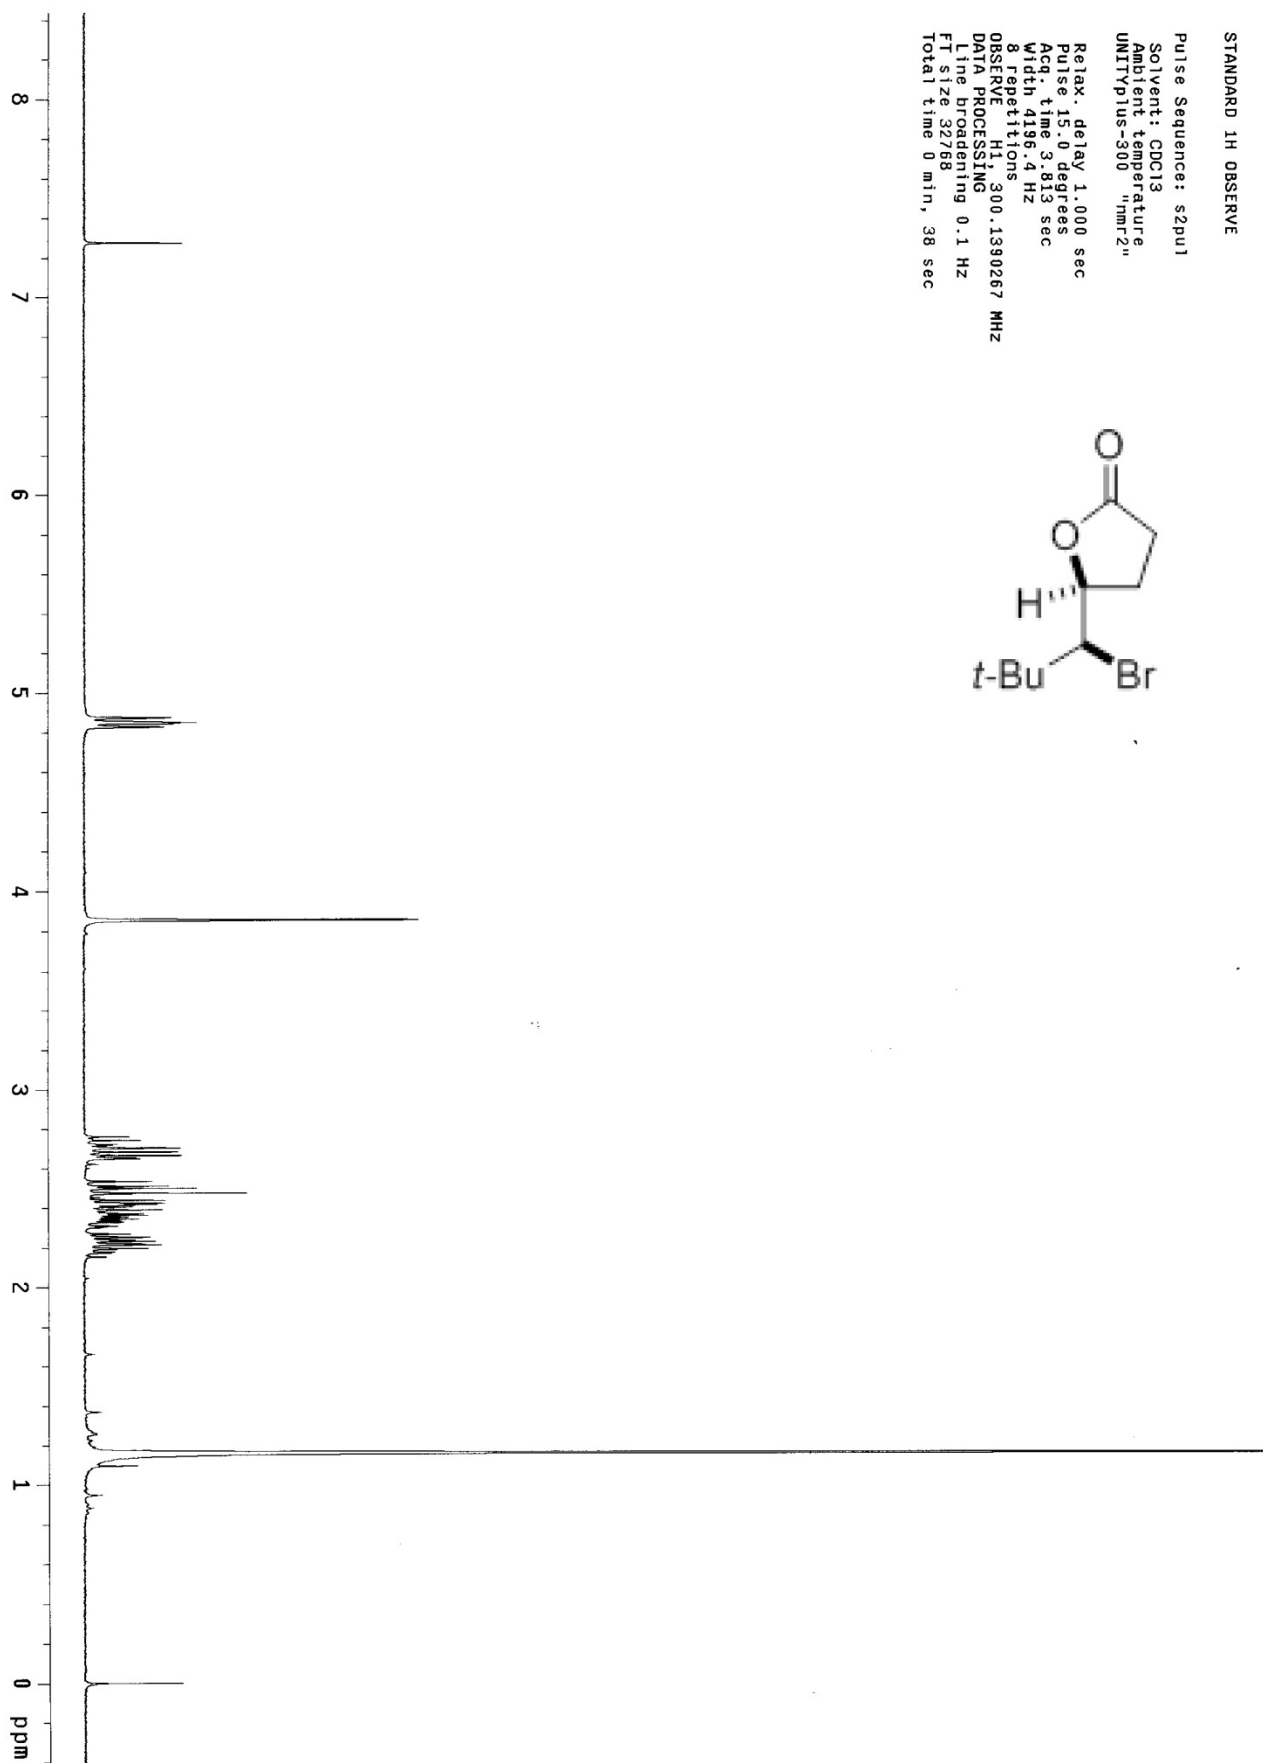

13C OBSERVE

Pulse Sequence: s2pul  
Solvent: CDCl<sub>3</sub>  
Ambient temperature  
UNITYplus-300 "nmr2"

Relax. delay 2.000 sec  
Pulse 36.0 degrees  
Acq. time 1.777 sec  
Width 18009.9 Hz  
292 repetitions  
OBSERVE C13, 75.4700222 MHz  
DECOUPLE H1, 300.1409259 MHz  
Power 40 dB  
continuously on  
WALTZ-16 modulated  
Single precision data  
DATA PROCESSING  
Line broadening 1.0 Hz  
F1 size 65536  
Total time 1 hr, 4 min, 38 sec

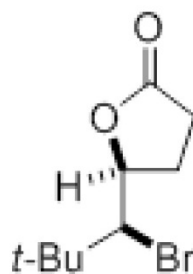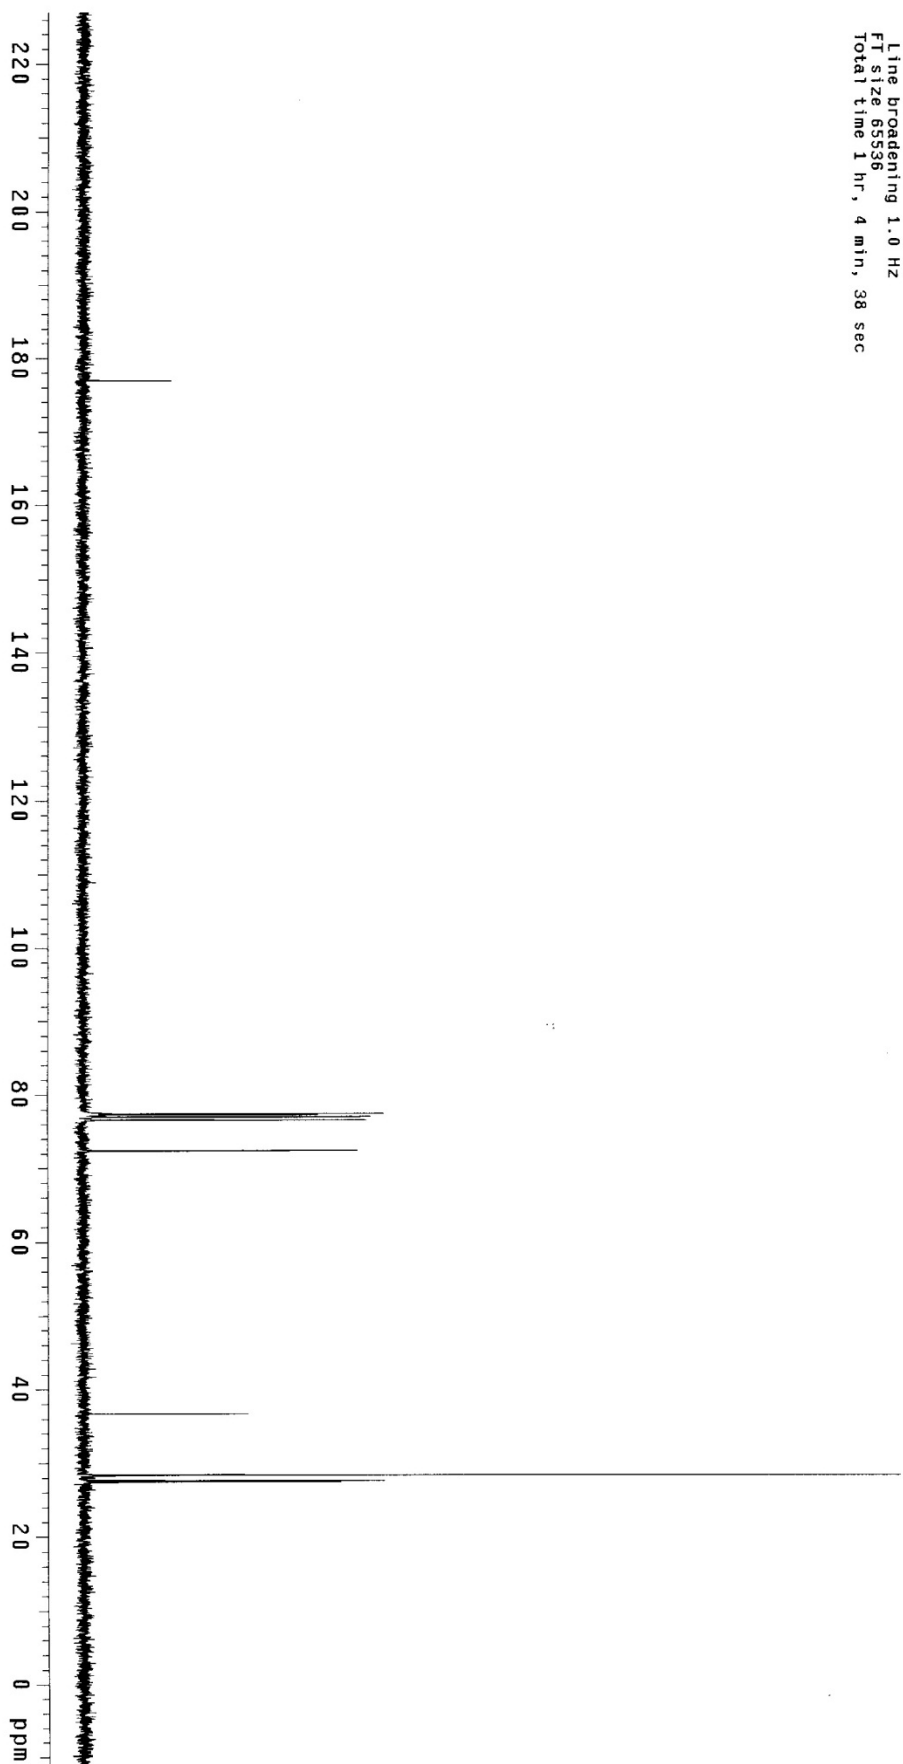

STANDARD 1H OBSERVE

Pulse Sequence: s2pul  
Solvent: CDCl3  
Ambient temperature  
Mercury-40088 "nmr6"

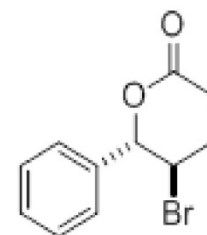

Relax. delay 2.000 sec  
Pulse 16.4 degrees  
Acq. time 2.836 sec  
Width 3642.1 Hz  
64 repetitions  
OBSERVE H1 400.266784 MHz  
DATA PROCESSING  
Line broadening 0.1 Hz  
F1 size 32768  
Total time 0 min, 0 sec

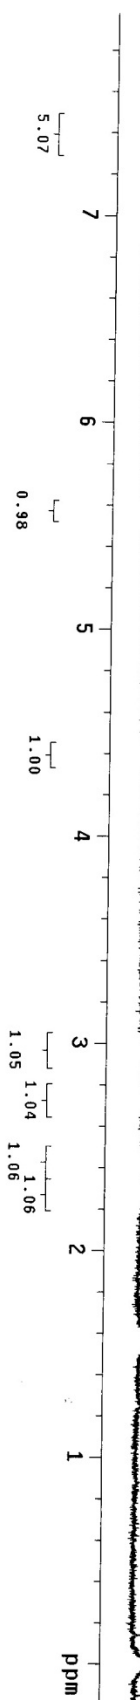

STANDARD 1H OBSERVE

Pulse Sequence: s2pul  
Solvent: CDCl3  
Ambient temperature  
Mercury-400BB "nmr6"

Relax. delay 2.000 sec  
Pulse 16.4 degrees  
Acq. time 2.856 sec  
Width 5602.2 Hz  
16 repetitions  
OBSERVE H1; 400.2669778 MHz  
DATA PROCESSING  
Line broadening 0.1 Hz  
FT size 32768  
Total time 1 min, 20 sec

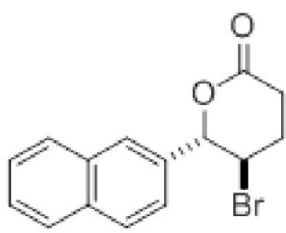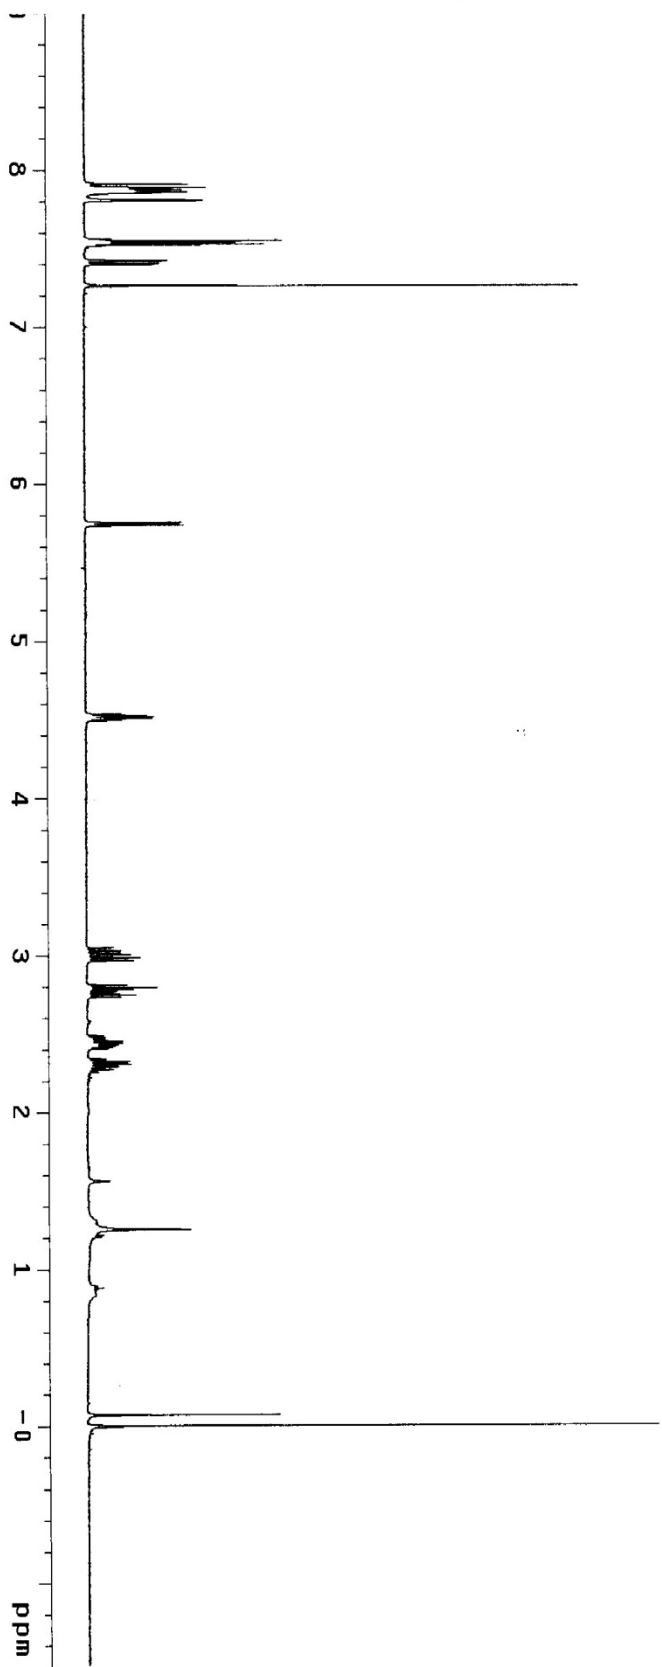

STANDARD 1H OBSERVE

Pulse Sequence: szpul  
Solvent: CDCl3  
Ambient temperature  
Mercury-400DB "nmr6"  
Relax. delay 2.000 sec  
Pulse 15.4 degrees  
Acq. time 2.856 sec  
Width 5602.2 Hz  
8 repetitions  
OBSERVE: H1, 400.2669750 MHz  
DATA PROCESSING  
Line broadening 0.1 Hz  
FT size 32768  
Total time 0 min, 41 sec

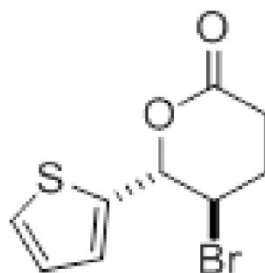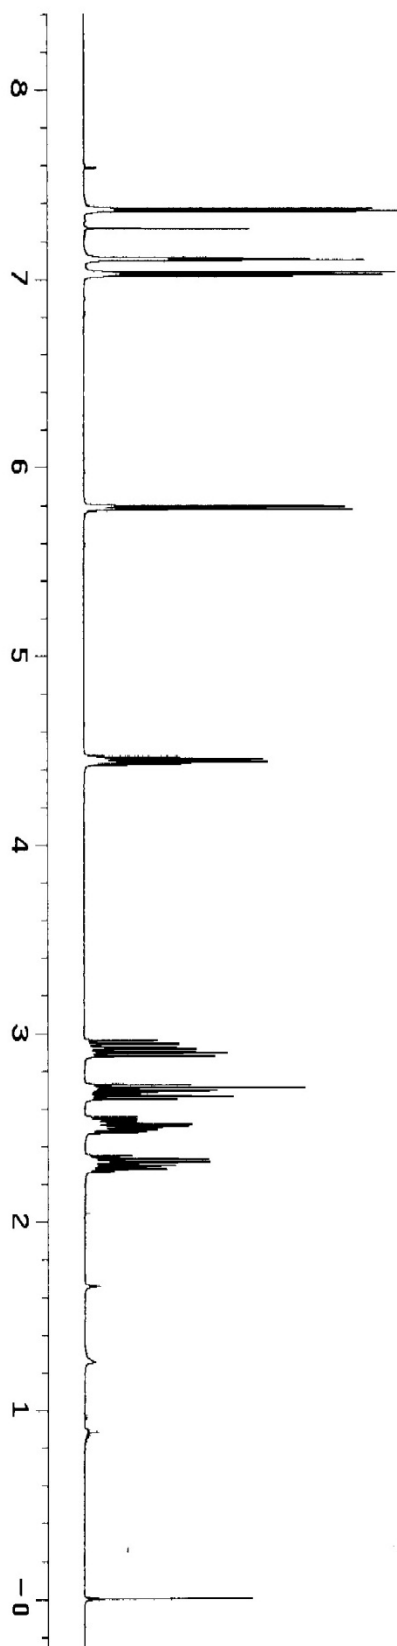

STANDARD 1H OBSERVE

Pulse Sequence: s2pu1

Solvent: CDCl3

Ambient temperature

UNITYplus-300 "nmr2"

Relax. delay 1.000 sec

Pulse 15.0 degrees

Acq. time 3.813 sec

Width 4196.4 Hz

16 Repetitions

OBSERVE H1: 300.1390303 MHz

DATA PROCESSING

Line broadening 0.1 Hz

FT size 32768

Total time 1 min, 17 sec

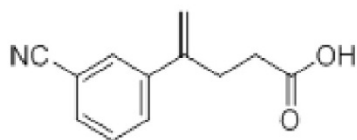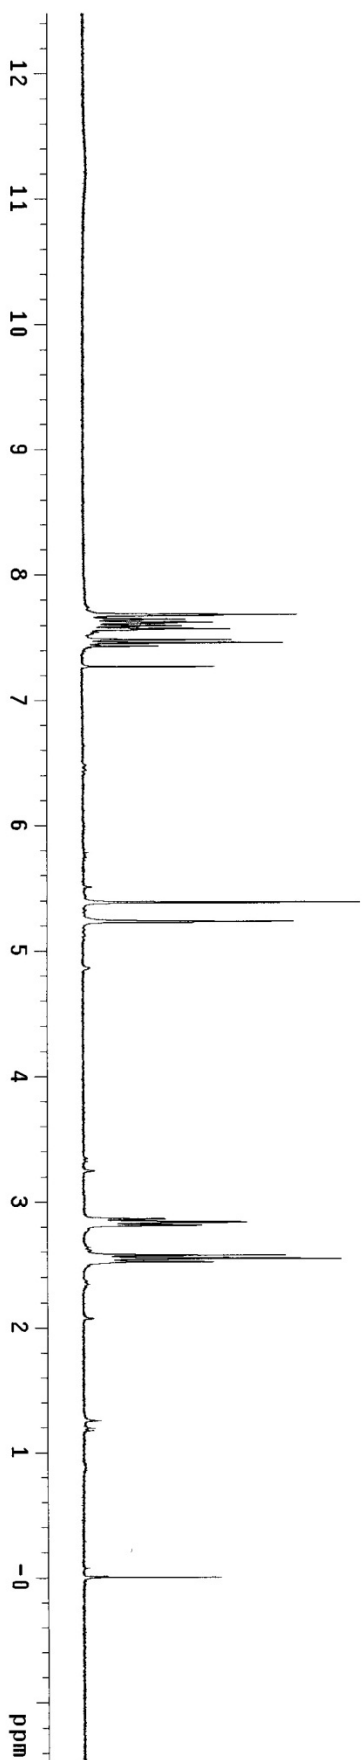

13C OBSERVE

Pulse Sequence: szpu1

Solvent: CDCl3

Ambient temperature

UNITYplus-300 "nmr2"

Relax. delay 2.000 sec

Pulse 36.0 degrees

Acq. time 1.777 sec

Width 18098.9 Hz

383 repetitions

OBSERVE G13, 75.4700205 MHz

DECOUPLE H1, 300.1409259 MHz

Power 40 dB

continuously on

WALTZ-16 modulated

Single precision data

DATA PROCESSING

Line broadening 1.0 Hz

FT size 65536

Total time 1 hr, 4 min, 38 sec

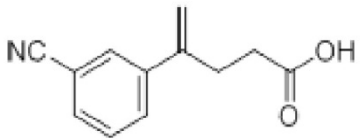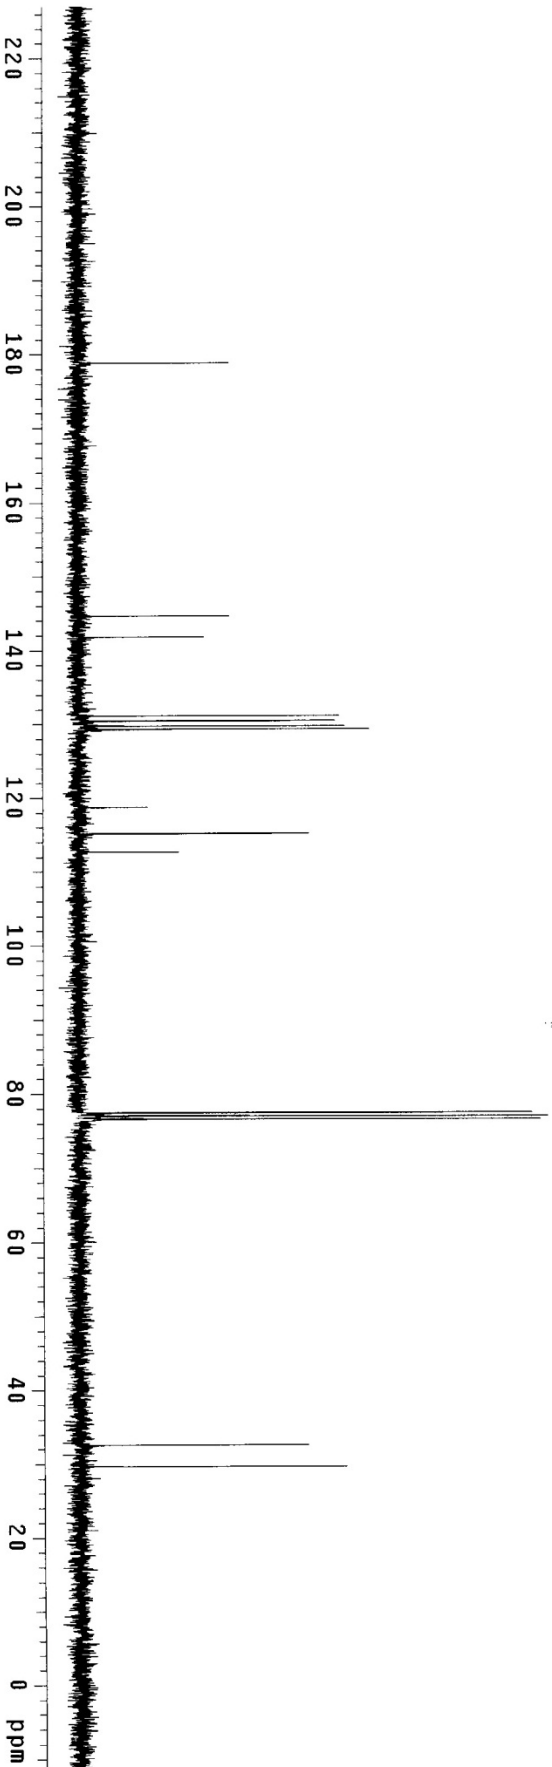

STANDARD 1H OBSERVE

Pulse Sequence: s2pu1

Solvent: CDCl3

Ambient temperature

UNITYplus-300 "nmr2"

Relax. delay 1.000 sec

Pulse 15.0 degrees

Acq. time 3.813 sec

Width 4196.4 Hz

16 repetitions

OBSERVE H1, 300.1390308 MHz

DATA PROCESSING

Line broadening 0.1 Hz

FT size 32768

Total time 1 min, 17 sec

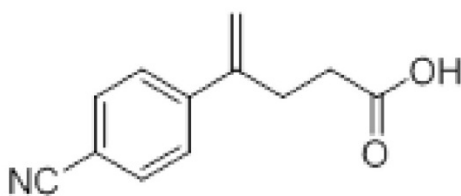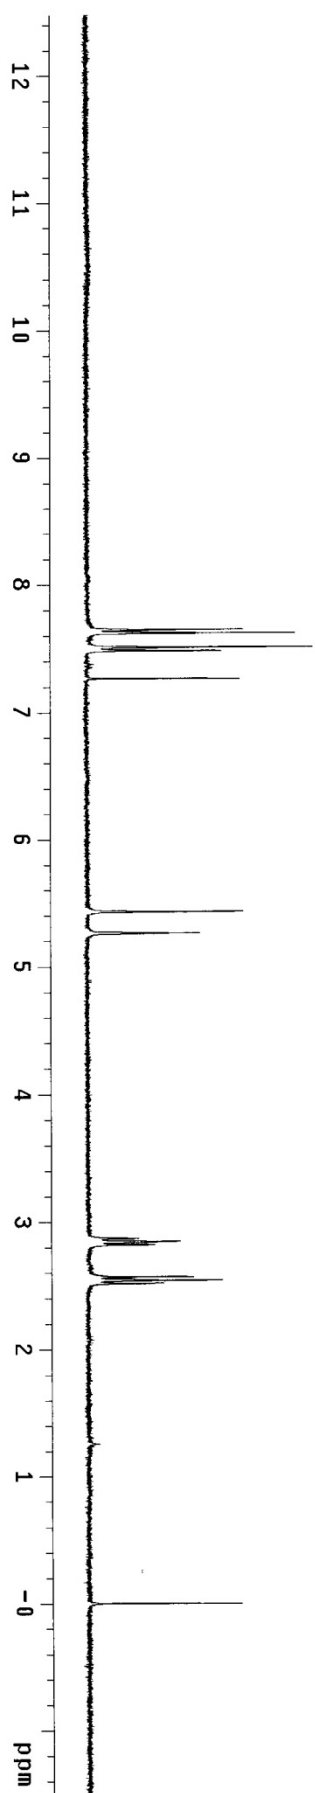

13C OBSERVE

Pulse Sequence: szpul

Solvent: CDCl3

Ambient temperature

UNITYplus-300 "nmr2"

Relax. delay 2.000 sec

Pulse 36.0 degrees

Acq. time 1.777 sec

Width 16009.9 Hz

370 repetitions

OBSERVE C13, 75.4700200 MHz

DECOUPLE H1, 300.1409259 MHz

Power 40 dB

continuously on

WALTZ-16 modulated

Single precision data

DATA PROCESSING

Line broadening 1.0 Hz

FI size 65536

Total time 32 min, 19 sec

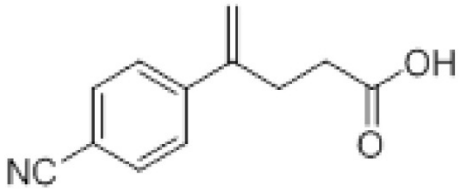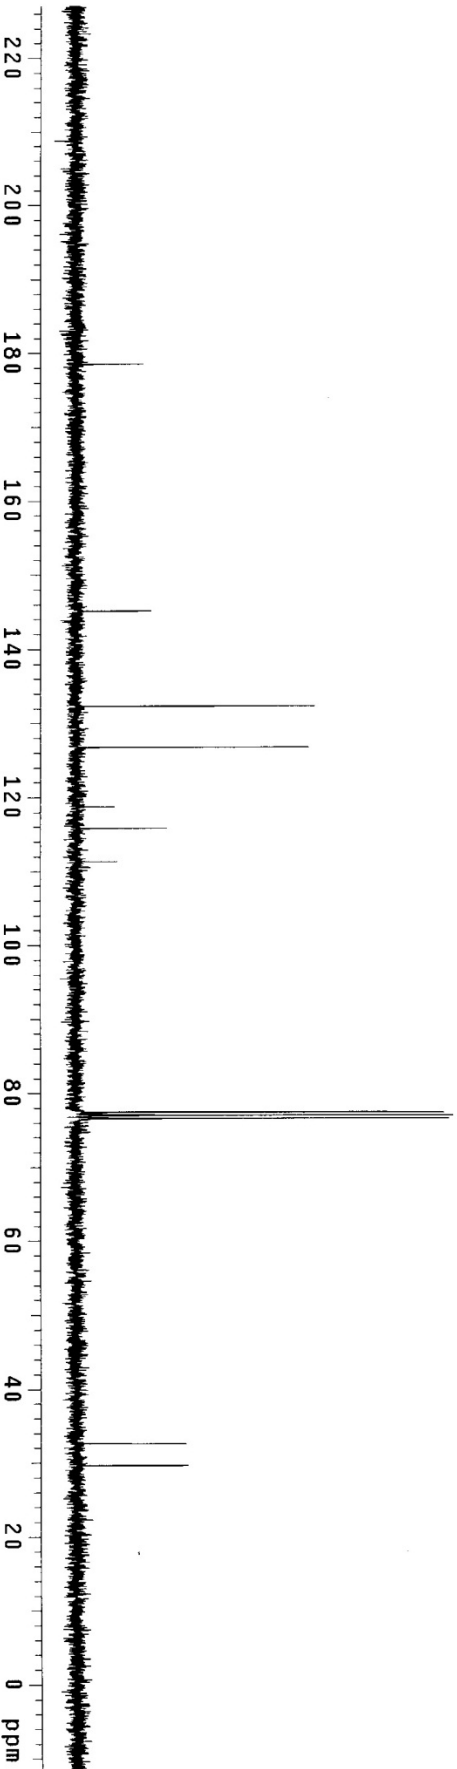

Archive directory:  
Sample directory:  
Pulse Sequence: s2pu1  
Solvent: cdcl3  
Ambient temperature  
File: 04.DHP.293.s2pu1\_H1  
INOVA-500 "nmref1oy"  
Relax. delay 2.000 sec  
Pulse 30.0 degrees  
Acq. time 4.000 sec  
Width 6410.3 Hz  
8 repetitions  
OBSERVE H1, 399.8047092 MHz  
DATA PROCESSING  
FT size 65536  
Total time 1 min, 0 sec

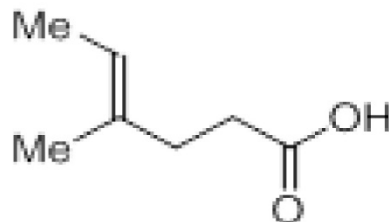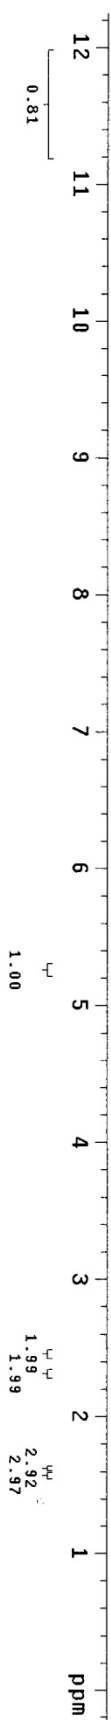

Archive directory:  
Sample directory:

Pulse Sequence: s2pu1  
Solvent: cdcl3  
Ambient temperature  
User: 1-14-87  
File: 04 DHP\_293\_s2pu1\_C13  
INOVA-500 "nmr1roy"

Relax. delay 2.000 sec  
Pulse 30.0 degrees  
Acq. time 1.300 sec  
Width 24509.8 Hz  
512 repetitions  
OBSERVE C13, 100.5309747 MHz  
DECOUPLE H1, 399.8067105 MHz  
Power 44 dB  
continuously on  
WALTZ-16 modulated  
DATA PROCESSING  
FT size 65536  
Total time 28 min, 14 sec

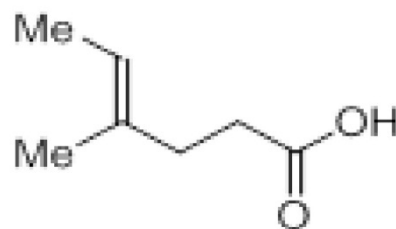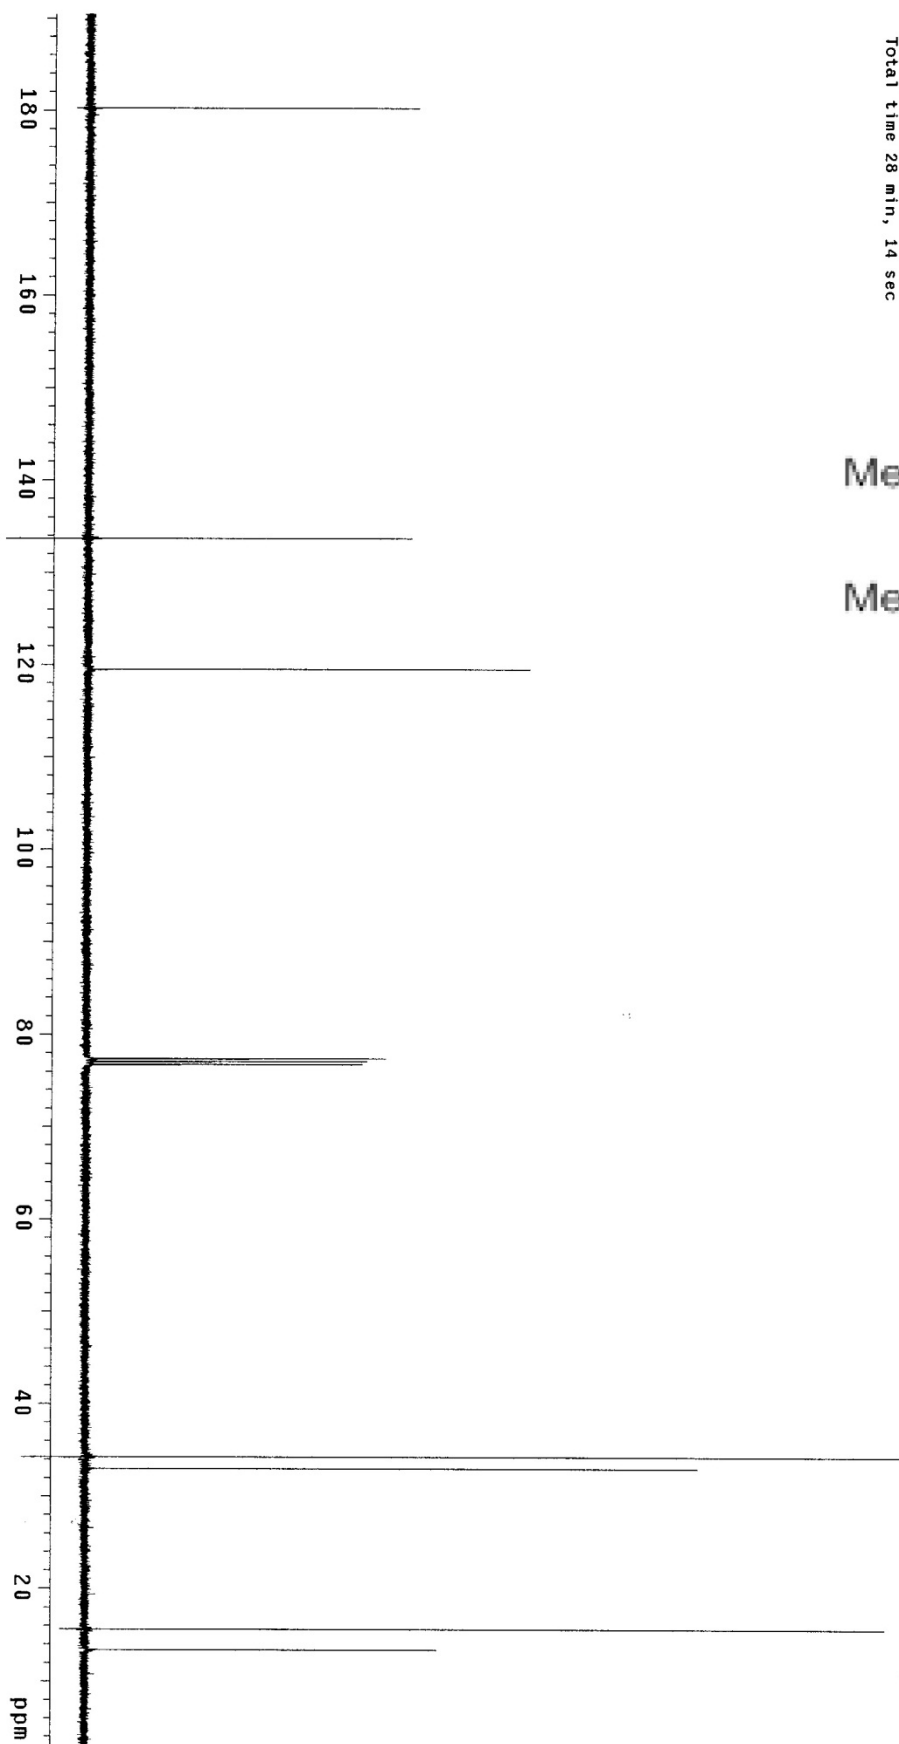

Archive directory:  
Sample directory:

Pulse Sequence: s2pul

Solvent: cdcl3  
Ambient temperature  
File: 04.DHP\_294\_s2pul\_H1  
INOVA-500 "nmrefroy"

Relax. delay 2.000 sec  
Pulse 30.0 degrees  
Acq. time 4.000 sec  
Width 6410.3 Hz  
8 repetitions  
OBSERVE H1, 399.8047063 MHz  
DATA PROCESSING  
FI size 65536  
Total time 1 min, 0 sec

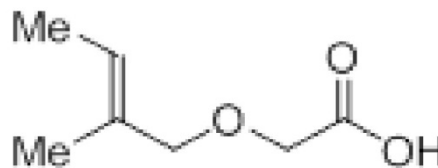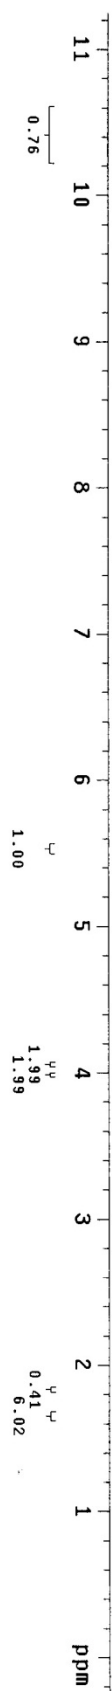

Archive directory:  
Sample directory:

Pulse Sequence: szpul

Solvent: cdcl3

Ambient temperature

User: 1-14-87

File: 04\_OHP\_294-s2pul\_C13

INOVA-500 "nmreloy"

Relax. delay 2.000 sec

Pulse 30.0 degrees

Acq. time 1.300 sec

Width 2450.8 Hz

512 Repetitions

OBSERVE C13, 100.5309747 MHz

DECOUPLE H1, 399.8067105 MHz

Power 44 dB

Continuously on

WALTZ-16 modulated

DATA PROCESSING

FT size 65536

Total time 28 min, 14 sec

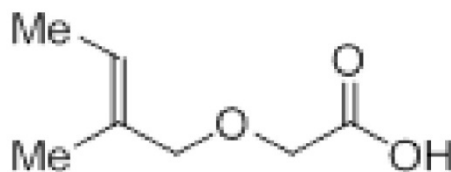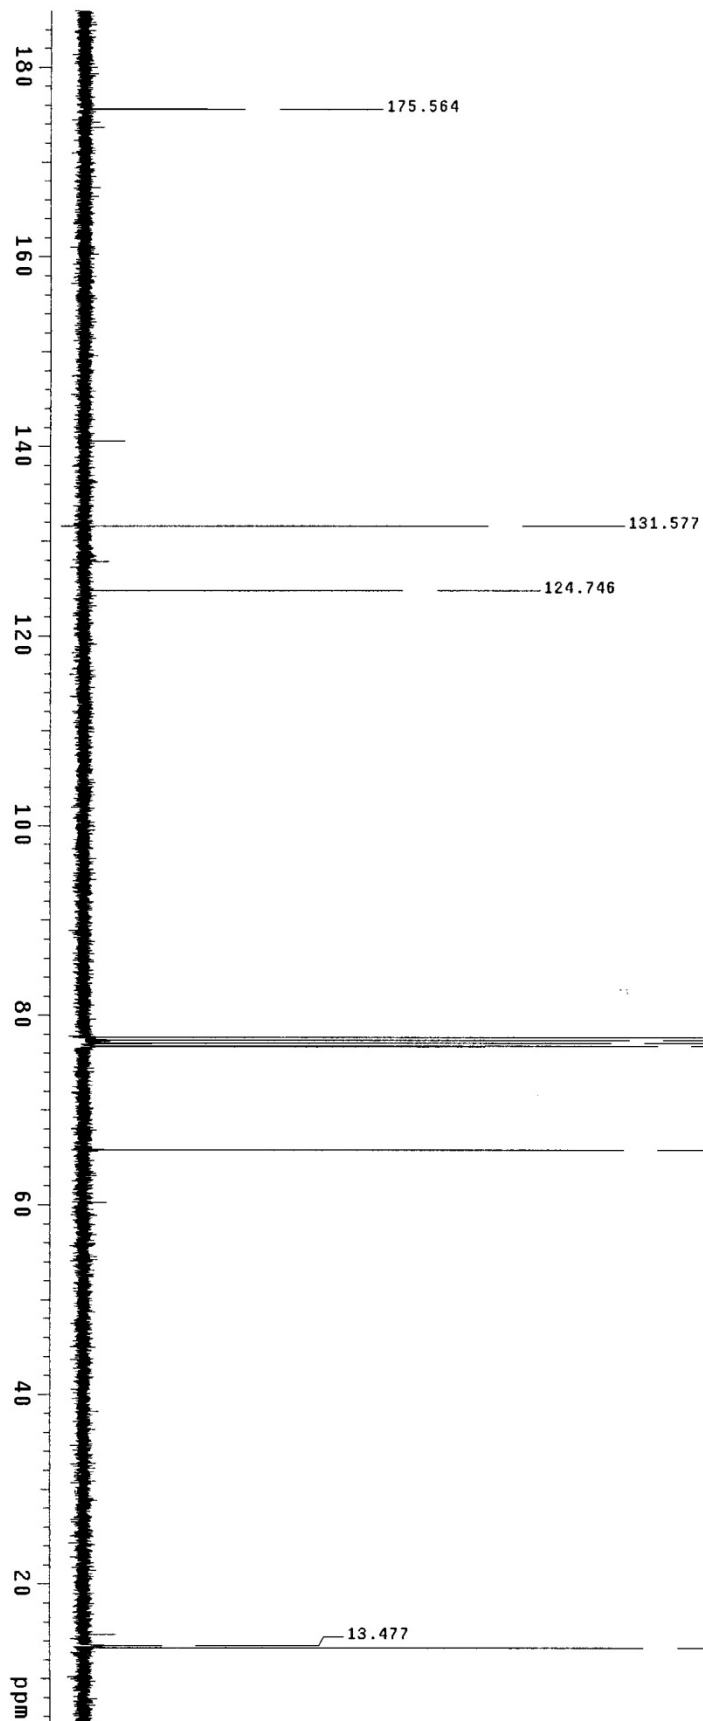

STANDARD 1H OBSERVE

Pulse Sequence: szpul  
Solvent: CDCl3  
Ambient temperature  
UNITYplus-300 "nmr2"  
  
Relax. delay 1.000 sec  
Pulse 15.0 degrees  
Acq. time 3.813 sec  
Width 4196.4 Hz  
16 repetitions  
OBSERVE H1, 300.1390311 MHz  
DATA PROCESSING  
Line broadening 0.1 Hz  
Ft size 32768  
Total time 1 min, 17 sec

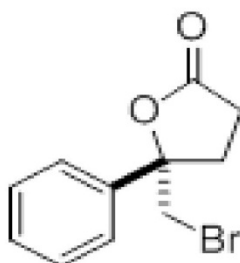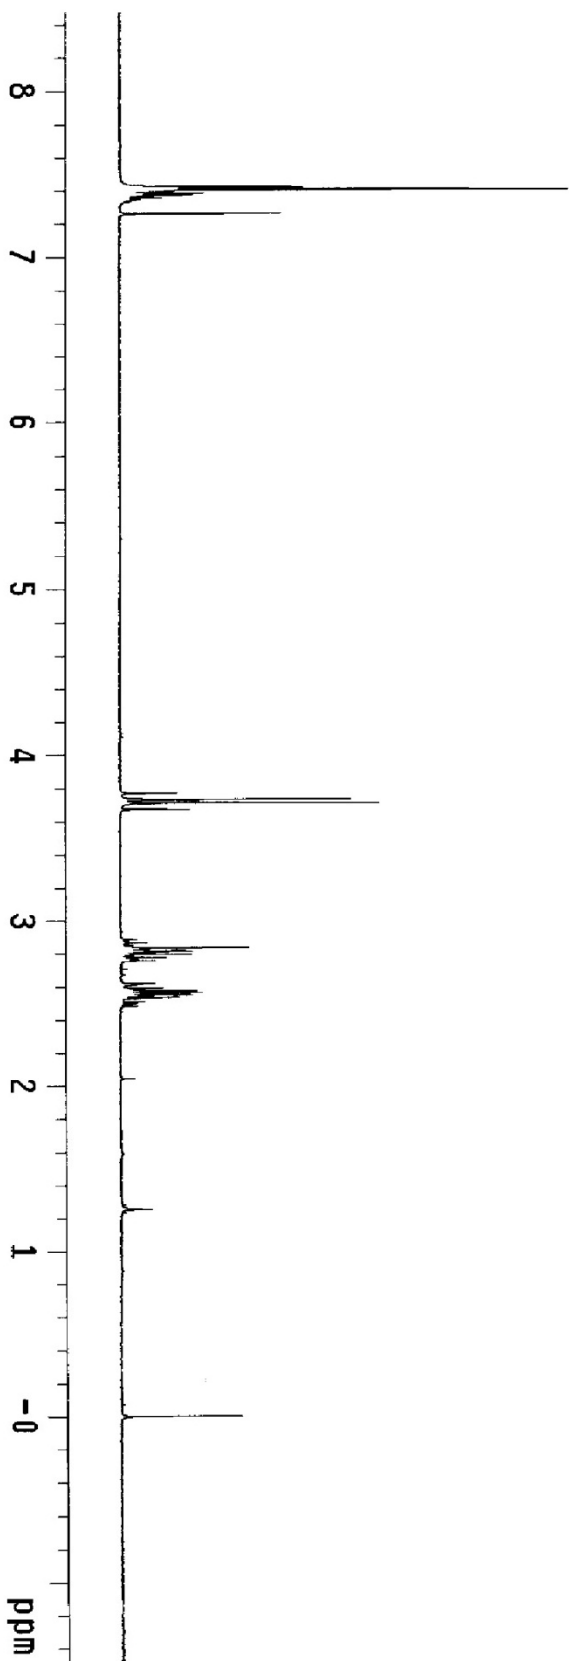

STANDARD 1H OBSERVE

Pulse Sequence: s2pu1  
 Solvent: CDCl3  
 Ambient temperature  
 UNITYplus-300 "nmr2"  
 Relax. delay 1.000 sec  
 Pulse 15.0 degrees  
 Acq. time 3.813 sec  
 Width 4196.4 Hz  
 16 repetitions  
 OBSERVE H1, 300.1390277 MHz  
 DATA PROCESSING  
 Line broadening 0.1 Hz  
 FI size 32768  
 Total time 1 min, 17 sec

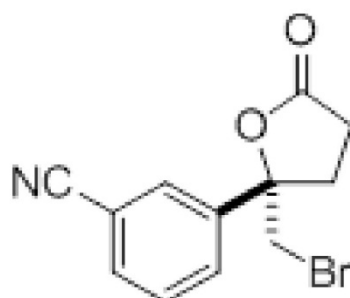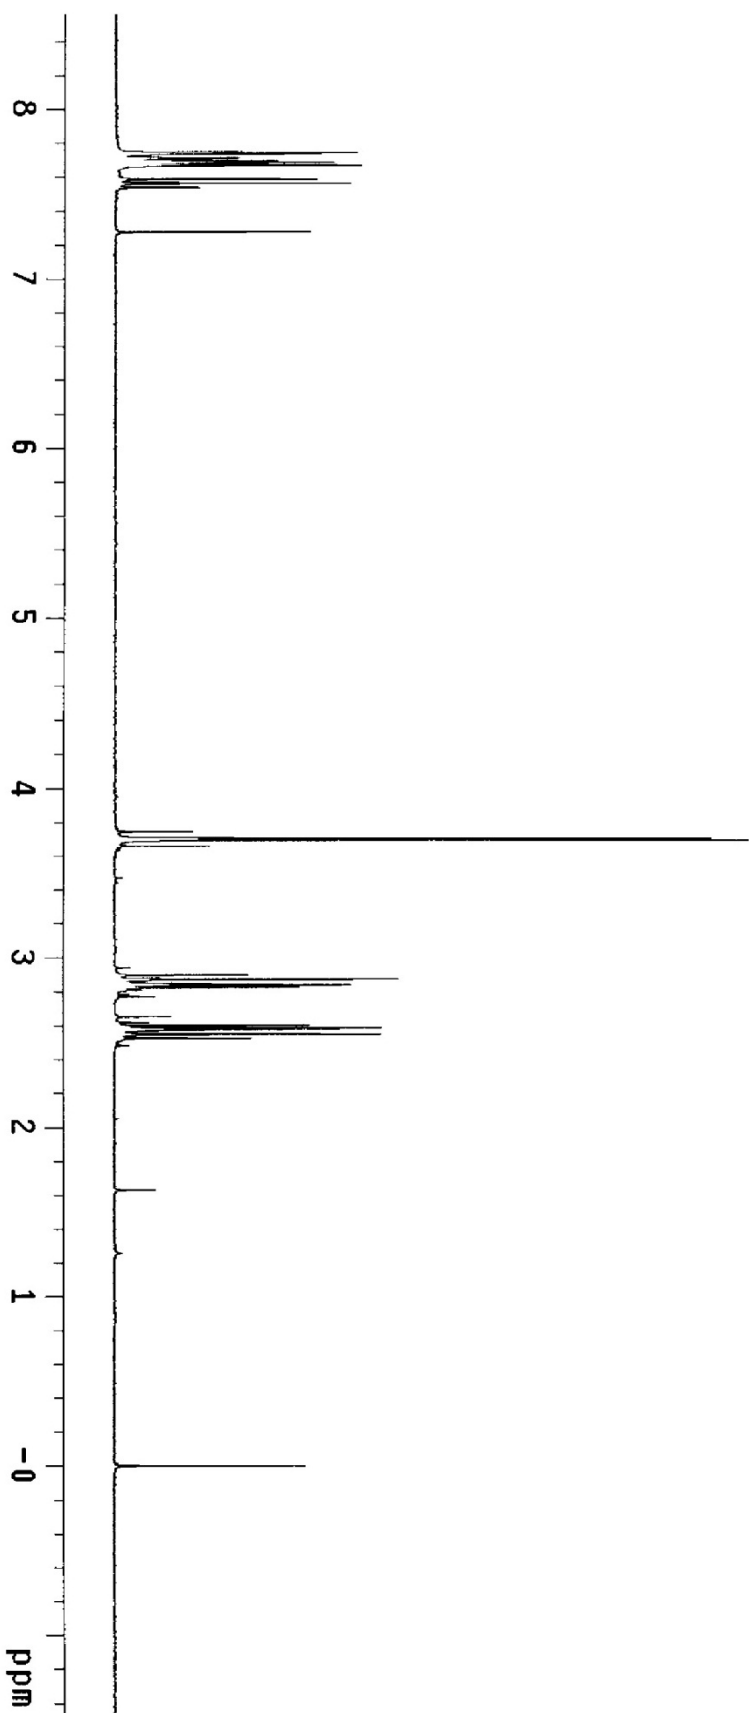

13C OBSERVE

Pulse Sequence: s2pul1

Solvent: CDCl3  
Ambient temperature  
UNITYplus-300 "nmr2"

Relax. delay 2.000 sec  
Pulse 38.0 degrees  
Acq. time 1.777 sec  
Width 18093.9 Hz  
409 repetitions  
OBSERVE C13, 75.4700227 MHz  
DECOUPLE H1, 300.1409259 MHz  
Power 40 db  
continuously on  
WALTZ-16 modulated  
Single precision data  
DATA PROCESSING  
Line broadening 1.0 Hz  
FT size 65536  
Total time 32 min, 19 sec

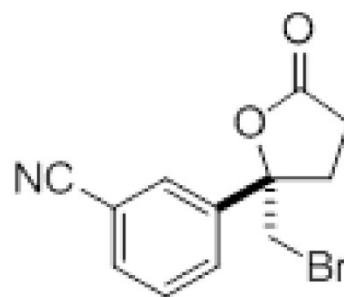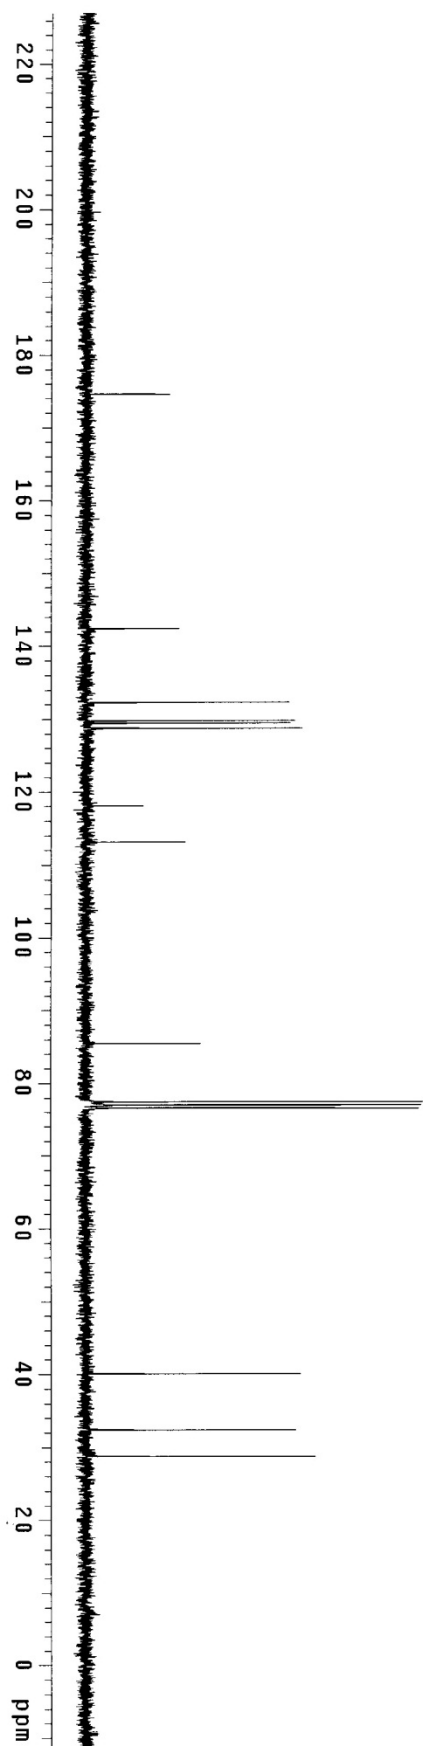

STANDARD 1H OBSERVE

Pulse Sequence: s2pul  
Solvent: CDCl3  
Ambient temperature  
UNIT: plus-300 "nmr2"  
  
Relax. delay 1.000 sec  
Pulse 15.0 degrees  
Acq. time 3.813 sec  
Width 4196.4 Hz  
8 repetitions  
OBSERVE H1, 300.1390285 MHz  
DATA PROCESSING  
Line broadening 0.1 Hz  
FT size 32768  
Total time 0 min, 38 sec

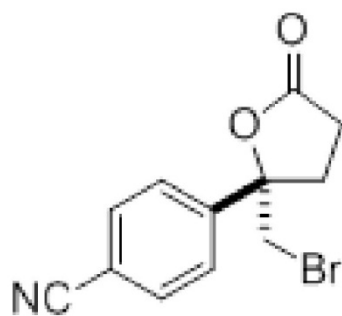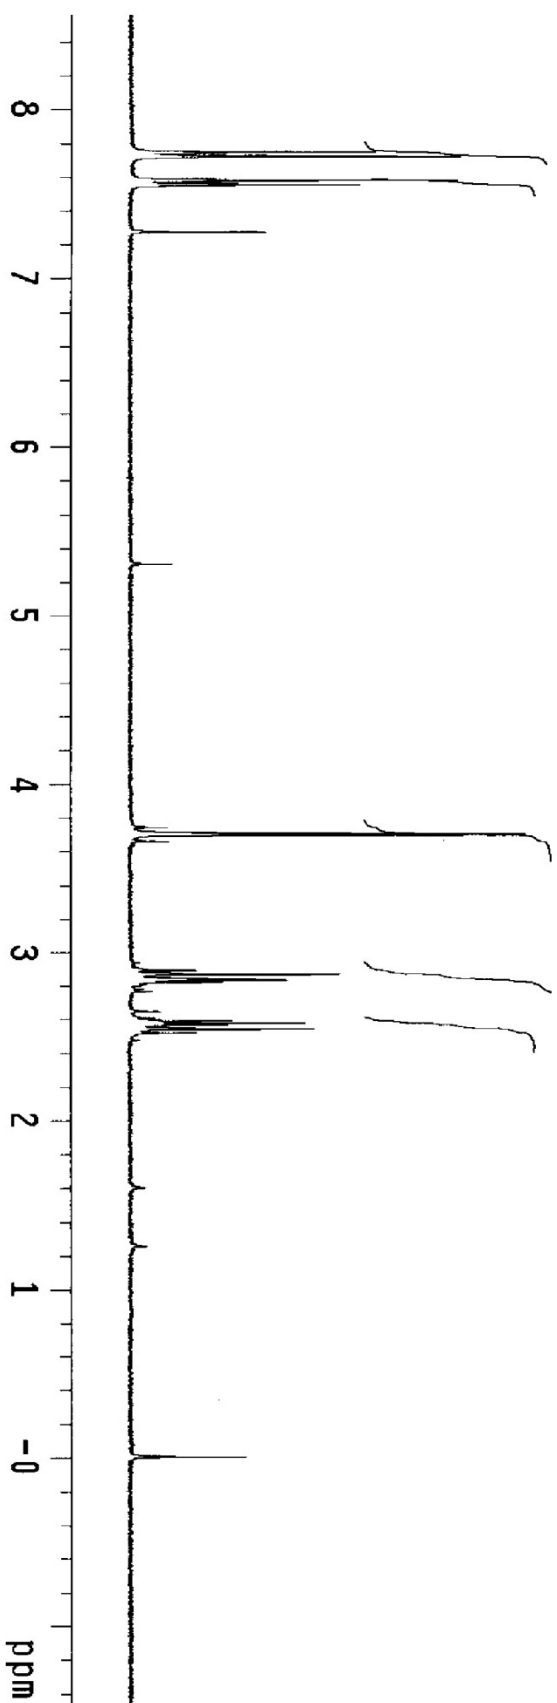

Pulse Sequence: szpul  
Solvent: CDCl<sub>3</sub>  
Ambient temperature  
UNITYplus-300 "nmr2"

Relax. delay 2.000 sec  
Pulse 36.0 degrees  
Acq. time 1.777 sec  
Width 18009.9 Hz  
424 repetitions  
OBSERVE C13, 75.4700211 MHz  
DECUPLE H1, 300.1409259 MHz  
Power 40 dB  
continuously on  
WALTZ-16 modulated  
Single precision data  
DATA PROCESSING  
Line broadening 1.0 Hz  
FI size 65536  
Total time 1 hr, 4 min, 38 sec

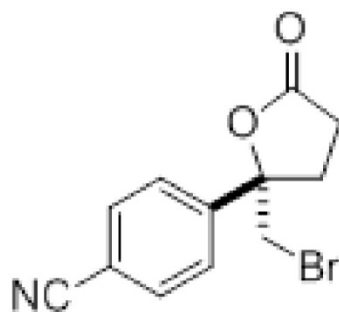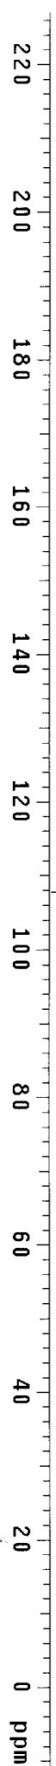

## STANDARD 1H OBSERVE

Pulse Sequence: s2pu1  
Solvent: CDCl3  
Ambient temperature  
UNITYplus-300 "nmr2"

Relax. delay 1.000 sec  
Pulse 15.0 degrees  
Acq. time 3.813 sec  
Width 4196.4 Hz  
16 repetitions  
OBSERVE H1: 300.1390247 MHz  
DATA PROCESSING  
Line broadening 0.1 Hz  
FT size 32768  
Total time 1 min, 17 sec

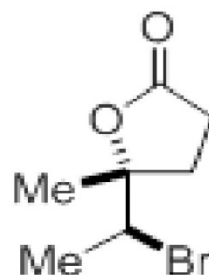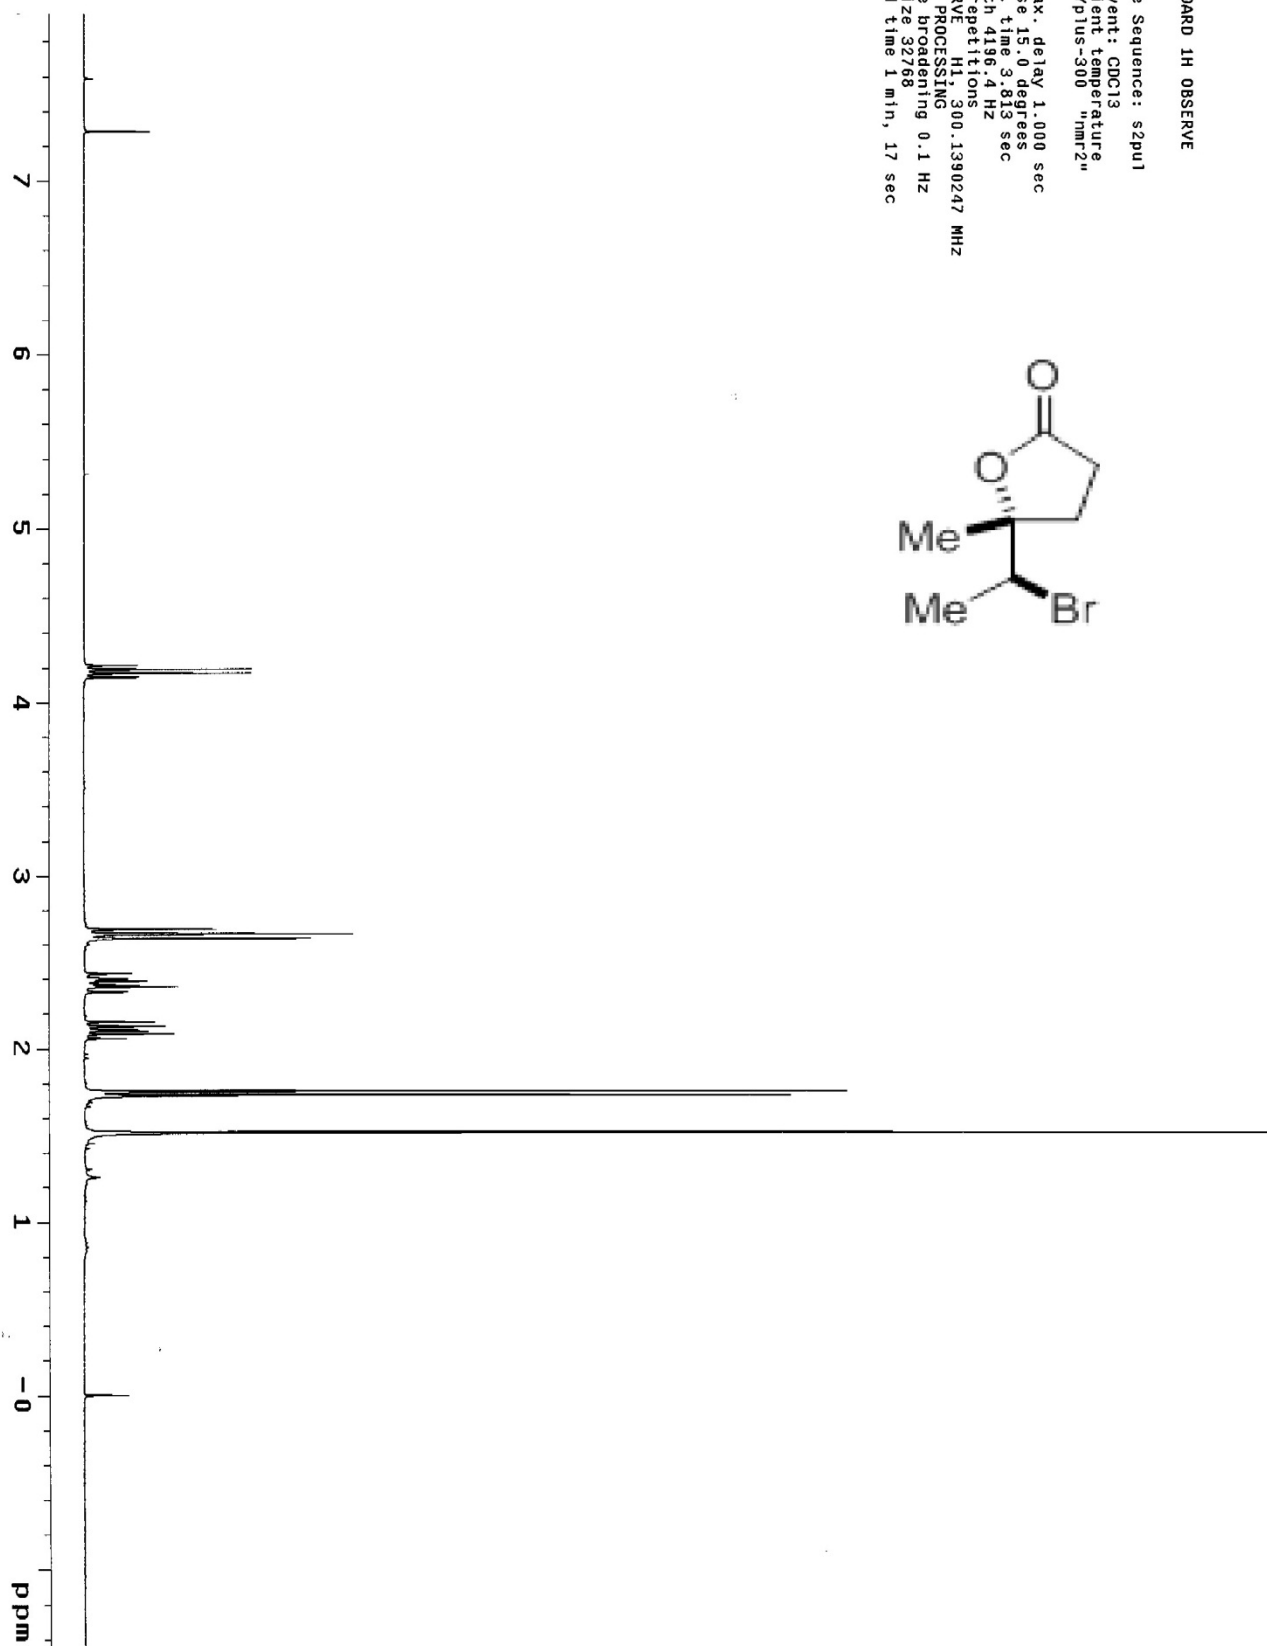

<sup>13</sup>C OBSERVE

Pulse Sequence: s2pu1  
Solvent: CDCl<sub>3</sub>  
Ambient temperature  
UNITplus-300 "nmr2"

Relax. delay 2.000 sec  
Pulse 36.0 degrees  
Acq. time 1.777 sec  
Width 18009.9 Hz  
84 repetitions  
OBSERVE C13, 75.4700233 MHz  
DECOUPLE H1, 300.1409259 MHz  
Power 40 dB  
continuously on  
WALTZ-16 modulated  
Single precision data  
DATA PROCESSING  
Line broadening 1.0 Hz  
FT size 65536  
Total time 1 hr, 4 min, 38 sec

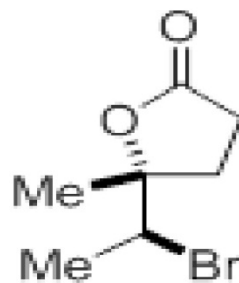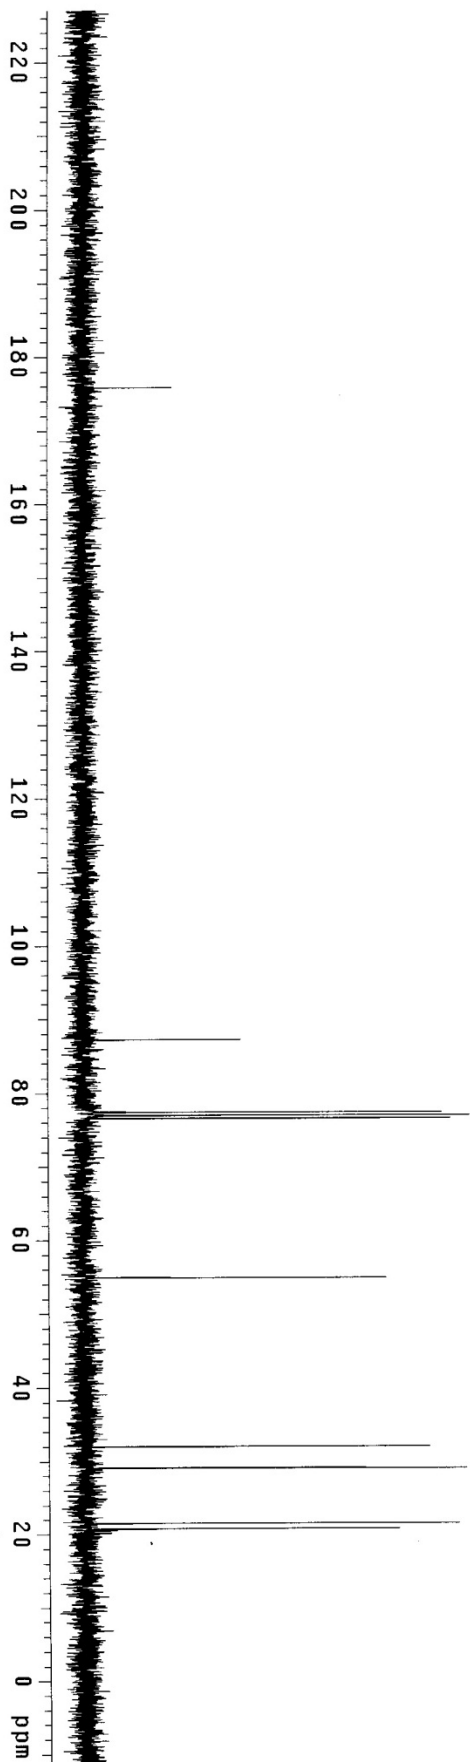

## STANDARD 1H OBSERVE

Pulse Sequence: s2pu1  
Solvent: CDCl3  
Ambient temperature  
Mercury-400DB "nmr8"  
Relax. delay 2.000 sec  
Pulse 16.4 degrees  
Acq. time 2.856 sec  
Width 5602.2 Hz  
16 repetitions  
OBSERVE H1, 400.2669774 MHz  
DATA PROCESSING  
Line broadening 0.1 Hz  
FT size 32768  
Total time 1 min, 20 sec

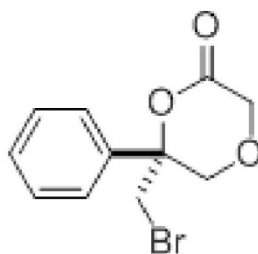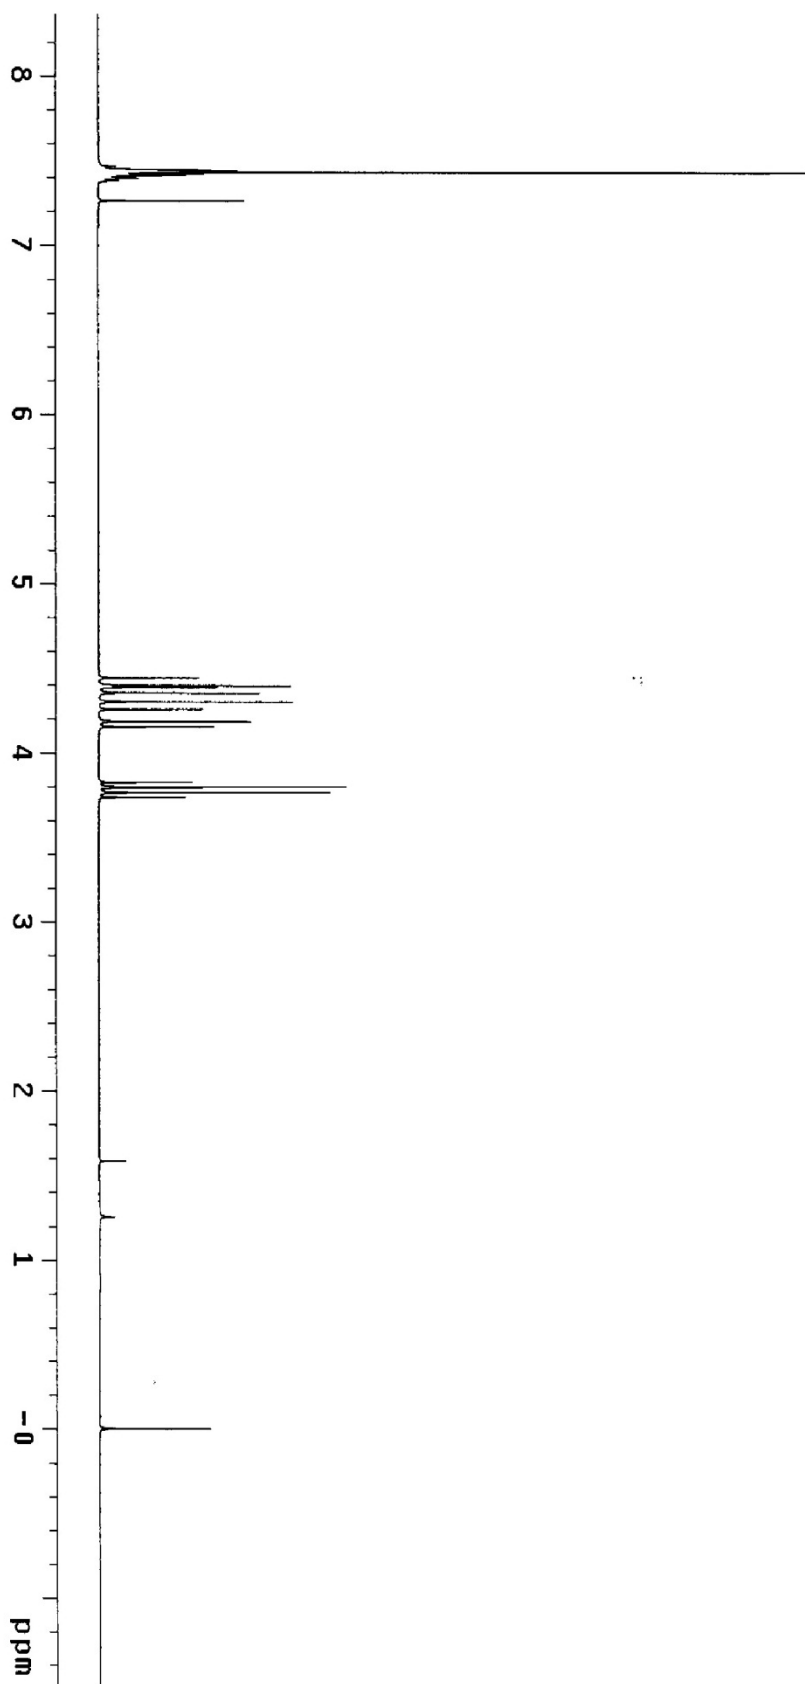

## STANDARD 1H OBSERVE

Pulse Sequence: s2pu1  
Solvent: CDCl3  
Ambient temperature  
UNIT/plus-300 "nmr2"  
Relax. delay 1.000 sec  
Pulse 15.0 degrees  
Acq. time 3.813 sec  
Width 4196.4 Hz  
16 repetitions  
OBSERVE H1 300.1390295 MHz  
DATA PROCESSING  
Line broadening 0.1 Hz  
FT size 32768  
Total time 1 min, 17 sec

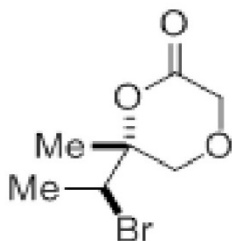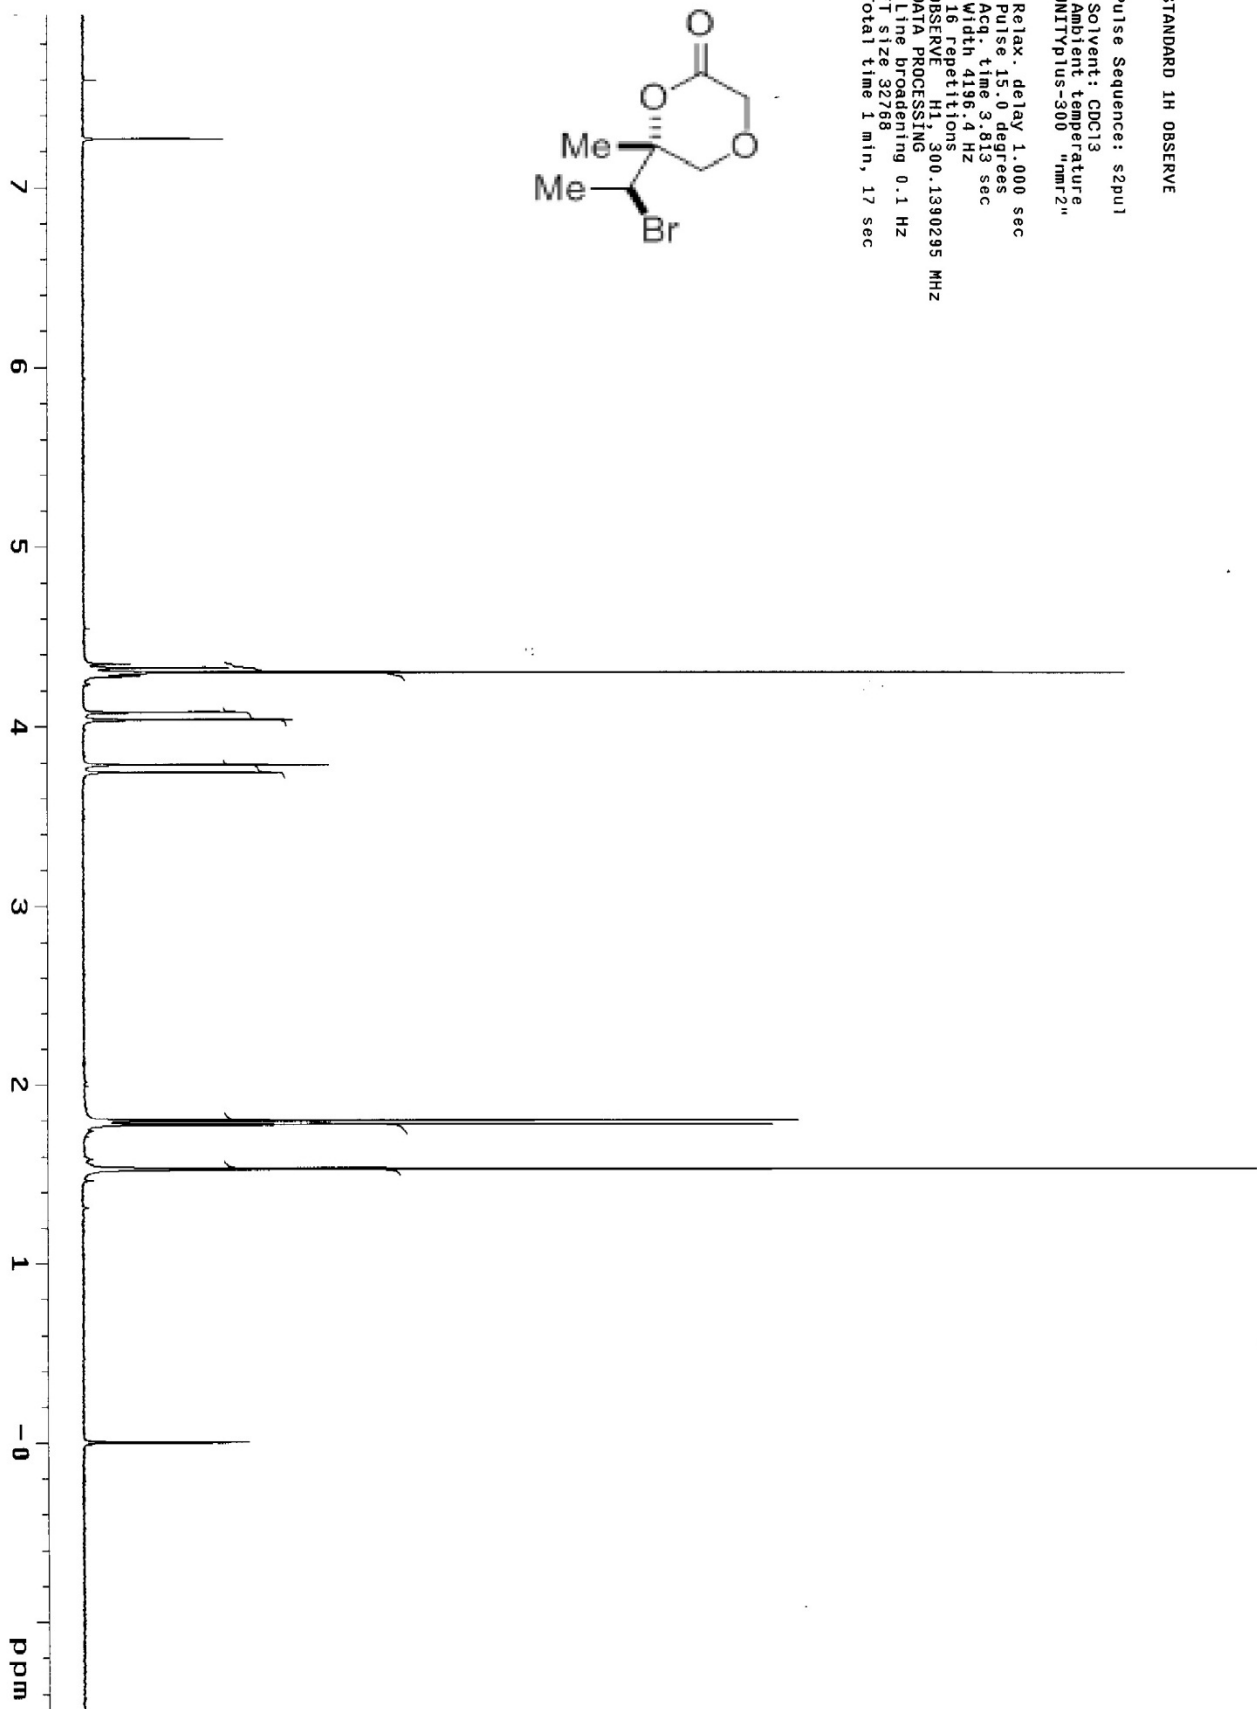

13C OBSERVE

Pulse Sequence: s2pu1  
Solvent: CDCl3  
Ambient temperature  
UNIT: plus-300 "nmr2"

Relax. delay 2.000 sec  
Pulse 36.0 degrees  
Acq. time 1.777 sec  
Width 18009.9 Hz  
620 Repetitions  
OBSERVE C13, 75.4700200 MHz  
DECOUPLE H1, 300.1409259 MHz  
Power 40 db  
continuously on  
WALTZ-16 modulated  
Single precision data  
DATA PROCESSING  
Line broadening 1.0 Hz  
FT size 65536  
Total time 1 hr, 4 min, 38 sec

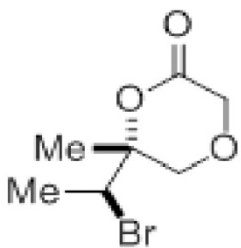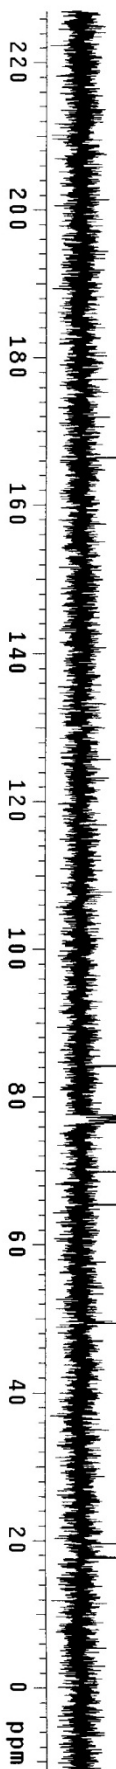

STANDARD 1H OBSERVE

Pulse Sequence: s2pu1  
Solvent: CDCl3  
Ambient temperature  
Mercury-400BB "nmr6"  
Relax. delay 2.000 sec  
Pulse 16.4 degrees  
Acq. time 2.856 sec  
Width 5602.2 Hz  
16 repetitions  
OBSERVE H1, 400.2669767 MHz  
DATA PROCESSING  
Line broadening 0.1 Hz  
FT size 32768  
Total time 0 min, 0 sec

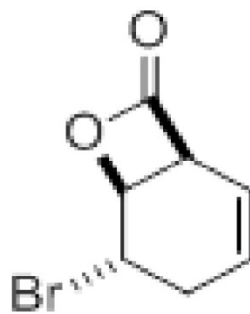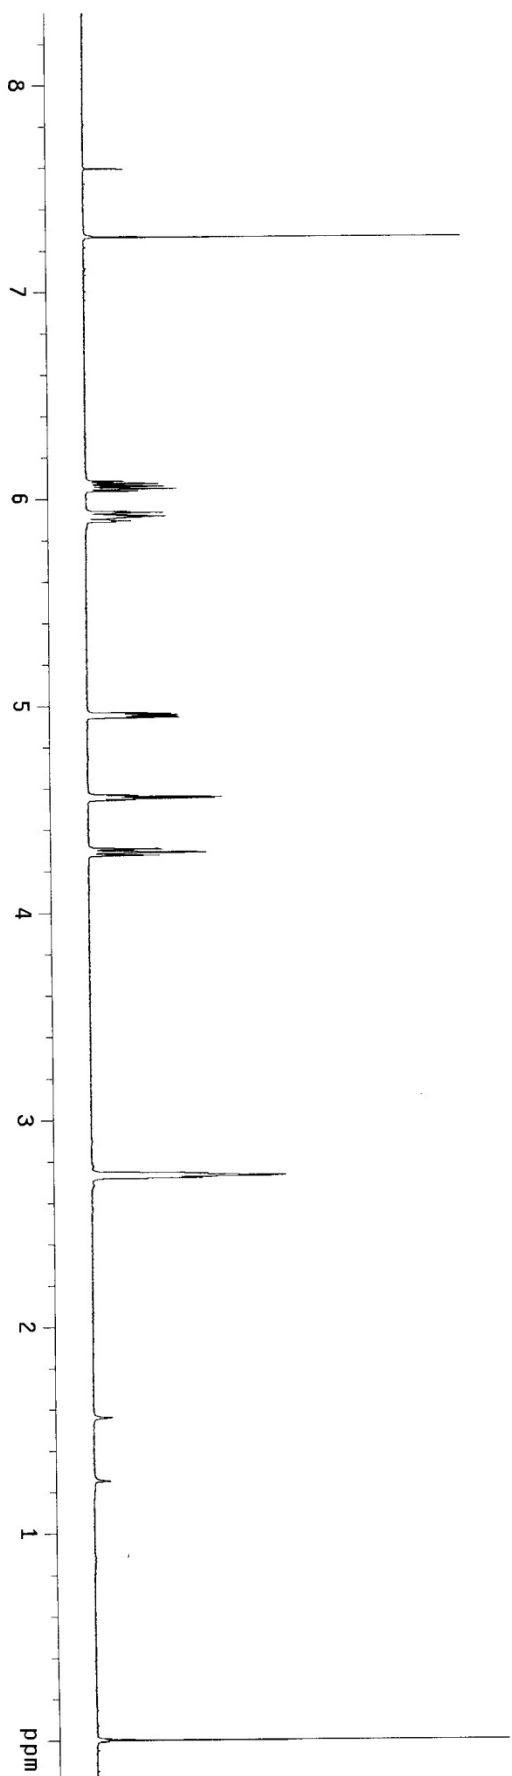

## *X-RAY Crystal Structures*

Compound **6-bromo-5**

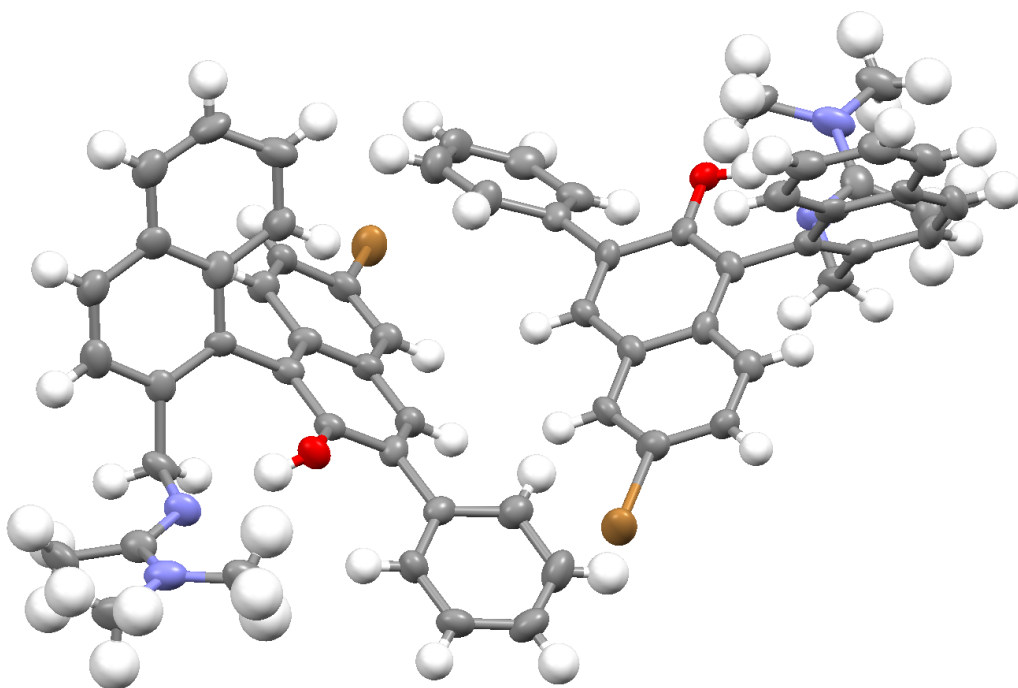

Compound **7e**

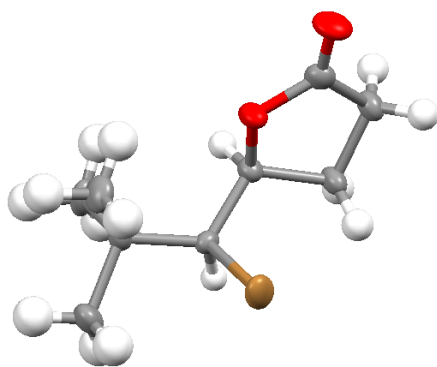

Compound **13**

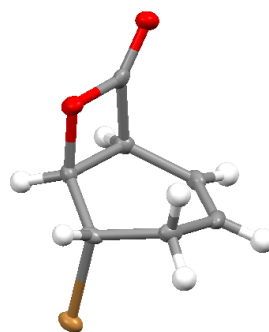

## References

- 
- 1 Pangborn, A. B.; Giardello, M. A.; Grubbs, R. H.; Rosen, R. K.; Timmers, F. J. *Organometallics* **1996**, *15*, 1518-1520.
- 2 Ooi, T.; Kameda, M.; Maruoka, K. *J. Am. Chem. Soc.* **2003**, *125*, 5139–5151.
- 3 Shi, M.; Chen, L.-H, Li, C.-Q. *J. Am. Chem. Soc.* **2005**, *127*, 3790–3800.
- 4 Uozumi, Y.; Suzuki, N.; Ogiwara, A.; Hayashi, T. *Tetrahedron* **1994**, *50*, 4293–4302.
- 5 Oszczapowicz, J.; Raczynska, E. *J. Chem. Soc. Perkin Trans. II* **1984**, 1643–1646.
- 6 Tan, C. K. T.; Zhou, L.; Yeung, Y.-Y. *Org. Lett.* **2011**, *13*, 2738–2741.
- 7 Kaga, H.; Coto, K.; Takahashi, T.; Hino, M.; Tokuashi, T.; Orito, K. *Tetrahedron* **1996**, *52*, 8451–8470.
- 8 Zhou, L.; Tan, C. K. T.; Jiang, X.; Chen, F.; Yeung, Y.-Y. *J. Am. Chem. Soc.* **2010**, *132*, 15474–15476.
- 9 (a) Back, T. G.; Nava-Salgado, V. O.; Payne, J. E. *J. Org. Chem.* **2001**, *66*, 4361–4368. (b) Helavi, V. B.; Solabannavar, S. B.; Desai, U. V.; Mane, R. B. *J. Chem. Res.* **2003**, 174–175.
- 10 Murai, K.; Matsushita, T.; Nakamura, A.; Fukushima, S.; Shimura, M.; Fujioka, H. *Angew. Chem. Int. Ed.* **2010**, *49*, 9174–9177.
- 11 Ohmura, T.; Masuda, K.; Takase, I.; Suginome, M. *J. Am. Chem. Soc.* **2009**, *131*, 16624-16625.
- 12 Hirai, S.; Nakada, M. *Tetrahedron* **2011**, *67*, 518-530.
- 13 Barnett, W. E.; Needham, L. L. *J. Org. Chem.* **1975**, *40*, 2843-2844.
